# Supplementary material for: Lewis acid catalysed asymmetric cascade reaction of cyclopropyl ketones: concise synthesis of pyrrolobenzothiazoles
Source: Royal Society of Chemistry journal article supplement (doi:10.1039/d0cc05667g), 2020-01-01

## Supporting Information

### **Lewis acid catalysed asymmetric cascade reaction of cyclopropyl ketones: concise synthesis of pyrrolobenzothiazoles**

Fenzhen Chang, Bin Shen, Sijing Wang, Lili Lin\* and Xiaoming Feng\*

Key Laboratory of Green Chemistry & Technology, Ministry of Education, College of Chemistry, Sichuan University, Chengdu 610064, China

## Table of Contents

|                                                                                                         |    |
|---------------------------------------------------------------------------------------------------------|----|
| (A) General Information .....                                                                           | 2  |
| (B) Typical Procedure for Preparation of the Racemic Products.....                                      | 2  |
| (C) Typical Procedure for Catalytic Asymmetric Reaction of D-A Cyclopropane with 2-Aminothiophenol..... | 2  |
| (D) Optimization of the Reaction Conditions .....                                                       | 3  |
| (E) Gram-Scale Synthesis of <b>3aa</b> .....                                                            | 6  |
| (F) Transformation of the Product <b>3ga</b> .....                                                      | 6  |
| (G) Control Experiments:.....                                                                           | 7  |
| (H) The Kinetic Resolution Experiments .....                                                            | 8  |
| (I) Crystal Data of Products .....                                                                      | 8  |
| (J) References.....                                                                                     | 12 |
| (K) Spectral Characterization Data for the Products .....                                               | 15 |
| (L) Copies of NMR Spectra.....                                                                          | 31 |
| (M) Copies of CD spectra for Recovered D-A Cyclopropanes .....                                          | 58 |

### (A) General Information

<sup>1</sup>H NMR spectra were recorded at 400 MHz. The chemical shifts were recorded in ppm relative to tetramethylsilane at 0.00 ppm ( $\delta$  ppm). Data were reported as follows: chemical shift, multiplicity (s = singlet, d = doublet, dd = doublet of doublets, t = triplet, m = multiplet), coupling constants (Hz), integration. <sup>13</sup>C{<sup>1</sup>H} NMR data were collected at 100 MHz with complete proton decoupling. Chemical shifts were reported in terms of chemical shift in reference to the CDCl<sub>3</sub> solvent signal (77.16 ppm). <sup>19</sup>F{<sup>1</sup>H} NMR spectra were collected at 376 MHz with complete proton decoupling. Optical rotations were reported as follows:  $[\alpha]_D^{25}$  = (c: g/100 mL, in solvent,  $\lambda$ : 589 nm). All *ee* values were determined by chiral HPLC analysis on Daicel chiralpak IA, ID, IE, IG, AD-H and UPC<sup>2</sup> analysis on chiral Daicel chiralcel OJ-3, in comparison with the authentic racemates. IR spectra were recorded on commercial instrument and the wave numbers of the absorption peaks are given in cm<sup>-1</sup>. HRMS were recorded on a commercial apparatus (ESI source) and methanol was used to dissolve the sample. Reactions were monitored by thin layer chromatography (TLC). All reactions were performed in sealed oven-dried glass tubes unless otherwise noted. 1,1,2,2-tetrachloroethane (TCE) was distilled over powered CaH<sub>2</sub>. The *N,N*-Dioxide were prepared according to the methods reported in the literature.<sup>1</sup> Donor-Acceptor cyclopropanes were prepared according to previous work.<sup>2</sup> Unless noted, other commercial reagents were used without further purification.

### (B) Typical Procedure for Preparation of the Racemic Products

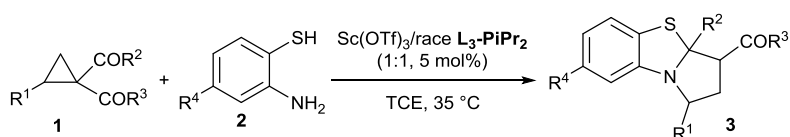

Racemic ligand ( $\pm$ )-L<sub>3</sub>-PiPr<sub>2</sub> (5 mol%), Sc(OTf)<sub>3</sub> (5 mol%), and D-A cyclopropane **1** (0.10 mmol) were stirred in 0.5 mL of 1,1,2,2-tetrachloroethane at 35 °C under nitrogen atmosphere for 0.5 h. Then, 2-aminothiophenol **2** (0.10 mmol) was added and the mixture was stirred at 35 °C for 48 h. Then, the reaction mixture was purified by column chromatography on silica gel (petroleum ether/dichloromethane = 2/1) to afford the desired racemic product.

### (C) Typical Procedure for Catalytic Asymmetric Reaction of D-A Cyclopropane with 2-Aminothiophenol

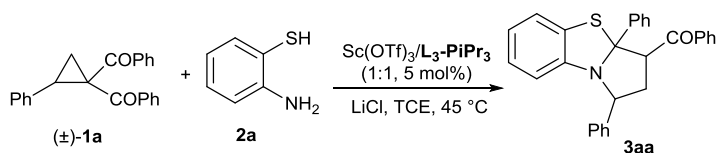

*N,N'*-Dioxide ligand **L<sub>3</sub>-PiPr<sub>3</sub>** (5 mol%), Sc(OTf)<sub>3</sub> (5 mol%), LiCl (30 mol%) and D-A cyclopropane **1a** (0.22 mmol) were stirred in 0.5 mL of 1,1,2,2-tetrachloroethane at 35 °C under nitrogen atmosphere for 0.5 h. Then, 2-aminothiophenol **2a** (0.10 mmol) was added and the mixture was stirred at 45 °C for 48 h. Then, the reaction mixture was purified by column chromatography on silica gel (petroleum ether/dichloromethane = 2/1) to afford the desired product as a yellow foam in 85% yield with 83:17 d.r. and 95% ee.

## (D) Optimization of the Reaction Conditions

**Table S1.** Screening of Metals.

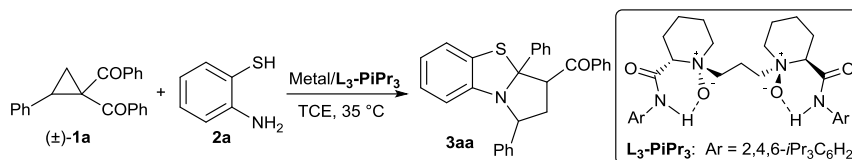

| Entry <sup>a</sup> | Metal                                | Yield (%) <sup>b</sup> | d.r. <sup>c</sup> | ee (%) <sup>c</sup> |
|--------------------|--------------------------------------|------------------------|-------------------|---------------------|
| 1                  | Y(OTf) <sub>3</sub>                  | 39                     | 76:24             | 58/60               |
| 2                  | Yb(OTf) <sub>3</sub>                 | 40                     | 70:30             | 46/56               |
| 3                  | Mg(OTf) <sub>2</sub>                 | n.r.                   | --                | --                  |
| 4                  | Zn(OTf) <sub>2</sub>                 | n.r.                   | --                | --                  |
| 5                  | Al(OTf) <sub>3</sub>                 | n.r.                   | --                | --                  |
| 6                  | Sc(OTf) <sub>3</sub>                 | 60                     | 65:35             | 93/93               |
| 7                  | ScCl <sub>3</sub> ·6H <sub>2</sub> O | 12                     | 60:40             | 96/96               |
| 8                  | Hf(OTf) <sub>4</sub>                 | 8                      | 59:41             | 2/0                 |
| 9                  | Tb(OTf) <sub>3</sub>                 | 18                     | 78:22             | 56/54               |
| 10                 | In(OTf) <sub>3</sub>                 | 9                      | 83:17             | 0/0                 |
| 11                 | Ga(OTf) <sub>3</sub>                 | 12                     | 80:20             | 4/4                 |
| 12                 | Sm(OTf) <sub>3</sub>                 | 16                     | 79:21             | 63/64               |

<sup>a</sup> All reaction were performed with metal/**L<sub>3</sub>-PiPr<sub>3</sub>** (10 mol%, 1:1), D-A cyclopropane **1a** (0.22 mmol), 2-aminothiophenol **2a** (0.1 mmol) in 1,1,2,2-tetrachloroethane (0.5 mL) at 35 °C for 26 h. <sup>b</sup> Isolated yield. <sup>c</sup> Determined by HPLC analysis on Daicel chiralpak ID.

**Table S2.** Screening of Ligands.

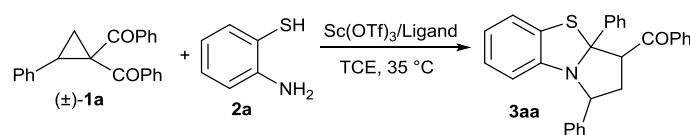

| Entry <sup>a</sup> | Ligand                                | Yield (%) <sup>b</sup> | d.r. <sup>c</sup> | ee (%) <sup>c</sup> |
|--------------------|---------------------------------------|------------------------|-------------------|---------------------|
| 1                  | <b>L<sub>3</sub>-RaPr<sub>2</sub></b> | 28                     | 53:47             | 90/89               |
| 2                  | <b>L<sub>3</sub>-PrPr<sub>2</sub></b> | 34                     | 64:36             | 80/80               |
| 3                  | <b>L<sub>3</sub>-PiPr<sub>2</sub></b> | 62                     | 73:27             | 91/92               |
| 4                  | <b>L<sub>3</sub>-TQtBu</b>            | 26                     | 69:31             | -16/-26             |
| 5                  | <b>L<sub>3</sub>-PePr<sub>2</sub></b> | 34                     | 75:25             | 88/87               |
| 6                  | <b>L<sub>3</sub>-PiPh</b>             | 18                     | 77:23             | 24/32               |
| 7                  | <b>L<sub>3</sub>-PiBn</b>             | 30                     | 82:18             | 5/5                 |
| 8                  | <b>L<sub>3</sub>-PiMe<sub>2</sub></b> | 34                     | 81:19             | 35/29               |
| 8                  | <b>L<sub>3</sub>-PiEt<sub>2</sub></b> | 44                     | 82:18             | 60/59               |
| 9                  | <b>L<sub>3</sub>-PiPr<sub>3</sub></b> | 60                     | 65:35             | 93/93               |

|    |                                       |    |       |         |
|----|---------------------------------------|----|-------|---------|
| 10 | <b>L<sub>2</sub>-PiPr<sub>3</sub></b> | 74 | 82:18 | 34/31   |
| 11 | <b>L<sub>4</sub>-PiPr<sub>3</sub></b> | 10 | 45:55 | 64/70   |
| 12 | <b>PyBox</b>                          | 42 | 78:22 | -15/-11 |
| 13 | <b>Box</b>                            | <5 | -     | -       |

<sup>a</sup> All reaction were performed with Sc(OTf)<sub>3</sub>/ligand (1:1, 10 mol%), D-A cyclopropane **1a** (0.22 mmol), 2-aminothiophenol **2a** (0.1 mmol) in 1,1,2,2-tetrachloroethane (0.5 mL) at 35 °C for 26 h. <sup>b</sup> Isolated yield. <sup>c</sup> Determined by HPLC analysis on Daicel chiralpak ID.

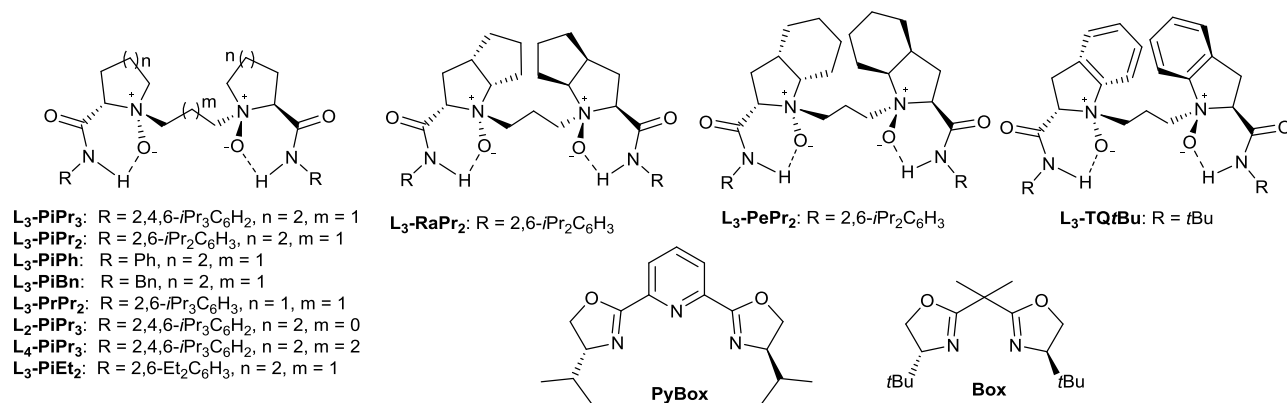

**Table S3.** Screening of Solvents.

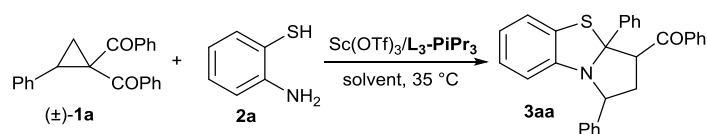

| Entry <sup>a</sup> | Solvent                   | Yield (%) <sup>b</sup> | d.r. <sup>c</sup> | ee (%) <sup>c</sup> |
|--------------------|---------------------------|------------------------|-------------------|---------------------|
| 1                  | Tetrahydrofuran           | <5                     | 66:34             | 73/84               |
| 2                  | Toluene                   | 12                     | 66:34             | 50/55               |
| 3                  | Dichloromethane           | 22                     | 54:46             | 92/93               |
| 4                  | Dichloroethane            | 35                     | 64:36             | 89/91               |
| 5                  | Trichloromethane          | 51                     | 67:33             | 93/94               |
| 6                  | 1,1,2,2-tetrachloroethane | 60                     | 65:35             | 93/93               |

<sup>a</sup> All reaction were performed with Sc(OTf)<sub>3</sub>/L<sub>3</sub>-PiPr<sub>3</sub> (10 mol%, 1:1), D-A cyclopropane **1a** (0.22 mmol), 2-aminothiophenol **2a** (0.1 mmol) in solvent (0.5 mL) at 35 °C for 26 h. <sup>b</sup> Isolated yield. <sup>c</sup> Determined by HPLC analysis on Daicel chiralpak ID.

**Table S4.** Screening of Additives.

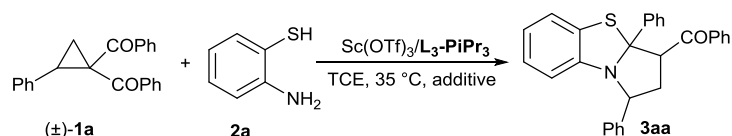

| Entry <sup>a</sup> | Additive | Yield (%) <sup>b</sup> | d.r. <sup>c</sup> | ee (%) <sup>c</sup> |
|--------------------|----------|------------------------|-------------------|---------------------|
| 1                  | 3 Å M.S. | 6                      | 80:20             | 55/60               |
| 2                  | 4 Å M.S. | 12                     | 79:21             | 53/55               |
| 3                  | 5 Å M.S. | 23                     | 77:23             | 53/56               |

|    |                    |    |       |       |
|----|--------------------|----|-------|-------|
| 4  | H <sub>2</sub> O   | 67 | 61:39 | 93/94 |
| 5  | LiCl               | 75 | 80:20 | 95/95 |
| 6  | LiBr               | 63 | 76:24 | 91/91 |
| 7  | LiNTf <sub>2</sub> | 42 | 56:44 | 64/64 |
| 8  | CaCl <sub>2</sub>  | 73 | 80:20 | 96/95 |
| 9  | NaCl               | 76 | 72:28 | 95/95 |
| 10 | MgBr <sub>2</sub>  | 52 | 66:34 | 96/96 |

<sup>a</sup> All reaction were performed with Sc(OTf)<sub>3</sub>/L<sub>3</sub>-PiPr<sub>3</sub> (10 mol%, 1:1), D-A cyclopropane **1a** (0.22 mmol), 2-aminothiophenol **2a** (0.1 mmol), additive (1 equiv) in 1,1,2,2-tetrachloroethane (0.5 mL) at 35 °C for 26 h. <sup>b</sup> Isolated yield. <sup>c</sup> Determined by HPLC analysis on Daicel chiralpak ID.

**Table S5.** Screening of Temperature.

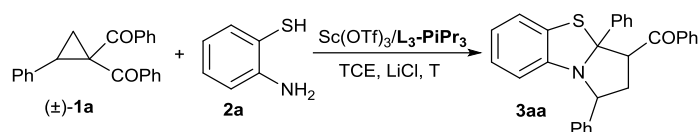

| Entry <sup>a</sup> | Temperature (°C) | Yield (%) <sup>b</sup> | d.r. <sup>c</sup> | ee (%) <sup>c</sup> |
|--------------------|------------------|------------------------|-------------------|---------------------|
| 1                  | 30               | 65                     | 76:24             | 96/96               |
| 2                  | 35               | 75                     | 81:19             | 96/96               |
| 3                  | 40               | 65                     | 84:16             | 96/96               |
| 4                  | 45               | 72                     | 83:17             | 96/96               |
| 5                  | 50               | 71                     | 85:15             | 96/96               |

<sup>a</sup> All reaction were performed with Sc(OTf)<sub>3</sub>/L<sub>3</sub>-PiPr<sub>3</sub> (10 mol%, 1:1), D-A cyclopropane **1a** (0.22 mmol), 2-aminothiophenol **2a** (0.1 mmol), LiCl (50 mol%) in 1,1,2,2-tetrachloroethane (0.5 mL) for 26 h. <sup>b</sup> Isolated yield. <sup>c</sup> Determined by HPLC analysis on Daicel chiralpak ID.

**Table S6.** Screening the Ratio of Substrates.

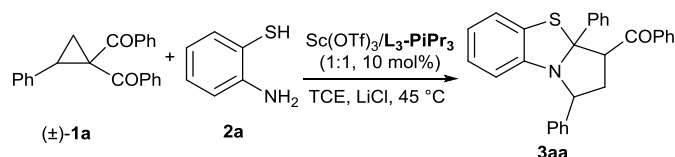

| Entry <sup>a</sup> | <b>1a:2a</b> | Yield (%) <sup>b</sup> | d.r. <sup>c</sup> | ee (%) <sup>c</sup> |
|--------------------|--------------|------------------------|-------------------|---------------------|
| 1                  | 2.1:1        | 62                     | 82:18             | 93/93               |
| 2                  | 2.2:1        | 72                     | 83:17             | 96/96               |
| 3                  | 2.5:1        | 62                     | 82:18             | 95/96               |
| 4                  | 2:1          | 65                     | 85:15             | 95/96               |
| 5                  | 1:1.2        | 58                     | 82:18             | 51/41               |
| 6 <sup>d</sup>     | 2.2:1        | 78                     | 83:17             | 95/95               |

<sup>a</sup> All reaction were performed with Sc(OTf)<sub>3</sub>/L<sub>3</sub>-PiPr<sub>3</sub> (10 mol%, 1:1), LiCl (1 equiv) in 1,1,2,2-tetrachloroethane (0.2 M) for 26 h. <sup>b</sup> Isolated yield. <sup>c</sup> Determined by HPLC analysis on Daicel chiralpak ID. <sup>d</sup> Sc(OTf)<sub>3</sub>/L<sub>3</sub>-PiPr<sub>3</sub> (5 mol%, 1:1), LiCl (50 mol%) in 1,1,2,2-tetrachloroethane (0.2 M) for 48 h.

**Table S7.** Screening the Amount of LiCl.

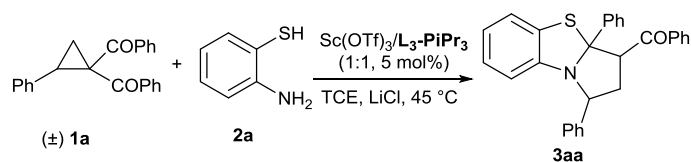

| Entry <sup>a</sup> | Amount of LiCl (mol%) | Yield (%) <sup>b</sup> | d.r. <sup>c</sup> | ee (%) <sup>c</sup> |
|--------------------|-----------------------|------------------------|-------------------|---------------------|
| 1                  | 50                    | 79                     | 82:18             | 95/95               |
| 2                  | 45                    | 68                     | 83:17             | 96/95               |
| 3                  | 40                    | 80                     | 83:17             | 96/95               |
| 4                  | 35                    | 72                     | 83:17             | 94/94               |
| 5                  | 30                    | 85                     | 83:17             | 95/96               |
| 6                  | 25                    | 84                     | 80:20             | 95/95               |
| 7                  | 10                    | 77                     | 85:15             | 95/95               |

<sup>a</sup> All reaction were performed with Sc(OTf)<sub>3</sub>/L<sub>3</sub>-PiPr<sub>3</sub> (5 mol%, 1:1) in 1,1,2,2-tetrachloroethane (0.2 M) at 45 °C for 48 h. <sup>b</sup> Isolated yield. <sup>c</sup> Determined by HPLC analysis on Daicel chiralpak ID.

### (E) Gram-Scale Synthesis of 3aa.

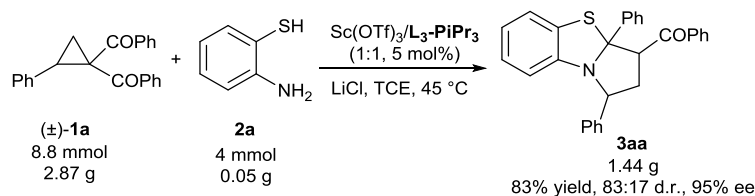

A 100 mL of dry round-bottom flask was charged with *N,N*-dioxide ligand L<sub>3</sub>-PiPr<sub>3</sub> (0.2 mmol), Sc(OTf)<sub>3</sub> (0.2 mmol), LiCl (1.0 mmol) and **1a** (8.8 mmol) under nitrogen atmosphere. The 1,1,2,2-tetrachloroethane (20 mL) was added and the mixture were stirred at 35 °C for 2 h. Then, **2a** (4.0 mmol) was added. The mixture was stirred at 45 °C for 2 days. The reaction mixture was purified by flash chromatography (petroleum ether/dichloromethane = 2/1) on silica gel to afford the desired product in 83% yield (1.44 g) with 83:17 d.r. and 95% ee as a yellow foam.

### (F) Transformation of the Product 3ga.

#### 1) Transformation of 3ga to 4

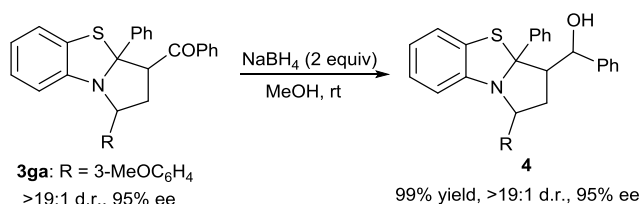

The **3ga** with high diastereoselectivity (>19:1 d.r.) was separated from the mixture of diastereoisomers by flash chromatography (petroleum ether/dichloromethane = 2/1).

A solution of product **3ga** (0.1 mmol), NaBH<sub>4</sub> (0.2 mmol) in MeOH (0.5 mL) was stirred at r.t. for 10 min. The reaction mixture was quenched at 0 °C with water and was then extracted with DCM (3 x 10 mL). The combined organic layers were dried over anhydrous sodium sulfate, filtered and concentrated under reduced pressure. The product was purified by flash column chromatography on silica gel to furnished alcohol **4** in 99% yield with >19:1 d.r. and 95% ee.

#### 2) Transformation of 3ga to 5

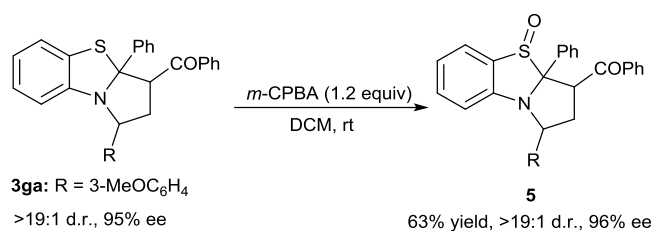

The **3ga** with high diastereoselectivity (>19:1 d.r.) was separated from the mixture of diastereoisomer by flash chromatography (petroleum ether/ dichloromethane = 2/1).

A solution of product **3ga** (0.1 mmol), *m*-CPBA (1.2 equiv) in DCM (2.0 mL) was stirred at r.t. and monitored by TLC. After the **3ga** was consumed, the reaction mixture was purified by flash column chromatography on silica gel to furnished sulfoxide **5** in 63% yield with >19:1 d.r. and 96% ee.

## (G) Control Experiments:

| <b>3aa</b> | <b>3aa'</b> | d.r.  |                   | d.r.  | <b>3aa</b> | <b>3aa'</b> |
|------------|-------------|-------|-------------------|-------|------------|-------------|
| (96% ee)   | (99% ee)    | 3/97  | $\xrightarrow{a}$ | 82/18 | (99% ee)   | (99% ee)    |
| (92% ee)   | (79% ee)    | 92/8  | $\xrightarrow{a}$ | 83/17 | (91% ee)   | (88% ee)    |
| (90% ee)   | (99% ee)    | 74/26 | $\xrightarrow{b}$ | 81/19 | (91% ee)   | (91% ee)    |
| (92% ee)   | (79% ee)    | 92/8  | $\xrightarrow{b}$ | 81/19 | (92% ee)   | (91% ee)    |

<sup>a</sup> standard contions; <sup>b</sup> at 70 °C without catalyst

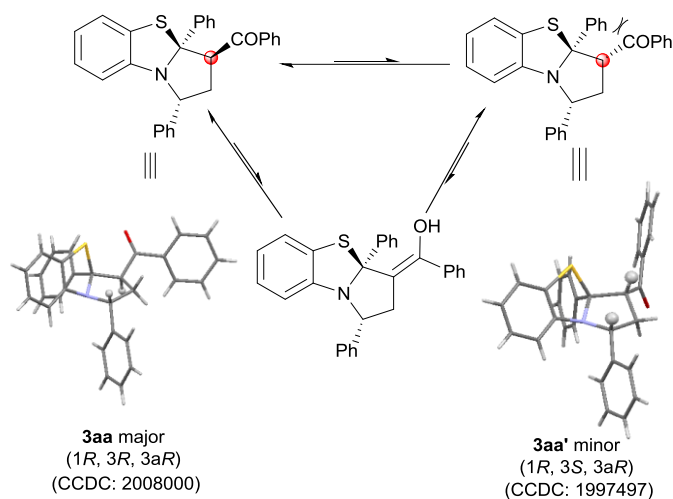

Condition a: *N,N*-Dioxide ligand **L<sub>3</sub>-PiPr<sub>3</sub>** (5 mol%), Sc(OTf)<sub>3</sub> (5 mol%), LiCl (30 mol%) and **3aa** (0.1 mmol) with different diastereoselectivity were stirred in 0.5 mL of 1,1,2,2-tetrachloroethane at 45 °C under nitrogen atmosphere for 24 h. Then, the reaction mixture was purified by column chromatography on silica gel (petroleum ether/dichloromethane = 2/1) to afford the product, which was further analyzed by HPLC.

Condition b: **3aa** (0.1 mmol) were stirred in 0.5 mL of 1,1,2,2-tetrachloroethane at 70 °C under nitrogen atmosphere for 24 h. Then, the reaction mixture was purified by column chromatography on silica gel (petroleum ether/dichloromethane = 2/1) to afford the product, which was further analyzed by HPLC.

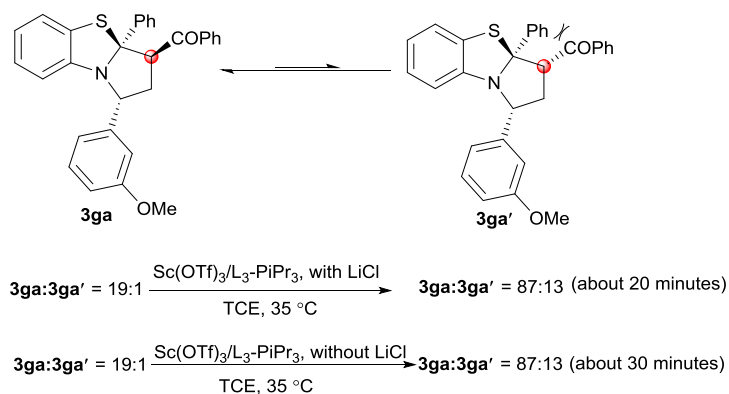

The d.r. values were determined by HPLC analysis on Daicel chiralpak IE.

## (H) The Kinetic Resolution Experiments.

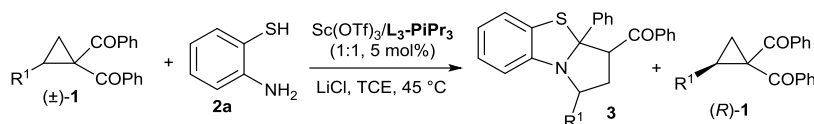

| Entry | R <sup>1</sup>                    | <b>3</b>               |       |                     | <b>1</b>               |                     |
|-------|-----------------------------------|------------------------|-------|---------------------|------------------------|---------------------|
|       |                                   | Yield (%) <sup>b</sup> | d.r.  | ee (%) <sup>c</sup> | Yield (%) <sup>b</sup> | ee (%) <sup>c</sup> |
| 1     | Ph                                | 37                     | 85:15 | 95                  | 54                     | 88                  |
| 2     | 1-naphthyl                        | 37                     | 91:9  | 94                  | 51                     | 90                  |
| 3     | 3-BrC <sub>6</sub> H <sub>4</sub> | 41                     | 77:23 | 70/85               | 52                     | 84                  |
| 4     | 4-BrC <sub>6</sub> H <sub>4</sub> | 41                     | 83:17 | 95                  | 49                     | 86                  |

<sup>a</sup> All reaction were performed with  $\text{Sc}(\text{OTf})_3/\text{L}_3\text{-PiPr}_3$  (5 mol%, 1:1), D-A cyclopropane **1** (0.2 mmol), 2-aminothiophenol **2a** (0.1 mmol), LiCl (30 mol%) in 1,1,2,2-tetrachloroethane (0.5 mL) for 48 h. <sup>b</sup> Isolated yield based on the amount of cyclopropanes. <sup>c</sup> Determined by HPLC on Daicel chiralpak ID, IE.

The kinetic resolution experiments were operated according to the typical procedure for catalytic asymmetric reaction of D-A cyclopropane with 2-aminothiophenol. When 0.2 mmol D-A cyclopropane reacted with 0.1 mmol 2-aminothiophenol, the products **3** were obtained in 37–41% yield with 77:23–91:9 d.r. and 70–95% ee. Meanwhile, the D-A cyclopropane **1** were recovered in 49–54% yield with 84–90% ee. The absolute configuration of the recovered D-A cyclopropane **1** was determined to be (*R*) by comparing their circular dichroism spectra with previous report.<sup>2a</sup>

## (I) Crystal Data of Products

(1) The following single crystal **3da** [C<sub>29</sub>H<sub>22</sub>BrNOS] was recrystallized from ethyl acetate/ethanol. The absolute configuration of **3da** was determined by X-ray diffraction. The data have been deposited at the Cambridge Crystallographic Data Center (CCDC1997496).

The colourless crystals in block-shape were selected and mounted for the single-crystal X-ray diffraction. The data set was collected at 300(2)K equipped with micro-focus Mo radiation source ( $K_{\alpha} = 0.71073\text{\AA}$ ). Applied with face-indexed numerical absorption correction, the structure solution was solved and refinement was processed by SHELXTL (version 6.14) program package.<sup>3</sup> The structure was analyzed by ADDSYM routine implemented in PLATON suite and no higher symmetry was suggested.<sup>4</sup>

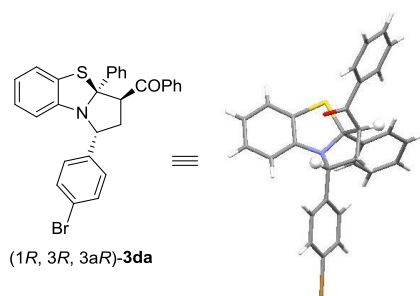



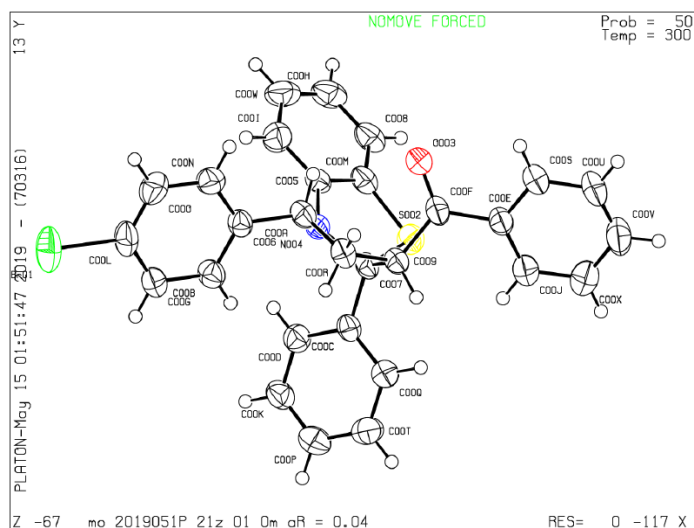

Figure S1. the thermal ellipsoid figure of **3da** with 50% probabilities

Table S9 Crystal data and structure refinement for (1*R*, 3*R*, 3*aR*)-**3da**.

|                                                              |                                                                              |
|--------------------------------------------------------------|------------------------------------------------------------------------------|
| Empirical formula                                            | C <sub>29</sub> H <sub>22</sub> BrNOS                                        |
| Formula weight                                               | 512.44                                                                       |
| Temperature/K                                                | 300(2)                                                                       |
| Crystal system                                               | monoclinic                                                                   |
| Space group                                                  | P2 <sub>1</sub>                                                              |
| <i>a</i> /Å                                                  | 10.6630(14)                                                                  |
| <i>b</i> /Å                                                  | 9.0225(9)                                                                    |
| <i>c</i> /Å                                                  | 12.3447(16)                                                                  |
| <i>α</i> /°                                                  | 90                                                                           |
| <i>β</i> /°                                                  | 90.216(5)                                                                    |
| <i>γ</i> /°                                                  | 90                                                                           |
| Volume/Å <sup>3</sup>                                        | 1187.6(2)                                                                    |
| <i>Z</i>                                                     | 2                                                                            |
| $\rho_{\text{calc}}/\text{cm}^3$                             | 1.433                                                                        |
| $\mu/\text{mm}^{-1}$                                         | 1.841                                                                        |
| <i>F</i> (000)                                               | 524.0                                                                        |
| Crystal size/mm <sup>3</sup>                                 |                                                                              |
| Radiation                                                    | MoK $\alpha$ ( $\lambda$ = 0.71073)                                          |
| 2 $\theta$ range for data collection/°                       | 5.592 to 52.796                                                              |
| Index ranges                                                 | -12 ≤ <i>h</i> ≤ 13, -10 ≤ <i>k</i> ≤ 11, -15 ≤ <i>l</i> ≤ 15                |
| Reflections collected                                        | 8989                                                                         |
| Independent reflections                                      | 4595 [ <i>R</i> <sub>int</sub> = 0.0228, <i>R</i> <sub>sigma</sub> = 0.0601] |
| Data/restraints/parameters                                   | 4595/1/298                                                                   |
| Goodness-of-fit on <i>F</i> <sup>2</sup>                     | 1.073                                                                        |
| Final <i>R</i> indexes [ <i>I</i> ≥ 2 $\sigma$ ( <i>I</i> )] | <i>R</i> <sub>1</sub> = 0.0373, <i>wR</i> <sub>2</sub> = 0.0864              |
| Final <i>R</i> indexes [all data]                            | <i>R</i> <sub>1</sub> = 0.0478, <i>wR</i> <sub>2</sub> = 0.0908              |

|                                             |            |
|---------------------------------------------|------------|
| Largest diff. peak/hole / e Å <sup>-3</sup> | 0.33/-0.44 |
| Flack parameter                             | 0.042(6)   |

2) The following single crystal of major diastereomer **3aa** [C<sub>29</sub>H<sub>23</sub>NOS] was recrystallized from ether/petroleum ether. The absolute configuration of **3aa** was determined by X-ray diffraction. The data have been deposited at the Cambridge Crystallographic Data Center (CCDC 2008000).

The colourless crystals in block-shape were selected and mounted for the single-crystal X-ray diffraction. The data set was collected at 170(2)K equipped with micro-focus Cu radiation source ( $K_{\alpha} = 1.54178\text{\AA}$ ). Applied with face-indexed numerical absorption correction, the structure solution was solved and refinement was processed by SHELXTL (version 6.14) program package.<sup>[3]</sup> The structure was analyzed by ADDSYM routine implemented in PLATON suite and no higher symmetry was suggested.<sup>[4]</sup>

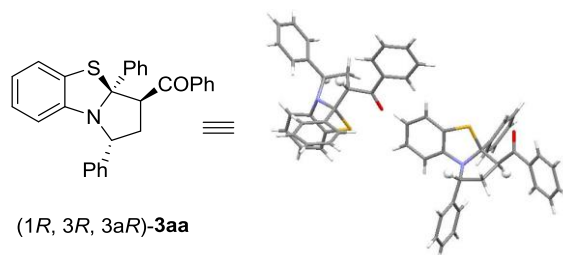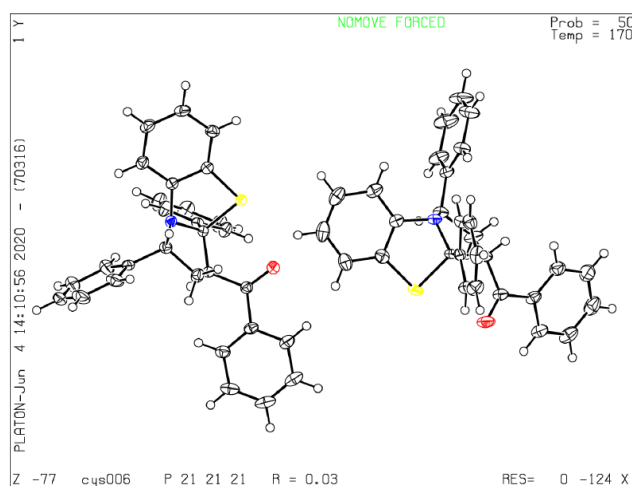

Figure S2. the thermal ellipsoid figure of **3aa** with 50% probabilities

Table S10 Crystal data and structure refinement for (1*R*, 3*R*, 3*aR*)-**3aa**.

|                       |                                                                              |
|-----------------------|------------------------------------------------------------------------------|
| Empirical formula     | C <sub>58</sub> H <sub>46</sub> N <sub>2</sub> O <sub>2</sub> S <sub>2</sub> |
| Formula weight        | 867.09                                                                       |
| Temperature/K         | 170(2)                                                                       |
| Crystal system        | orthorhombic                                                                 |
| Space group           | P2 <sub>1</sub> 2 <sub>1</sub> 2 <sub>1</sub>                                |
| <i>a</i> /Å           | 10.0966(5)                                                                   |
| <i>b</i> /Å           | 16.0127(8)                                                                   |
| <i>c</i> /Å           | 27.6462(14)                                                                  |
| $\alpha$ /°           | 90                                                                           |
| $\beta$ /°            | 90                                                                           |
| $\gamma$ /°           | 90                                                                           |
| Volume/Å <sup>3</sup> | 4469.7(4)                                                                    |

|                                                |                                                               |
|------------------------------------------------|---------------------------------------------------------------|
| Z                                              | 4                                                             |
| $\rho_{\text{calc}}/\text{g}/\text{cm}^3$      | 1.289                                                         |
| $\mu/\text{mm}^{-1}$                           | 1.444                                                         |
| F(000)                                         | 1824.0                                                        |
| Crystal size/ $\text{mm}^3$                    | 0.318 × 0.212 × 0.125                                         |
| Radiation                                      | CuK $\alpha$ ( $\lambda = 1.54178$ )                          |
| 2 $\theta$ range for data collection/ $^\circ$ | 6.378 to 161.376                                              |
| Index ranges                                   | $-11 \leq h \leq 12, -20 \leq k \leq 20, -35 \leq l \leq 35$  |
| Reflections collected                          | 81260                                                         |
| Independent reflections                        | 9717 [ $R_{\text{int}} = 0.0625, R_{\text{sigma}} = 0.0451$ ] |
| Data/restraints/parameters                     | 9717/0/578                                                    |
| Goodness-of-fit on $F^2$                       | 1.055                                                         |
| Final R indexes [ $ I  > 2\sigma(I)$ ]         | $R_1 = 0.0305, wR_2 = 0.0672$                                 |
| Final R indexes [all data]                     | $R_1 = 0.0336, wR_2 = 0.0691$                                 |
| Largest diff. peak/hole / $e \text{ \AA}^{-3}$ | 0.23/-0.21                                                    |
| Flack parameter                                | 0.010(3)                                                      |

3) The following single crystal of minor diastereomer **3aa'** [ $\text{C}_{29}\text{H}_{23}\text{NOS}$ ] was recrystallized from ethyl acetate/ethanol. The absolute configuration of **3aa'** was determined by X-ray diffraction. The data have been deposited at the Cambridge Crystallographic Data Center (CCDC1997497).

The colourless crystals in block-shape were selected and mounted for the single-crystal X-ray diffraction. The data set was collected at 303(2)K equipped with micro-focus Mo radiation source ( $K_{\alpha} = 0.71073\text{\AA}$ ). Applied with face-indexed numerical absorption correction, the structure solution was solved and refinement was processed by SHELXTL (version 6.14) program package.<sup>3</sup> The structure was analyzed by ADDSYM routine implemented in PLATON suite and no higher symmetry was suggested.<sup>4</sup>

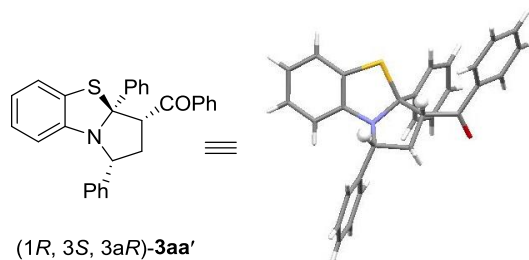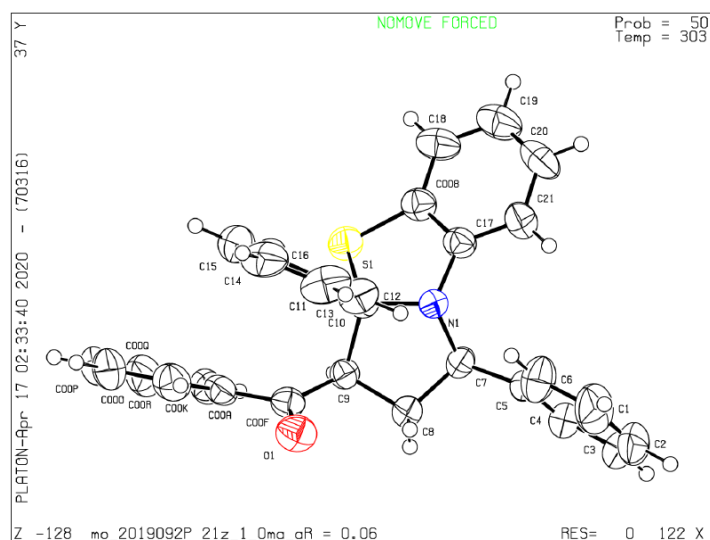

Figure S3. the thermal ellipsoid figure of **3aa'** with 50% probabilitiesTable S11 Crystal data and structure refinement for (1*R*, 3*S*, 3*aR*)-**3aa'**.

|                                             |                                                               |
|---------------------------------------------|---------------------------------------------------------------|
| Empirical formula                           | C <sub>29</sub> H <sub>23</sub> NOS                           |
| Formula weight                              | 433.54                                                        |
| Temperature/K                               | 303(2)                                                        |
| Crystal system                              | monoclinic                                                    |
| Space group                                 | P2 <sub>1</sub>                                               |
| a/Å                                         | 9.7976(15)                                                    |
| b/Å                                         | 8.7230(9)                                                     |
| c/Å                                         | 14.089(2)                                                     |
| α/°                                         | 90                                                            |
| β/°                                         | 110.142(5)                                                    |
| γ/°                                         | 90                                                            |
| Volume/Å <sup>3</sup>                       | 1130.5(3)                                                     |
| Z                                           | 2                                                             |
| ρ <sub>calc</sub> /g/cm <sup>3</sup>        | 1.274                                                         |
| μ/mm <sup>-1</sup>                          | 0.165                                                         |
| F(000)                                      | 456.0                                                         |
| Crystal size/mm <sup>3</sup>                |                                                               |
| Radiation                                   | MoKα (λ = 0.71073)                                            |
| 2θ range for data collection/°              | 5.594 to 56.532                                               |
| Index ranges                                | -13 ≤ h ≤ 11, -11 ≤ k ≤ 10, -18 ≤ l ≤ 18                      |
| Reflections collected                       | 10157                                                         |
| Independent reflections                     | 5121 [R <sub>int</sub> = 0.0632, R <sub>sigma</sub> = 0.1074] |
| Data/restraints/parameters                  | 5121/1/289                                                    |
| Goodness-of-fit on F <sup>2</sup>           | 0.975                                                         |
| Final R indexes [I ≥ 2σ (I)]                | R <sub>1</sub> = 0.0593, wR <sub>2</sub> = 0.1226             |
| Final R indexes [all data]                  | R <sub>1</sub> = 0.1420, wR <sub>2</sub> = 0.1772             |
| Largest diff. peak/hole / e Å <sup>-3</sup> | 0.19/-0.23                                                    |
| Flack parameter                             | 0.11(8)                                                       |

4) The following single crystal of **3ad** [C<sub>29</sub>H<sub>23</sub>NO<sub>2</sub>] was recrystallized from DMSO. The absolute configuration of **3ad** was determined by X-ray diffraction. The data have been deposited at the Cambridge Crystallographic Data Center (CCDC 2032629).

The colourless crystal in flake-shape, with approximate dimensions of 0.076 × 0.11 × 0.366 mm<sup>3</sup>, was selected and mounted for the single-crystal X-ray diffraction. The data set was collected by Bruker D8 Venture Photon II diffractometer at 143(2)K equipped with micro-focus Cu radiation source (K<sub>α</sub> = 1.54178Å). Applied with face-indexed numerical absorption correction, the structure solution was solved and refinement was processed by SHELXTL (version 6.14) program package.<sup>3</sup> The structure was analyzed by ADDSYM routine implemented in PLATON suite and no higher symmetry was suggested.<sup>4</sup>

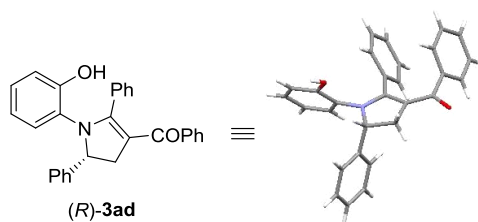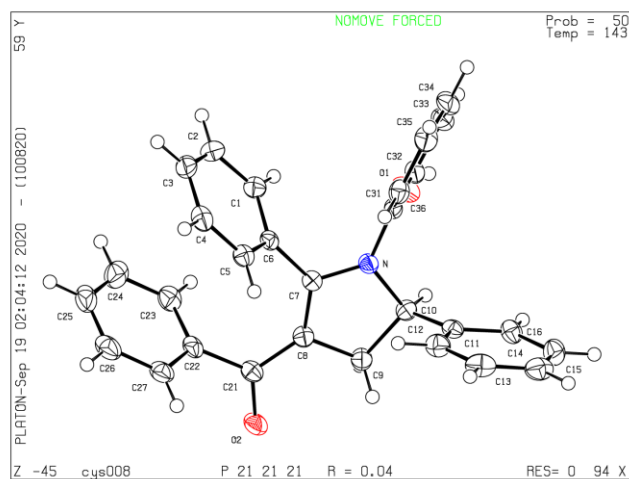

Figure S4. the thermal ellipsoid figure of **3ad** with 50% probabilities

Table S12 Crystal data and structure refinement for (*R*)-**3ad**.

|                                    |                                                 |
|------------------------------------|-------------------------------------------------|
| Empirical formula                  | C <sub>29</sub> H <sub>23</sub> NO <sub>2</sub> |
| Formula weight                     | 417.48                                          |
| Temperature/K                      | 143(2)                                          |
| Crystal system                     | orthorhombic                                    |
| Space group                        | P2 <sub>1</sub> 2 <sub>1</sub> 2 <sub>1</sub>   |
| a/Å                                | 7.1433(2)                                       |
| b/Å                                | 16.4271(5)                                      |
| c/Å                                | 18.9190(6)                                      |
| α/°                                | 90                                              |
| β/°                                | 90                                              |
| γ/°                                | 90                                              |
| Volume/Å <sup>3</sup>              | 2220.03(12)                                     |
| Z                                  | 2                                               |
| ρ <sub>calc</sub> /cm <sup>3</sup> | 1.249                                           |
| μ/mm <sup>-1</sup>                 | 0.613                                           |
| F(000)                             | 880.0                                           |
| Crystal size/mm <sup>3</sup>       | 0.076 × 0.11 × 0.366                            |
| Radiation                          | CuKα (λ = 1.54178)                              |
| 2θ range for data collection/°     | 7.126 to 144.762                                |
| Index ranges                       | -8 ≤ h ≤ 7, -20 ≤ k ≤ 20, -23 ≤ l ≤ 23          |

|                                                |                                                                  |
|------------------------------------------------|------------------------------------------------------------------|
| Reflections collected                          | 19698                                                            |
| Independent reflections                        | 4355 [ $R_{\text{int}} = 0.0662$ , $R_{\text{sigma}} = 0.0594$ ] |
| Data/restraints/parameters                     | 4355/1/293                                                       |
| Goodness-of-fit on $F^2$                       | 1.079                                                            |
| Final R indexes [ $ I  \geq 2\sigma(I)$ ]      | $R_1 = 0.0419$ , $wR_2 = 0.0994$                                 |
| Final R indexes [all data]                     | $R_1 = 0.0455$ , $wR_2 = 0.1013$                                 |
| Largest diff. peak/hole / $e \text{ \AA}^{-3}$ | 0.33/-0.30                                                       |
| Flack parameter                                | 0.02(9)                                                          |

---

## (J) References

- 1 (a) Y. H. Wen, X. Huang, J. L. Huang, Y. Xiong, B. Qin, and X. M. Feng, *Synlett*. 2005, **16**, 2445; (b) X. H. Liu, L. L. Lin, and X. M. Feng, *Acc. Chem. Res.* 2011, **44**, 574; (c) X. H. Liu, L. L. Lin, and X. M. Feng, *Org. Chem. Front.* 2014, **1**, 298–302.
- 2 (a) Y. Xia, X. H. Liu, H. F. Zheng, L. L. Lin, and X. M. Feng, *Angew. Chem. Int. Ed.* 2015, **54**, 227. (b) Y. Xia, L. L. Lin, F. Z. Chang, Y. T. Liao, X. H. Liu, and X. M. Feng, *Angew. Chem. Int. Ed.* 2016, **55**, 12228. (c) F. Z. Chang, L. L. Lin, Y. Xia, H. Zhang, S. X. Dong, X. H. Liu, and X. M. Feng, *Adv. Synth. Catal.* 2018, **360**, 2608. (d) Y. Xia, X. H. Liu, H. Z. Zheng, L. L. Lin, and X. M. Feng, *Angew. Chem. Int. Ed.* 2015, **54**, 227.
- 3 (a) Sheldrick, G. M. *Acta Cryst.* 2008, **A64**, 112; (b) Sheldrick, G. M. *Acta Cryst.* 2015, **A71**, 3; (c) Sheldrick, G. M. *Acta Cryst.* 2015, **C71**, 3.
- 4 Spek, A. L. *J. Appl. Cryst.* 2003, **36**, 7.

## (K) Spectral Characterization Data for the Products

### (1,3a-Diphenyl-1,2,3,3a-tetrahydrobenzo[d]pyrrolo[2,1-b]thiazol-3-yl)(phenyl)methanone (3aa).

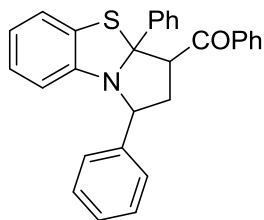

(**C<sub>29</sub>H<sub>23</sub>NOS**) Prepared according to the general procedure for 48 h. 36.7 mg, 85% yield; yellow foam. Melting point: 60 – 64 °C.  $[\alpha]_D^{20} = +506.5$  (c 0.69, CH<sub>2</sub>Cl<sub>2</sub>). 83:17 d.r. (determined by <sup>1</sup>H NMR), 95% ee for the major isomer and 95% ee for the minor isomer. **HPLC** (Chiral ID column), *n*PrOH/*n*Hexane = 20/80, Flow rate: 1.0 mL/min, 227 nm,  $t_{\text{major isomer}} = 8.05$  min (major), 6.85 min (minor);  $t_{\text{minor isomer}} = 7.45$  min (major), 6.27 min (minor). Major isomer: **<sup>1</sup>H NMR** (400 MHz, CDCl<sub>3</sub>)  $\delta$  7.88 – 7.80 (m, 4H), 7.63 – 7.58 (m, 2H), 7.57 – 7.42 (m, 1H), 7.47 – 7.41 (m, 4H), 7.38 – 7.34 (m, 1H), 7.34 – 7.27 (m, 2H), 7.25 – 7.19 (m, 1H), 7.09 – 7.03 (m, 1H), 6.87 – 6.79 (m, 2H), 6.68 – 6.62 (m, 1H), 4.78 (dd,  $J = 6.0, 8.0$  Hz, 1H), 4.67 (t,  $J = 7.2$  Hz, 1H), 3.01 – 2.90 (m, 1H), 2.42 – 2.31 (m, 1H). **<sup>13</sup>C{<sup>1</sup>H} NMR** (100 MHz, CDCl<sub>3</sub>)  $\delta$  198.3, 148.6, 147.4, 144.3, 137.1, 133.6, 133.2, 128.9, 128.9, 128.8, 128.4, 127.7, 127.6, 127.2, 125.9, 124.9, 124.4, 121.7, 116.2, 91.1, 70.8, 56.0, 40.3. **HRMS (FTMS+c ESI)** calcd for C<sub>30</sub>H<sub>26</sub>NO<sub>2</sub>S<sup>+</sup> ([M]<sup>+</sup>+H<sup>+</sup>) = 434.1573, Found 434.1576; **IR (neat)**: 3059, 1681, 1579, 1491, 1451, 1262, 1220, 1024, 736, 699 cm<sup>-1</sup>

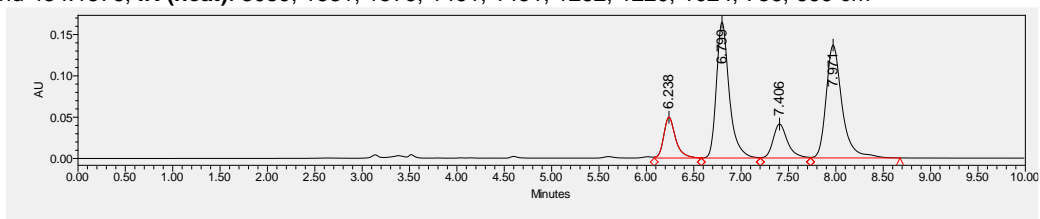

|   | Retention Time | Area    | % Area |
|---|----------------|---------|--------|
| 1 | 6.238          | 430218  | 10.74  |
| 2 | 6.799          | 1545187 | 38.56  |
| 3 | 7.406          | 433557  | 10.82  |
| 4 | 7.971          | 1597767 | 39.88  |

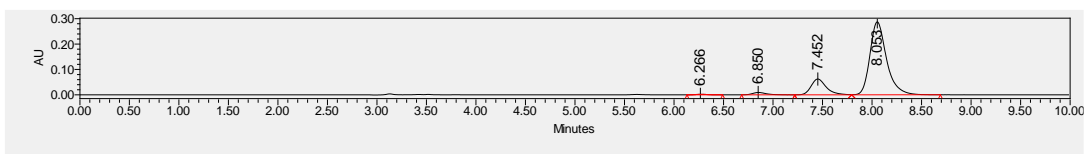

|   | Retention Time | Area    | % Area |
|---|----------------|---------|--------|
| 1 | 6.266          | 16398   | 0.40   |
| 2 | 6.850          | 88036   | 2.14   |
| 3 | 7.452          | 660590  | 16.06  |
| 4 | 8.053          | 3348253 | 81.40  |

### Phenyl{3a-phenyl-1-(*p*-tolyl)-1,2,3,3a-tetrahydrobenzo[d]pyrrolo[2,1-b]thiazol-3-yl}methanone (3ba)

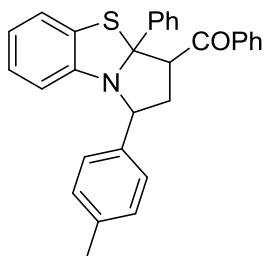

(**C<sub>30</sub>H<sub>25</sub>NOS**) Prepared according to the general procedure for 48 h. 31.9 mg, 71% yield; yellow foam. Melting point: 78 – 82 °C.  $[\alpha]_D^{20} = +472.0$  (c 0.60, CH<sub>2</sub>Cl<sub>2</sub>). 83:17 d.r. (determined by <sup>1</sup>H NMR), 95% ee for the major isomer and 95% ee for the minor isomer. **HPLC** (Chiral ID column), *n*PrOH/*n*Hexane = 20/80, Flow rate: 1.0 mL/min, 227 nm,  $t_{\text{major isomer}} = 8.20$  min (major), 6.73 min (minor);  $t_{\text{minor isomer}} = 7.48$  min (major), 5.75 min (minor). Major isomer: **<sup>1</sup>H NMR** (400 MHz, CDCl<sub>3</sub>)  $\delta$  7.88 – 7.80 (m, 4H), 7.52 – 7.39 (m, 5H), 7.32 – 7.23 (m, 5H), 7.08 – 7.03 (m, 1H), 6.86 – 6.81 (m, 2H), 6.69 – 6.63 (m, 1H), 4.75 (dd,  $J = 4.0, 8.0$  Hz, 1H), 4.66 (t,  $J = 7.2$  Hz, 1H), 2.98 – 2.89 (m, 1H), 2.41 (s, 3H), 2.39 – 2.32 (m, 1H). **<sup>13</sup>C{<sup>1</sup>H} NMR** (100 MHz, CDCl<sub>3</sub>)  $\delta$  198.4, 148.6, 147.5, 141.3, 137.2, 137.1, 133.6, 133.2, 129.6, 128.9, 128.8, 128.4, 127.7, 127.1, 125.9, 124.9, 124.3, 121.7, 116.2, 91.1, 70.6, 56.1, 40.3, 21.3. **HRMS (FTMS+c ESI)** calcd for C<sub>30</sub>H<sub>26</sub>NO<sub>2</sub>S<sup>+</sup> ([M]<sup>+</sup>+H<sup>+</sup>) = 448.1730, Found 448.1736; **IR (neat)**: 3056, 1681, 1596, 1579, 1446, 1260, 1219, 749, 697 cm<sup>-1</sup>

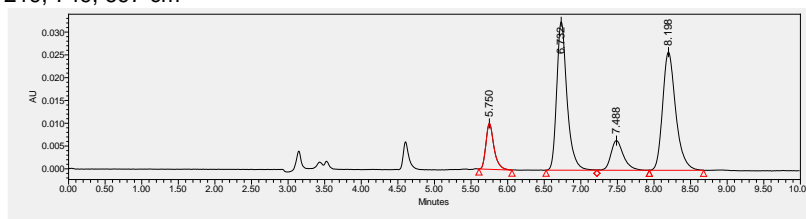

|   | Retention Time | Area   | % Area |
|---|----------------|--------|--------|
| 1 | 5.750          | 77331  | 9.70   |
| 2 | 6.732          | 318438 | 39.96  |

|   |       |        |       |
|---|-------|--------|-------|
| 3 | 7.488 | 77953  | 9.78  |
| 4 | 8.198 | 323099 | 40.55 |

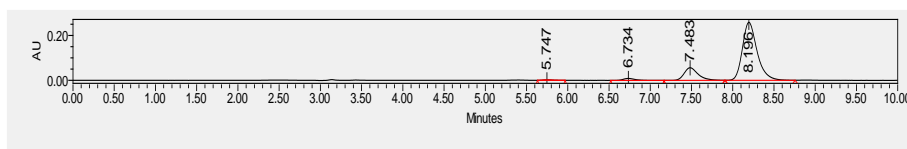

|   | Retention Time | Area    | % Area |
|---|----------------|---------|--------|
| 1 | 5.747          | 16695   | 0.42   |
| 2 | 6.734          | 84691   | 2.13   |
| 3 | 7.483          | 664753  | 16.72  |
| 4 | 8.196          | 3209735 | 80.73  |

### {1-(4-Chlorophenyl)-3a-phenyl-1,2,3,3a-tetrahydrobenzo[d]pyrrolo[2,1-b]thiazol-3-yl}(phenyl)methanone (3ca)

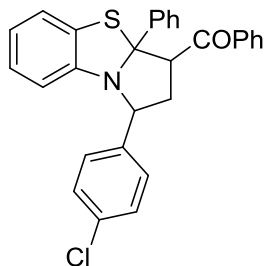

( $C_{29}H_{22}ClNOS$ ) Prepared according to the general procedure for 48 h. 36.8 mg, 79% yield; yellow foam. Melting point: 70 – 74 °C.  $[\alpha]_D^{20} = +445.9$  (c 0.73,  $CH_2Cl_2$ ). 83:17 d.r. (determined by  $^1H$  NMR), 96% ee for the major isomer and 92% ee for the minor isomer. HPLC (Chiral ID column), *i*PrOH/*n*Hexane = 10/90, Flow rate: 1.0 mL/min, 227 nm,  $t_{major\ isomer} = 9.87$  min (major), 8.52 min (minor);  $t_{minor\ isomer} = 10.72$  min (major), 7.41 min (minor). Major isomer:  $^1H$  NMR (400 MHz,  $CDCl_3$ )  $\delta$  7.88 – 7.83 (m, 2H), 7.81 – 7.74 (m, 2H), 7.58 – 7.51 (m, 3H), 7.47 – 7.39 (m, 4H), 7.34 – 7.28 (m, 2H), 7.25 – 7.22 (m, 1H), 7.08 – 7.02 (m, 1H), 6.90 – 6.80 (m, 2H), 6.64 – 6.59 (m, 1H), 4.76 (t,  $J = 6.8$  Hz, 1H), 4.65 (t,  $J = 7.2$  Hz, 1H), 3.00 – 2.90 (m, 1H), 2.37 – 2.21 (m, 1H).  $^{13}C\{^1H\}$  NMR (100 MHz,  $CDCl_3$ )  $\delta$  198.2, 148.3, 147.2, 142.8, 137.0, 133.7, 133.3, 133.1, 129.1, 128.9, 128.8, 128.5, 128.5, 127.8, 125.8, 125.0, 124.5, 121.8, 116.1, 91.0, 70.2, 55.8, 40.1. HRMS (FTMS+c ESI) calcd for  $C_{29}H_{23}^{35}ClNOS^+$  ( $[M]+H^+$ ) =

468.1183, Found 468.1184; calcd for  $C_{29}H_{23}^{37}ClNOS^+$  ( $[M]+H^+$ ) = 470.1154, Found 470.1161; IR (neat): 3056, 1681, 1596, 1579, 1461, 1264, 1219, 735, 697  $cm^{-1}$

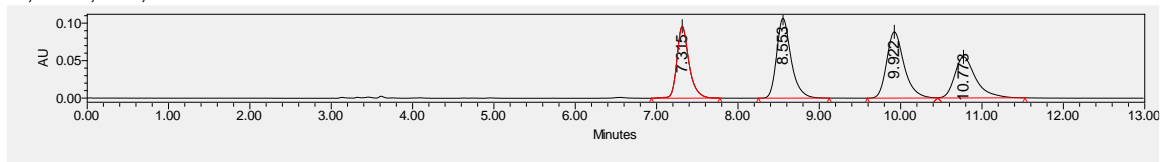

|   | Retention Time | Area    | % Area |
|---|----------------|---------|--------|
| 1 | 7.315          | 991102  | 21.51  |
| 2 | 8.553          | 1310884 | 28.45  |
| 3 | 9.922          | 1316686 | 28.58  |
| 4 | 10.773         | 988624  | 21.46  |

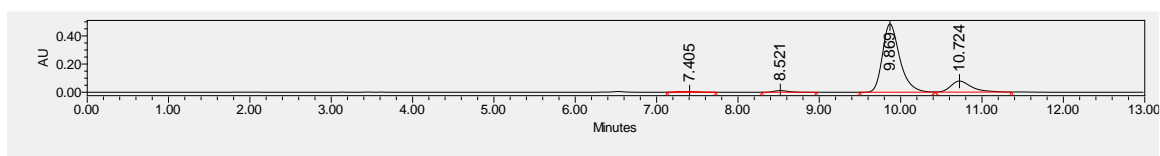

|   | Retention Time | Area    | % Area |
|---|----------------|---------|--------|
| 1 | 7.405          | 58871   | 0.67   |
| 2 | 8.521          | 145510  | 1.66   |
| 3 | 9.869          | 7154047 | 81.77  |
| 4 | 10.724         | 1390897 | 15.90  |

### {1-(4-Bromophenyl)-3a-phenyl-1,2,3,3a-tetrahydrobenzo[d]pyrrolo[2,1-b]thiazol-3-yl}(phenyl)methanone (3da)

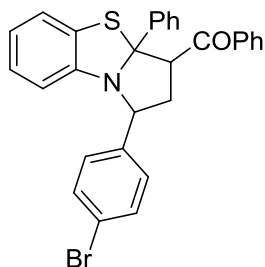

( $C_{29}H_{22}BrNOS$ ) Prepared according to the general procedure for 72 h. 43.0 mg, 84% yield; yellow foam. Melting point: 64 – 68 °C.  $[\alpha]_D^{20} = +394.8$  (c 0.74,  $CH_2Cl_2$ ). 82:18 d.r. (determined by  $^1H$  NMR), 96% ee for the major isomer and 96% ee for the minor isomer. HPLC (Chiral ID column), *i*PrOH/*n*Hexane = 20/80, Flow rate: 1.0 mL/min, 227 nm,  $t_{major\ isomer} = 8.26$  min (major), 7.25 min (minor);  $t_{minor\ isomer} = 8.86$  min (major), 6.40 min (minor). Major isomer:  $^1H$  NMR (400 MHz,  $CDCl_3$ )  $\delta$  7.87 – 7.83 (m, 2H), 7.80 – 7.75 (m, 2H), 7.58 – 7.54 (m, 3H), 7.50 – 7.42 (m, 4H), 7.34 – 7.27 (m, 2H), 7.25 – 7.19 (m, 1H), 7.08 – 7.02 (m, 1H), 6.88 – 6.81 (m, 2H), 6.64 – 6.59 (m, 1H), 4.74 (dd,  $J = 6.4, 8.4$  Hz, 1H), 4.65 (t,  $J = 7.2$  Hz, 1H), 3.00 – 2.89 (m, 1H), 2.35 – 2.25 (m, 1H).  $^{13}C\{^1H\}$  NMR (100 MHz,  $CDCl_3$ )  $\delta$  198.2, 148.3, 147.1, 143.3, 137.0, 133.7, 133.1, 132.1, 128.9, 128.9, 128.8, 128.5, 127.8, 125.8, 125.0, 124.5, 121.8, 121.4, 116.1, 91.0, 70.2, 55.8, 40.1. HRMS (FTMS+c ESI) calcd for  $C_{29}H_{23}^{79}BrNO_2S^+$  ( $[M]+H^+$ ) =

512.0678, Found 512.0676; calcd for  $C_{29}H_{23}^{81}BrNO_2S^+$  ( $[M]+H^+$ ) = 514.0658, Found 514.0650; IR (neat): 3059, 1681, 1588, 1487, 1465, 1355, 1261, 1219, 1010, 823, 749, 696  $cm^{-1}$



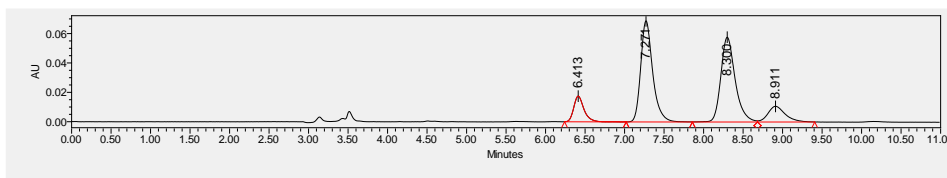

|   | Retention Time | Area   | % Area |
|---|----------------|--------|--------|
| 4 | 8.911          | 162192 | 9.14   |
| 1 | 6.413          | 158368 | 8.93   |
| 2 | 7.271          | 726921 | 40.98  |
| 3 | 8.300          | 726559 | 40.96  |

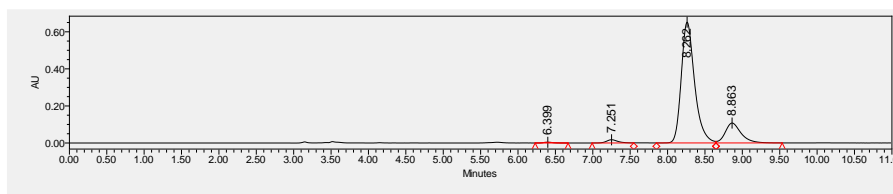

|   | Retention Time | Area    | % Area |
|---|----------------|---------|--------|
| 1 | 6.399          | 33860   | 0.34   |
| 2 | 7.251          | 183340  | 1.86   |
| 3 | 8.262          | 8062309 | 81.84  |
| 4 | 8.863          | 1572321 | 15.96  |

### Phenyl[3a-phenyl-1-(*m*-tolyl)-1,2,3,3a-tetrahydrobenzo[*d*]pyrrolo[2,1-*b*]thiazol-3-yl]methanone (3ea)

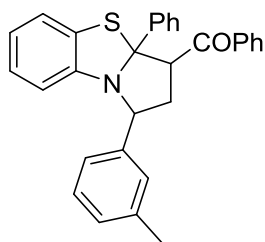

( $C_{30}H_{25}NOS$ ) Prepared according to the general procedure for 48h. 38.5 mg, 86% yield; yellow foam. Melting point: 92 – 96 °C.  $[\alpha]_D^{20} = +449.0$  (c 0.21,  $CH_2Cl_2$ ). 83:17 d.r. (determined by  $^1H$  NMR), 95% ee for the major isomer and 93% ee for the minor isomer. HPLC (Chiral IE column), *i*PrOH/*n*Hexane = 20/80, Flow rate: 1.0 mL/min, 227 nm,  $t_{major\ isomer} = 6.94$  min (major), 7.37 min (minor);  $t_{minor\ isomer} = 5.94$  min (major), 5.02 min (minor). Major isomer:  $^1H$  NMR (400 MHz,  $CDCl_3$ )  $\delta$  7.87 – 7.80 (m, 4H), 7.58 – 7.52 (m, 1H), 7.52 – 7.46 (m, 1H), 7.46 – 7.41 (m, 3H), 7.37 – 7.35 (m, 1H), 7.32 – 7.26 (m, 2H), 7.24 – 7.19 (m, 1H), 7.18 – 7.13 (m, 1H), 7.06 – 7.02 (m, 1H), 6.86 – 6.81 (m, 2H), 6.69 – 6.65 (m, 1H), 4.75 (dd,  $J = 6.0, 8.0$  Hz, 1H), 4.67 (t,  $J = 7.2$  Hz, 1H), 2.99 – 2.90 (m, 1H), 2.41 (s, 3H), 2.39 – 2.31 (m, 1H).

$^{13}C\{^1H\}$  NMR (100 MHz,  $CDCl_3$ )  $\delta$  198.4, 148.6, 147.4, 144.3, 138.5, 137.1, 133.6, 133.1, 128.9, 128.8, 128.8, 128.4, 128.3, 127.9, 127.7, 126.0, 124.9, 124.3, 124.2, 121.7, 116.2, 91.1, 70.8, 56.0, 40.3, 21.8. HRMS (FTMS+c ESI) calcd for  $C_{30}H_{26}NOS^+$  ( $[M]+H^+$ ) = 448.1730, Found; 448.1733; IR (neat): 3057, 1681, 1587, 1450, 1353, 1263, 1218, 1023, 734, 698  $cm^{-1}$

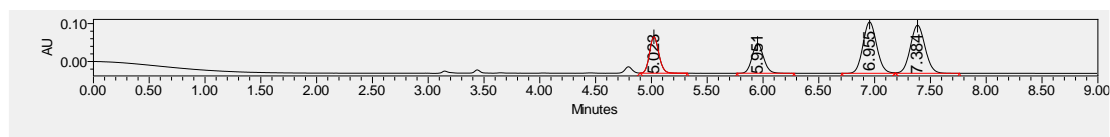

|   | Retention Time | Area    | % Area |
|---|----------------|---------|--------|
| 1 | 5.023          | 561703  | 16.31  |
| 2 | 5.951          | 560190  | 16.27  |
| 3 | 6.955          | 1160817 | 33.71  |
| 4 | 7.384          | 1160639 | 33.71  |

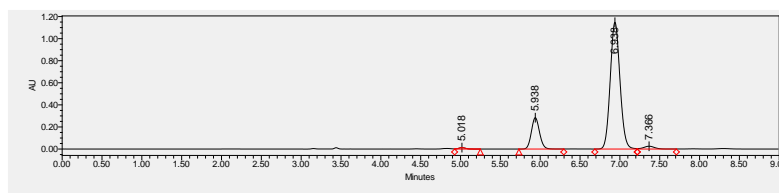

|   | Retention Time | Area    | % Area |
|---|----------------|---------|--------|
| 1 | 5.018          | 77255   | 0.64   |
| 2 | 5.938          | 2016529 | 16.65  |
| 3 | 6.938          | 9773090 | 80.69  |
| 4 | 7.366          | 245319  | 2.03   |

### {1-(3-Chlorophenyl)-3a-phenyl-1,2,3,3a-tetrahydrobenzo[*d*]pyrrolo[2,1-*b*]thiazol-3-yl}(phenyl)methanone (3fa)

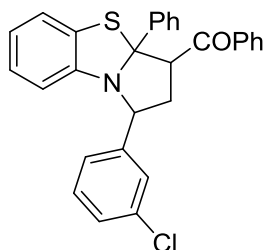

( $C_{29}H_{22}ClNOS$ ) Prepared according to the general procedure for 72 h. 33.8 mg, 72% yield; yellow foam. Melting point: 70 – 73 °C.  $[\alpha]_D^{20} = +441.3$  (c 1.04,  $CH_2Cl_2$ ). 83:17 d.r. (determined by  $^1H$  NMR), 96% ee for the major isomer and 88% ee for the minor isomer. HPLC (Chiral IE column), *i*PrOH/*n*Hexane =

20/80, Flow rate: 1.0 mL/min, 227 nm,  $t_{\text{major isomer}} = 6.82$  min (major), 7.18 min (minor);  $t_{\text{minor isomer}} = 6.07$  min (major), 5.21 min (minor). Major isomer:  $^1\text{H NMR}$  (400 MHz,  $\text{CDCl}_3$ )  $\delta$  7.88 – 7.83 (m, 2H), 7.81 – 7.76 (m, 2H), 7.62 – 7.54 (m, 2H), 7.49 – 7.42 (m, 3H), 7.39 – 7.35 (m, 1H), 7.35 – 7.28 (m, 3H), 7.25 – 7.19 (m, 1H), 7.08 – 7.03 (m, 1H), 6.89 – 6.81 (m, 2H), 6.68 – 6.61 (m, 1H), 4.75 (dd,  $J = 6.4, 8.4$  Hz, 1H), 4.66 (t,  $J = 7.6$  Hz, 1H), 3.00 – 2.84 (m, 1H), 2.36 – 2.26 (m, 1H).  $^{13}\text{C}\{^1\text{H}\}$  NMR (100 MHz,  $\text{CDCl}_3$ )  $\delta$  198.2, 148.3, 147.0, 146.5, 137.0, 134.8, 133.7, 133.1, 130.3, 128.9, 128.8, 127.9, 127.8, 127.3, 125.8, 125.3, 125.0, 124.6, 121.8, 116.1, 91.0, 70.3, 55.8, 40.1. HRMS (FTMS+c ESI) calcd for  $\text{C}_{29}\text{H}_{23}^{37}\text{ClNO}_2\text{S}^+$  ( $[\text{M}]+\text{H}^+$ ) = 468.1183, Found 468.1185; calcd for  $\text{C}_{29}\text{H}_{23}^{37}\text{ClNO}_2\text{S}^+$  ( $[\text{M}]+\text{H}^+$ ) = 470.1154, Found 470.1156; IR (neat): 3060, 1680, 1592, 1576, 1466, 1451, 1352, 1262, 1218, 1023, 752, 695  $\text{cm}^{-1}$

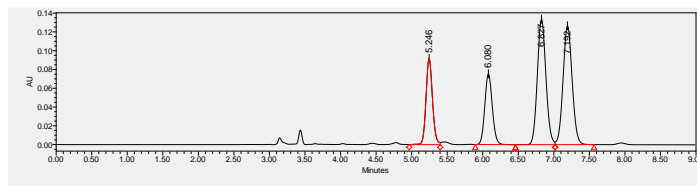

|   | Retention Time | Area    | % Area |
|---|----------------|---------|--------|
| 1 | 5.246          | 577917  | 17.08  |
| 2 | 6.080          | 552347  | 16.32  |
| 3 | 6.827          | 1124629 | 33.23  |
| 4 | 7.192          | 1129254 | 33.37  |

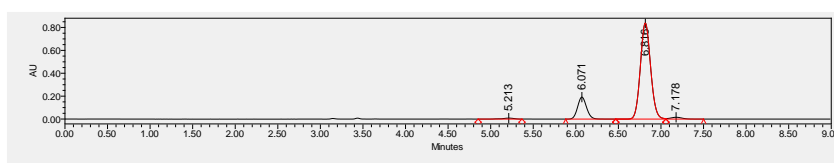

|   | Retention Time | Area    | % Area |
|---|----------------|---------|--------|
| 1 | 5.213          | 88722   | 1.03   |
| 2 | 6.071          | 1402081 | 16.22  |
| 3 | 6.816          | 7004487 | 81.01  |
| 4 | 7.178          | 151138  | 1.75   |

**{1-(3-Methoxyphenyl)-3a-phenyl-1,2,3,3a-tetrahydrobenzo[d]pyrrolo[2,1-b]thiazol-3-yl}(phenyl)methanone (3ga)**

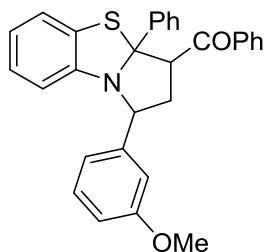

( $\text{C}_{30}\text{H}_{25}\text{NO}_2\text{S}$ ) Prepared according to the general procedure for 36 h. 35.6 mg, 77% yield; yellow foam. Melting point: 65 – 70 °C.  $[\alpha]_D^{20} = +495.0$  ( $c$  0.62,  $\text{CH}_2\text{Cl}_2$ ). 90:10 d.r. (determined by  $^1\text{H NMR}$ ), 95% ee for the major isomer and 93% ee for the minor isomer. HPLC (Chiral IE column),  $i\text{PrOH}/n\text{Hexane} = 10/90$ , Flow rate: 1.0 mL/min, 227 nm,  $t_{\text{major isomer}} = 11.15$  min (major), 12.12 min (minor);  $t_{\text{minor isomer}} = 10.60$  min (major), 7.95 min (minor). Major isomer:  $^1\text{H NMR}$  (400 MHz,  $\text{CDCl}_3$ )  $\delta$  7.89 – 7.84 (m, 2H), 7.84 – 7.78 (m, 2H), 7.59 – 7.53 (m, 1H), 7.47 – 7.41 (m, 2H), 7.38 – 7.33 (m, 1H), 7.33 – 7.27 (m, 2H), 7.24 – 7.20 (m, 1H), 7.19 – 7.15 (m, 2H), 7.06 – 7.02 (m, 1H), 6.91 – 6.87 (m, 1H), 6.87 – 6.83 (m, 2H), 6.72 – 6.68 (m, 1H), 4.77 (dd,  $J = 6.0, 8.4$  Hz, 1H), 4.68 (t,  $J = 7.2$  Hz, 1H), 3.82 (s, 3H), 3.01 – 2.91 (m, 1H), 2.41 – 2.31 (m, 1H).  $^{13}\text{C}\{^1\text{H}\}$  NMR (100 MHz,  $\text{CDCl}_3$ )  $\delta$  198.4, 160.1, 148.6, 147.4, 146.1, 137.1, 133.6, 133.0, 130.0, 128.9, 128.8, 128.5, 127.7, 125.9, 125.0, 124.3, 121.6, 119.4, 116.0, 113.0, 112.6, 90.8, 70.8, 55.9, 55.4, 40.3. HRMS (FTMS+c ESI) calcd for  $\text{C}_{30}\text{H}_{26}\text{NO}_2\text{S}^+$  ( $[\text{M}]+\text{H}^+$ ) = 464.1679, Found 464.1682; IR (neat): 3058, 1680, 1590, 1463, 1261, 1219, 1044, 754, 697  $\text{cm}^{-1}$

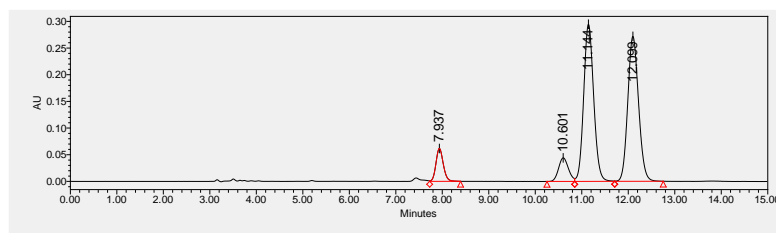

|   | Retention Time | Area    | % Area |
|---|----------------|---------|--------|
| 1 | 7.937          | 673683  | 6.67   |
| 2 | 10.601         | 649230  | 6.43   |
| 3 | 11.144         | 4399681 | 43.55  |
| 4 | 12.099         | 4380807 | 43.36  |

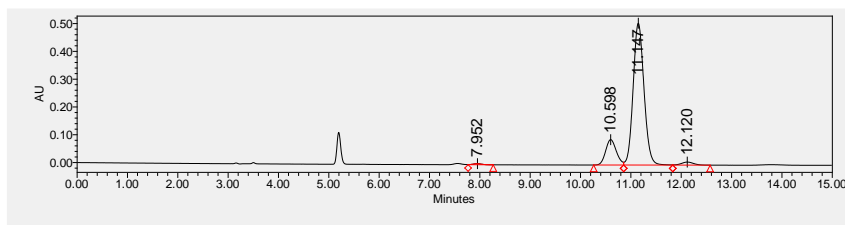

|   | Retention Time | Area    | % Area |
|---|----------------|---------|--------|
| 1 | 7.952          | 47778   | 0.52   |
| 2 | 10.598         | 1346033 | 14.59  |
| 3 | 11.147         | 7647241 | 82.91  |
| 4 | 12.120         | 182846  | 1.98   |

### {1-(3-Bromophenyl)-3a-phenyl-1,2,3,3a-tetrahydrobenzo[d]pyrrolo[2,1-b]thiazol-3-yl}(phenyl)methanone (3ha)

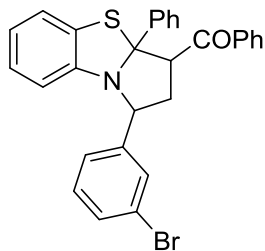

( $C_{29}H_{23}BrNOS$ ) Prepared according to the general procedure for 48 h. 41.5 mg, 81% yield; yellow foam. Melting point: 72 – 76 °C.  $[\alpha]_D^{20} = +394.1$  (c 0.66,  $CH_2Cl_2$ ). 82:18 d.r. (determined by  $^1H$  NMR), 96% ee for the major isomer and 90% ee for the minor isomer. HPLC (Chiral IE column), *n*PrOH/*n*Hexane = 20/80, Flow rate: 1.0 mL/min, 227 nm,  $t_{major\ isomer} = 7.03$  min (major), 7.45 min (minor);  $t_{minor\ isomer} = 6.21$  min (major), 5.36 min (minor). Major isomer:  $^1H$  NMR (400 MHz,  $CDCl_3$ )  $\delta$  7.88 – 7.83 (m, 2H), 7.81 – 7.74 (m, 3H), 7.57 – 7.50 (m, 2H), 7.48 – 7.42 (m, 3H), 7.34 – 7.28 (m, 3H), 7.26 – 7.20 (m, 1H), 7.08 – 7.02 (m, 1H), 6.88 – 6.82 (m, 2H), 6.68 – 6.61 (m, 1H), 4.75 (dd,  $J = 6.0, 8.0$  Hz, 1H), 4.66 (t,  $J = 7.2$  Hz, 1H), 3.00 – 2.83 (m, 1H), 2.36 – 2.26 (m, 1H).  $^{13}C\{^1H\}$  NMR (100 MHz,  $CDCl_3$ )  $\delta$  198.2, 148.3, 147.0, 146.7, 137.0, 133.7, 133.0, 130.7, 130.6, 130.2, 128.9, 128.8, 128.5, 127.9, 125.8, 125.8, 125.1, 124.5, 123.1, 121.8, 116.1, 91.0, 70.2, 55.8, 40.1. HRMS (FTMS+c ESI) calcd for  $C_{29}H_{23}^{79}BrNO_2S^+$  ( $[M]+H^+$ ) = 512.0680, Found 512.0682; calcd for  $C_{29}H_{23}^{81}BrNO_2S^+$  ( $[M]+H^+$ ) = 514.0662, Found 514.0660; IR (neat): 3058, 1680, 1590, 1573, 1466, 1450, 1351, 1262, 1218, 734, 696  $cm^{-1}$ .

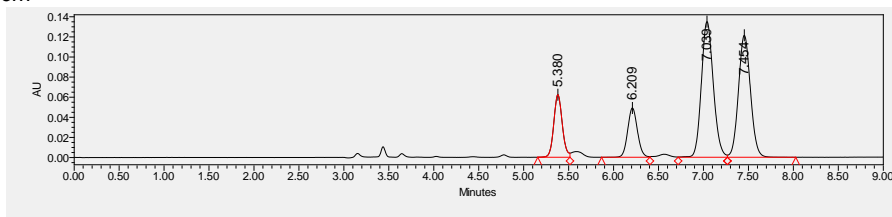

|   | Retention Time | Area    | % Area |
|---|----------------|---------|--------|
| 1 | 5.380          | 409214  | 12.96  |
| 2 | 6.209          | 371389  | 11.76  |
| 3 | 7.039          | 1247748 | 39.51  |
| 4 | 7.454          | 1129612 | 35.77  |

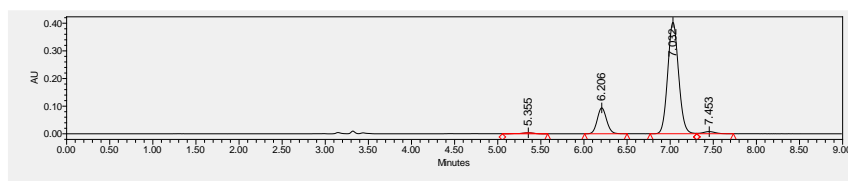

|   | Retention Time | Area    | % Area |
|---|----------------|---------|--------|
| 1 | 5.355          | 35534   | 0.82   |
| 2 | 6.206          | 702822  | 16.22  |
| 3 | 7.032          | 3520070 | 81.21  |
| 4 | 7.453          | 75840   | 1.75   |

### Phenyl{3a-phenyl-1-(*o*-tolyl)-1,2,3,3a-tetrahydrobenzo[d]pyrrolo[2,1-b]thiazol-3-yl}methanone (3ia)

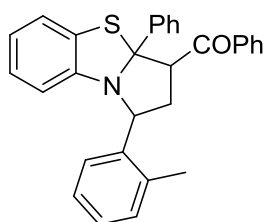

( $C_{30}H_{25}NOS$ ) Prepared according to the general procedure for 48 h. 36.7 mg, 82% yield; yellow foam. Melting point: 60 – 64 °C.  $[\alpha]_D^{20} = +419.7$  (c 0.79,  $CH_2Cl_2$ ). 87:13 d.r. (determined by  $^1H$  NMR), 92% ee for the major isomer and 92% ee for the minor isomer. HPLC (Chiral ID column), *n*PrOH/*n*Hexane = 20/80, Flow rate: 1.0 mL/min, 227 nm,  $t_{major\ isomer} = 8.04$  min (major), 5.82 min (minor);  $t_{minor\ isomer} = 6.98$  min (major), 5.40 min (minor). Major isomer:  $^1H$  NMR (400 MHz,  $CDCl_3$ )  $\delta$  8.13 – 8.06 (m, 1H), 7.89 – 7.79 (m, 4H), 7.57 – 7.52 (m, 1H), 7.44 – 7.38 (m, 2H), 7.38 – 7.33 (m, 1H), 7.32 – 7.27 (m, 2H), 7.26 – 7.18 (m, 3H), 7.14 – 7.09 (m, 1H), 6.92 – 6.85 (m, 1H), 6.84 – 6.78 (m, 1H), 6.72 – 6.66 (m, 1H), 4.87 (dd,  $J = 5.2, 8.8$  Hz, 1H), 4.66 (dd,  $J = 7.6, 9.2$  Hz, 1H), 3.08 – 2.96 (m, 1H), 2.26 (s, 3H), 2.25 – 2.20 (m, 3H).  $^{13}C\{^1H\}$  NMR (100 MHz,  $CDCl_3$ )  $\delta$  198.3, 148.9, 147.0, 142.4, 136.8, 135.1, 134.2, 133.7, 130.8, 128.9, 128.8, 128.4, 127.7, 127.2, 127.2, 126.6, 126.5, 126.0, 125.0, 124.9, 122.0, 117.0, 91.6, 67.8, 55.6, 39.7, 19.7. HRMS (FTMS+c ESI)

calcd for  $C_{30}H_{26}NO_2S^+$  ( $[M]+H^+$ ) = 448.1730, Found 448.1734; **IR (neat)**: 3059, 1681, 1596, 1452, 1356, 1263, 1221, 1023, 754, 696  $cm^{-1}$

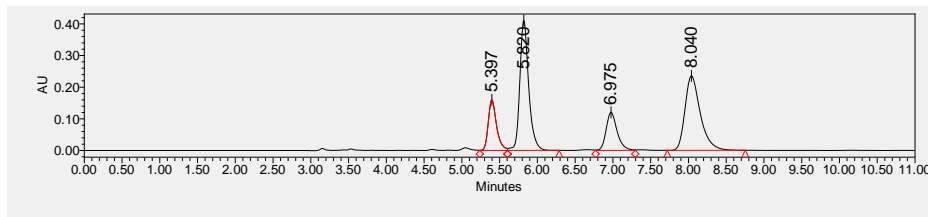

|   | Retention Time | Area    | % Area |
|---|----------------|---------|--------|
| 1 | 5.397          | 1216497 | 13.35  |
| 2 | 5.820          | 3362718 | 36.90  |
| 3 | 6.975          | 1218011 | 13.37  |
| 4 | 8.040          | 3314678 | 36.38  |

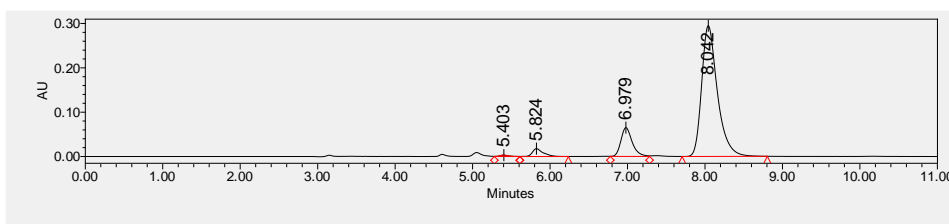

|   | Retention Time | Area    | % Area |
|---|----------------|---------|--------|
| 1 | 5.403          | 23865   | 0.48   |
| 2 | 5.824          | 171088  | 3.42   |
| 3 | 6.979          | 661569  | 13.21  |
| 4 | 8.042          | 4152477 | 82.90  |

**(1-(2-Methoxyphenyl)-3a-phenyl-1,2,3,3a-tetrahydrobenzo[d]pyrrolo[2,1-b]thiazol-3-yl)(phenyl)methanone (3ja)**

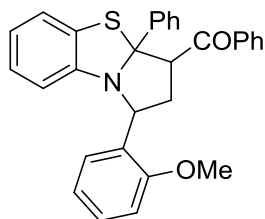

( $C_{30}H_{25}NO_2S$ ) Prepared according to the general procedure for 72 h. 32.4 mg, 70% yield; yellow foam. Melting point: 58 – 64 °C.  $[\alpha]_D^{20} = +423.0$  (c 0.59,  $CH_2Cl_2$ ). 84:16 d.r. (determined by  $^1H$  NMR), 91% ee for the major isomer and 89% ee for the minor isomer. **HPLC** (Chiral ID column), *i*PrOH/*n*Hexane = 20/80, Flow rate: 1.0 mL/min, 227 nm,  $t_{major\ isomer} = 13.25$  min (major), 8.29 min (minor);  $t_{minor\ isomer} = 7.67$  min (major), 5.71 min (minor). Major isomer:  $^1H$  NMR (400 MHz,  $CDCl_3$ )  $\delta$  8.05 – 7.99 (m, 1H), 7.87 – 7.78 (m, 4H), 7.54 – 7.47 (m, 1H), 7.41 – 7.30 (m, 3H), 7.29 – 7.23 (m, 2H), 7.21 – 7.16 (m, 1H), 7.16 – 7.12 (m, 1H), 7.10 – 7.06 (m, 1H), 6.93 – 6.78 (m, 4H), 4.89 (dd,  $J = 3.6, 9.6$  Hz, 1H), 4.63 (dd,  $J = 7.6, 10.8$  Hz, 1H), 3.77 (s, 3H), 3.10 – 2.97 (m, 1H), 2.35 – 2.25 (m, 1H).  $^{13}C\{^1H\}$  NMR (100 MHz,  $CDCl_3$ )  $\delta$  198.4, 156.6, 149.4, 147.0, 136.8, 134.3, 133.5, 132.8, 128.8, 128.7, 128.4, 128.3, 127.6, 127.6, 126.0, 124.8, 124.8, 121.9, 120.6, 116.9, 110.5, 91.6, 66.4, 56.0, 55.3, 39.8, **HRMS (FTMS+c ESI)** calcd for  $C_{30}H_{26}NO_2S^+$  ( $[M]+H^+$ ) = 464.1679, Found 464.1678; **IR (neat)**: 3059, 1681, 1594, 1487, 1455, 1357, 1237, 1026, 754, 696  $cm^{-1}$

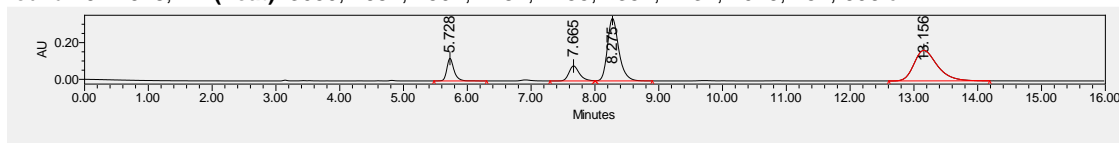

|   | Retention Time | Area    | % Area |
|---|----------------|---------|--------|
| 1 | 5.728          | 962681  | 9.32   |
| 2 | 7.665          | 933555  | 9.04   |
| 3 | 8.275          | 4208913 | 40.76  |
| 4 | 13.156         | 4221971 | 40.88  |

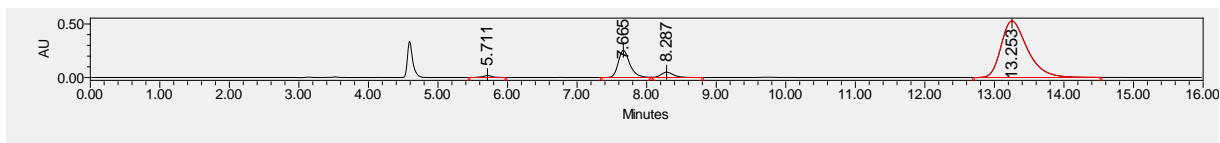

|   | Retention Time | Area     | % Area |
|---|----------------|----------|--------|
| 1 | 5.711          | 175957   | 1.00   |
| 2 | 7.665          | 2950777  | 16.78  |
| 3 | 8.287          | 631064   | 3.59   |
| 4 | 13.253         | 13832051 | 78.64  |

**[1-(2-Bromophenyl)-3a-phenyl-1,2,3,3a-tetrahydrobenzo[d]pyrrolo[2,1-b]thiazol-3-yl](phenyl)methanone (3ka)**

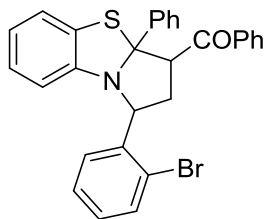

( $C_{29}H_{22}BrNO_2S$ ) Prepared according to the general procedure for 96 h. 45.6 mg, 89% yield; yellow foam. Melting point: 75 – 80 °C.  $[\alpha]_D^{20} = +387.9$  (c 0.73,  $CH_2Cl_2$ ). 87:13 d.r. (determined by  $^1H$  NMR), 87% ee for the major isomer and 68% ee for the minor isomer. HPLC (Chiral ID column),  $iPrOH/nHexane = 20/80$ , Flow rate: 1.0 mL/min, 227 nm,  $t_{major\ isomer} = 14.15$  min (major), 7.53 min (minor);  $t_{minor\ isomer} = 6.45$  min (major), 5.41 min (minor). Major isomer:  $^1H$  NMR (400 MHz,  $CDCl_3$ )  $\delta$  8.19 – 8.13 (m, 1H), 7.85 – 7.78 (m, 4H), 7.63 – 7.58 (m, 1H), 7.56 – 7.50 (m, 1H), 7.49 – 7.43 (m, 1H), 7.42 – 7.36 (m, 2H), 7.32 – 7.25 (m, 2H), 7.24 – 7.17 (m, 2H), 7.17 – 7.12 (m, 1H), 6.95 – 6.83 (m, 2H), 6.77 – 6.72 (m, 1H), 4.95 (dd,  $J = 3.6, 9.2$  Hz, 1H), 4.62 (dd,  $J = 7.6, 10.4$  Hz, 1H), 3.22 – 3.09 (m, 1H), 2.36 – 2.25 (m, 1H).  $^{13}C\{^1H\}$  NMR (100 MHz,  $CDCl_3$ )  $\delta$  198.0, 148.7, 146.6, 143.5, 136.7, 134.2, 133.7,

133.4, 129.0, 128.9 (2C), 128.7 (2C), 128.6, 128.4 (2C), 127.9, 127.8, 125.8 (2C), 125.2, 125.1, 122.9, 122.1, 116.9, 91.5, 70.6, 55.2, 39.9. HRMS (FTMS+c ESI) calcd for  $C_{29}H_{23}^{79}BrNO_2S^+$  ( $[M]+H^+$ ) = 512.0678, Found; 512.0680; calcd for  $C_{29}H_{23}^{81}BrNO_2S^+$  ( $[M]+H^+$ ) = 514.0658, Found 514.0660; IR (neat): 3059, 1681, 1588, 1451, 1353, 1260, 1220, 1022, 753, 695  $cm^{-1}$

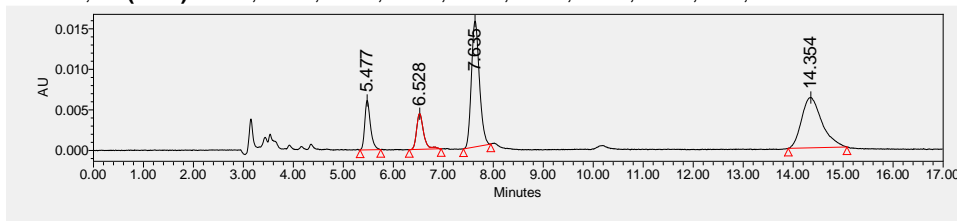

|   | Retention Time | Area   | % Area |
|---|----------------|--------|--------|
| 1 | 5.477          | 48202  | 10.98  |
| 2 | 6.528          | 42833  | 9.76   |
| 3 | 7.635          | 172579 | 39.32  |
| 4 | 14.354         | 175279 | 39.94  |

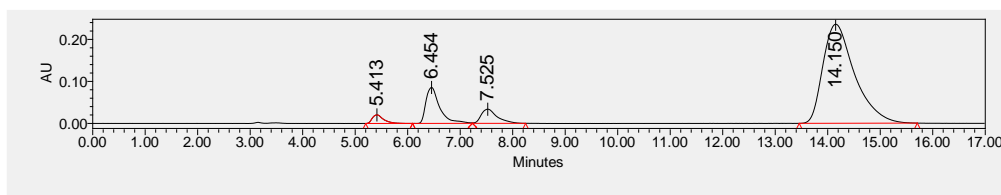

|   | Retention Time | Area    | % Area |
|---|----------------|---------|--------|
| 1 | 5.413          | 304335  | 2.44   |
| 2 | 6.454          | 1569187 | 12.58  |
| 3 | 7.525          | 715087  | 5.73   |
| 4 | 14.150         | 9885164 | 79.25  |

**[1-(3,4-Dichlorophenyl)-3a-phenyl-1,2,3,3a-tetrahydrobenzo[d]pyrrolo[2,1-b]thiazol-3-yl](phenyl)methanone (3la)**

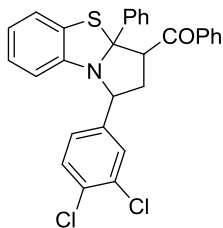

( $C_{29}H_{21}Cl_2NOS$ ) Prepared according to the general procedure for 72 h. 38.5 mg, 77% yield; yellow foam. Melting point: 70 – 74 °C.  $[\alpha]_D^{20} = +487.9$  (c 0.24,  $CH_2Cl_2$ ). 83:17 d.r. (determined by  $^1H$  NMR), 96% ee for the major isomer and 90% ee for the minor isomer. HPLC (Chiral IE column),  $iPrOH/nHexane = 10/90$ , Flow rate: 1.0 mL/min, 227 nm,  $t_{major\ isomer} = 8.35$  min (major), 8.77 min (minor);  $t_{minor\ isomer} = 7.55$  min (major), 6.26 min (minor). Major isomer:  $^1H$  NMR (400 MHz,  $CDCl_3$ )  $\delta$  7.88 – 7.83 (m, 2H), 7.80 – 7.75 (m, 2H), 7.71 – 7.67 (m, 1H), 7.58 – 7.54 (m, 1H), 7.52 – 7.48 (m, 1H), 7.48 – 7.46 (m, 1H), 7.46 – 7.41 (m, 2H), 7.36 – 7.29 (m, 2H), 7.26 – 7.22 (m, 1H), 7.07 – 7.01 (m, 1H), 6.89 – 6.82 (m, 2H), 6.66 – 6.59 (m, 1H), 4.74 (dd,  $J = 6.0, 8.0$  Hz, 1H), 4.66 (t,  $J = 7.2$  Hz, 1H), 3.00 – 2.90 (m, 1H), 2.32 – 2.23 (m, 1H).  $^{13}C\{^1H\}$  NMR (100 MHz,  $CDCl_3$ )  $\delta$  198.1, 148.1, 146.9, 144.7, 137.0, 133.7, 133.1, 133.0, 131.6, 131.0, 129.1, 129.0, 128.8, 128.6, 128.6, 128.0, 126.5, 125.8,

125.1, 124.7, 121.9, 116.0, 90.9, 69.8, 55.6, 40.0. HRMS (FTMS+c ESI) calcd for  $C_{29}H_{22}^{35}Cl^{35}ClNOS^+$  ( $[M]+H^+$ ) = 502.0794, Found 502.0790; calcd for  $C_{29}H_{22}^{35}Cl^{37}ClNOS^+$  ( $[M]+H^+$ ) = 504.0764, Found 504.0760; calcd for  $C_{29}H_{22}^{37}Cl^{37}ClNOS^+$  ( $[M]+H^+$ ) = 506.0735, Found 506.0742; IR (neat): 3060, 1682, 1588, 1467, 1351, 1263, 1220, 1027, 737, 698  $cm^{-1}$

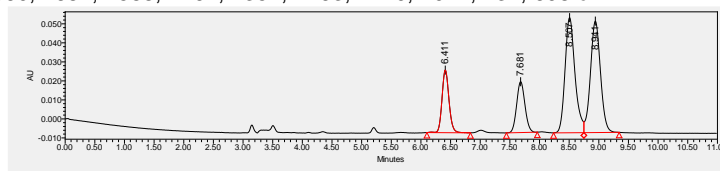

|   | Retention Time | Area   | % Area |
|---|----------------|--------|--------|
| 1 | 6.411          | 269767 | 14.02  |
| 2 | 7.681          | 259545 | 13.49  |
| 3 | 8.507          | 706829 | 36.73  |
| 4 | 8.941          | 688392 | 35.77  |

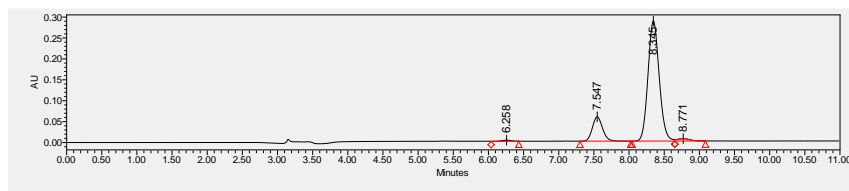

|   | Retention Time | Area    | % Area |
|---|----------------|---------|--------|
| 1 | 6.258          | 30665   | 0.79   |
| 2 | 7.547          | 583645  | 15.09  |
| 3 | 8.345          | 3186074 | 82.35  |
| 4 | 8.771          | 68476   | 1.77   |

**[1-(Naphthalen-1-yl)-3a-phenyl-1,2,3,3a-tetrahydrobenzo[d]pyrrolo[2,1-b]thiazol-3-yl](phenyl)methanone (3ma)**

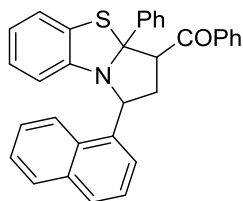

( $C_{33}H_{25}NOS$ ) Prepared according to the general procedure for 48 h. 40.6 mg, 84% yield; yellow foam. Melting point: 91 – 93 °C.  $[\alpha]_D^{20} = +511.3$  (c 0.68,  $CH_2Cl_2$ ). 94:6 d.r. (determined by  $^1H$  NMR), 95% ee for the major isomer and 90% ee for the minor isomer. HPLC (Chiral ID column),  $iPrOH/nHexane = 20/80$ , Flow rate: 1.0 mL/min, 227 nm,  $t_{major\ isomer} = 13.35$  min (major), 10.90 min (minor);  $t_{minor\ isomer} = 8.42$  min (major), 6.48 min (minor). Major isomer:  $^1H$  NMR (400 MHz,  $CDCl_3$ )  $\delta$  8.42 – 8.35 (m, 1H), 7.95 – 7.89 (m, 4H), 7.89 – 7.85 (m, 1H), 7.80 – 7.74 (m, 2H), 7.65 – 7.59 (m, 1H), 7.53 – 7.43 (m, 3H), 7.38 – 7.28 (m, 4H), 7.25 – 7.22 (m, 1H), 7.19 – 7.15 (m, 1H), 6.94 – 6.86 (m, 1H), 6.84 – 6.77 (m, 2H), 5.38 (dd,  $J = 4.0$ , 9.6 Hz, 1H), 4.68 (dd,  $J = 7.2$ , 10.4 Hz, 1H), 3.37 – 3.18 (m, 1H), 2.47 – 2.35 (m, 1H).  $^{13}C\{^1H\}$  NMR (100 MHz,  $CDCl_3$ )  $\delta$  198.2, 149.1, 146.8, 140.0, 136.6, 134.4, 134.2, 133.7, 130.6, 129.1, 128.9, 128.7, 128.4, 128.1, 127.8, 126.4, 126.0, 125.9, 125.8, 125.1, 125.0, 123.9, 123.4, 122.1, 117.1, 91.6, 68.2, 55.8, 40.6. HRMS (FTMS+c ESI) calcd for  $C_{33}H_{26}NOS^+$  ( $[M]+H^+$ ) = 484.1730, Found 448.1734; IR (neat): 3058, 1680, 1593, 1451, 1260, 1221, 734, 696  $cm^{-1}$

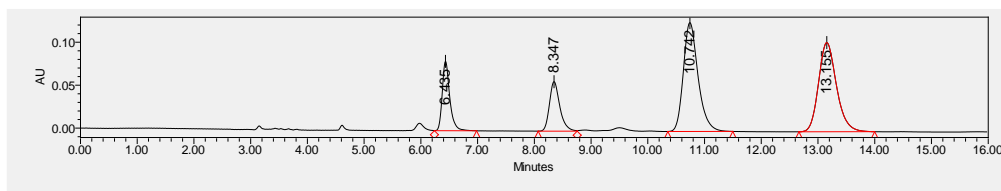

|   | Retention Time | Area    | % Area |
|---|----------------|---------|--------|
| 1 | 6.435          | 744183  | 12.34  |
| 2 | 8.347          | 731975  | 12.14  |
| 3 | 10.742         | 2282596 | 37.85  |
| 4 | 13.155         | 2271765 | 37.67  |

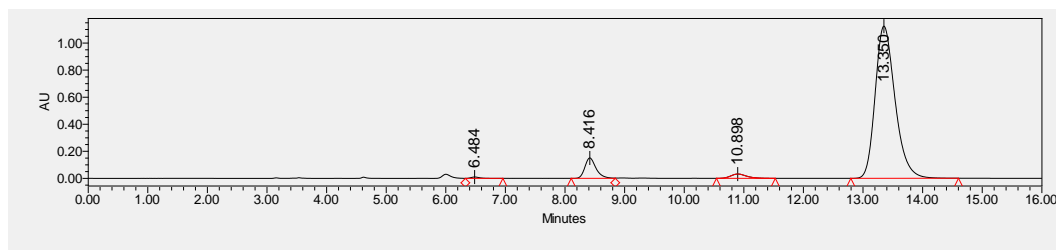

|   | Retention Time | Area     | % Area |
|---|----------------|----------|--------|
| 3 | 10.898         | 587313   | 2.05   |
| 1 | 6.484          | 104522   | 0.37   |
| 2 | 8.416          | 1958224  | 6.84   |
| 4 | 13.350         | 25985981 | 90.75  |

**[1-(Naphthalen-2-yl)-3a-phenyl-1,2,3,3a-tetrahydrobenzo[d]pyrrolo[2,1-b]thiazol-3-yl](phenyl)methanone (3na)**

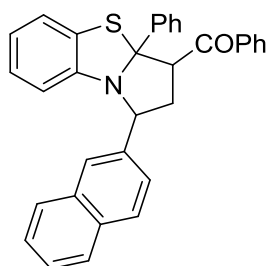

( $C_{33}H_{25}NOS$ ) Prepared according to the general procedure for 48 h. 33.8 mg, 70% yield; yellow foam. Melting point: 76 – 79 °C.  $[\alpha]_D^{20} = +402.2$  (c 1.19,  $CH_2Cl_2$ ). 84:16 d.r. (determined by  $^1H$  NMR), 95% ee for the major isomer and 94% ee for the minor isomer. HPLC (Chiral ID column),  $iPrOH/nHexane = 20/80$ , Flow rate: 1.0 mL/min, 227 nm,  $t_{major\ isomer} = 9.80$  min (major), 8.16 min (minor);  $t_{minor\ isomer} = 11.52$  min (major), 7.54 min (minor). Major isomer:  $^1H$  NMR (400 MHz,  $CDCl_3$ )  $\delta$  8.05 (s, 1H), 7.93 – 7.83 (m, 7H), 7.73 – 7.68 (m, 1H), 7.54 – 7.48 (m, 3H), 7.44 – 7.38 (m, 2H), 7.36 – 7.28 (m, 2H), 7.26 – 7.20 (m, 1H), 7.08 – 7.03 (m, 1H), 6.87 – 6.75 (m, 2H), 6.68 – 6.63 (m, 1H), 4.93 (dd,  $J = 6.4$ , 8.4 Hz, 1H), 4.72 (t,  $J = 7.6$  Hz, 1H), 3.07 – 2.96 (m, 1H), 2.49 – 2.38 (m, 1H).  $^{13}C\{^1H\}$  NMR (100 MHz,  $CDCl_3$ )  $\delta$  198.3, 148.5, 147.4, 141.6, 137.0, 133.6, 133.5, 133.2, 133.1, 128.9, 128.9, 128.8, 128.5, 128.2, 127.9, 127.8, 126.5, 126.1, 126.0, 125.9, 125.1, 125.0, 124.4, 121.7, 116.3, 91.1, 70.9, 56.0, 40.1. HRMS

(FTMS+c ESI) calcd for  $C_{33}H_{26}NOS^+$  ( $[M]+H^+$ ) = 484.1730, Found 484.1728; IR (neat): 3057, 1680, 1464, 1450, 1264, 1219, 749, 695  $cm^{-1}$

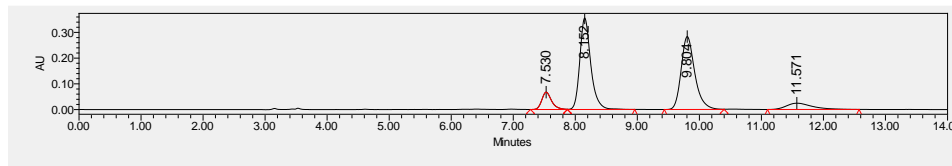

|   | Retention Time | Area    | % Area |
|---|----------------|---------|--------|
| 1 | 7.530          | 743715  | 7.32   |
| 2 | 8.152          | 4372547 | 43.05  |
| 3 | 9.804          | 4329819 | 42.63  |
| 4 | 11.571         | 709724  | 6.99   |

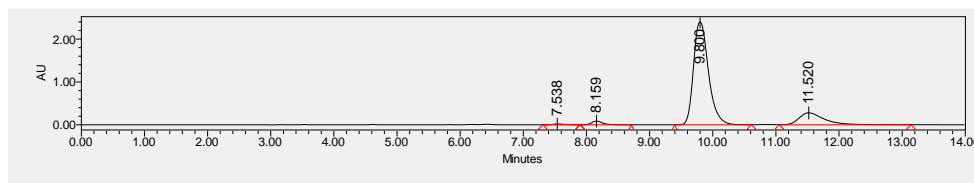

|   | Retention Time | Area     | % Area |
|---|----------------|----------|--------|
| 1 | 7.538          | 236917   | 0.49   |
| 2 | 8.159          | 1067791  | 2.20   |
| 3 | 9.800          | 39500358 | 81.23  |
| 4 | 11.520         | 7824128  | 16.09  |

**Phenyl(3a-phenyl-1-vinyl-1,2,3,3a-tetrahydrobenzo[d]pyrrolo[2,1-b]thiazol-3-yl)methanone (3oa)**

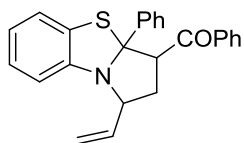

( $C_{25}H_{21}NOS$ ) Prepared according to the general procedure for 96 h. 13.9 mg, 36% yield; yellow oil.  $[\alpha]_D^{20} = +443.2$  (c 0.22,  $CH_2Cl_2$ ). 85:15 d.r. (determined by  $^1H$  NMR), 93% ee for the major isomer and 95% ee for the minor isomer. HPLC (Chiral ADH column), *i*PrOH/*n*Hexane = 10/90, Flow rate: 1.0 mL/min, 227 nm,  $t_{major\ isomer} = 6.23$  min (major), 7.16 min (minor);  $t_{minor\ isomer} = 9.12$  min (major), 5.12 min (minor). Major isomer:  $^1H$  NMR (400 MHz,  $CDCl_3$ )  $\delta$  7.93 – 7.88 (m, 2H), 7.74 – 7.68 (m, 2H), 7.62 – 7.56 (m, 1H), 7.50 – 7.44 (m, 2H), 7.33 – 7.27 (m, 2H), 7.24 – 7.18 (m, 1H), 7.02 – 6.92 (m, 3H), 6.84 – 6.79 (m, 1H), 6.23 – 6.08 (m, 1H), 5.60 – 5.52 (m, 1H), 5.33 – 5.28 (m, 1H), 4.55 (t,  $J = 6.8$  Hz, 1H), 4.30 (dd,  $J = 6.8, 14.0$  Hz, 1H), 2.69 – 2.59 (m, 1H), 2.15 – 2.05 (m, 1H).  $^{13}C\{^1H\}$  NMR (100 MHz,  $CDCl_3$ )  $\delta$  198.5, 148.7, 147.8, 141.1, 137.3, 133.5, 132.0, 128.9, 128.7, 128.4, 127.6, 125.7, 125.0, 123.3, 121.3, 116.4, 114.7, 90.3, 69.5, 56.1, 36.9. HRMS (FTMS+c ESI) calcd for  $C_{25}H_{22}NOS^+$  ( $[M]+H^+$ ) = 384.1417, Found 384.1418; IR (neat): 3060, 1681, 1579, 1467, 1264, 1219, 1022, 994, 931, 753, 697  $cm^{-1}$

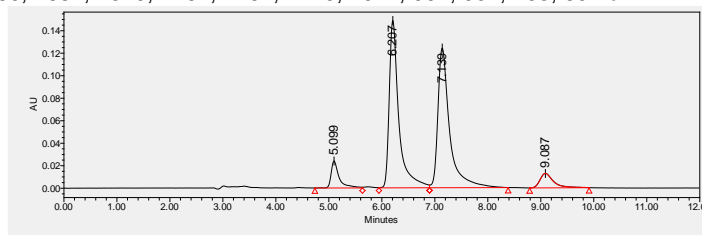

|   | Retention Time | Area    | % Area |
|---|----------------|---------|--------|
| 1 | 5.099          | 252937  | 5.92   |
| 2 | 6.207          | 1874459 | 43.88  |
| 3 | 7.139          | 1916659 | 44.86  |
| 4 | 9.087          | 228144  | 5.34   |

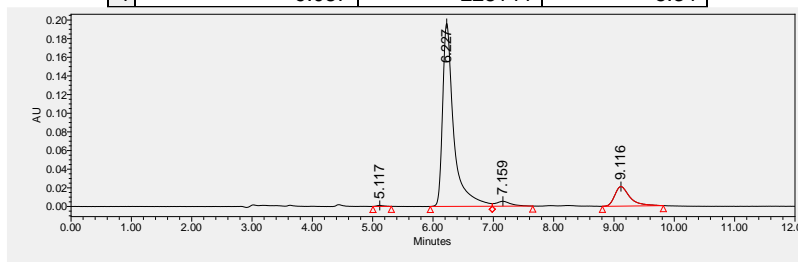

|   | Retention Time | Area | % Area |
|---|----------------|------|--------|
| 1 | 5.117          | 9001 | 0.30   |

|   |       |         |       |
|---|-------|---------|-------|
| 2 | 6.227 | 2519020 | 84.36 |
| 3 | 7.159 | 91123   | 3.05  |
| 4 | 9.116 | 366736  | 12.28 |

**(4-Fluorophenyl){3a-(4-fluorophenyl)-1-phenyl-1,2,3,3a-tetrahydrobenzo[d]pyrrolo[2,1-b]thiazol-3-yl)methanone (3pa)**

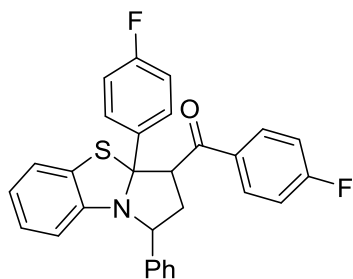

**(C<sub>29</sub>H<sub>21</sub>F<sub>2</sub>NOS)** Prepared according to the general procedure for 48 h. 40.4 mg, 86% yield; yellow foam. Melting point: 58 – 62 °C.  $[\alpha]^{20}_D = +404.6$  (c 0.68, CH<sub>2</sub>Cl<sub>2</sub>). 77:23 d.r. (determined by <sup>1</sup>H NMR), 96% ee for the major isomer and 97% ee for the minor isomer. **HPLC** (Chiral **IA** column), *i*PrOH/*n*Hexane = 10/90, Flow rate: 1.0 mL/min, 227 nm, *t*<sub>major isomer</sub> = 7.04 min (major), 6.58 min (minor); *t*<sub>minor isomer</sub> = 13.03 min (major), 6.15 min (minor). Major isomer: **<sup>1</sup>H NMR** (400 MHz, CDCl<sub>3</sub>) δ 7.88 – 7.76 (m, 4H), 7.61 – 7.55 (m, 2H), 7.48 – 7.42 (m, 3H), 7.13 – 7.05 (m, 3H), 7.00 – 6.93 (m, 2H), 6.91 – 6.80 (m, 2H), 6.69 – 6.65 (m, 1H), 4.69 (dd, *J* = 5.2, 8.4 Hz, 1H), 4.55 (t, *J* = 8.0 Hz, 1H), 3.04 – 2.95 (m, 1H), 2.43 – 2.34 (m, 1H). **<sup>13</sup>C{<sup>1</sup>H} NMR** (100 MHz, CDCl<sub>3</sub>) δ 196.4, 166.1 (d, *J* = 254.7 Hz), 162.2 (d, *J* = 245.3 Hz), 148.4, 144.1, 142.6 (d, *J* = 2.9 Hz), 133.4, 133.2 (d, *J* = 3.1 Hz), 131.3 (d, *J* = 9.3 Hz), 129.0, 129.0, 128.2, 127.8 (d, *J* = 8.0 Hz), 127.7, 127.1, 125.1, 124.9, 121.9, 116.9, 116.0 (d, *J* = 21.8 Hz), 115.0 (d, *J* = 21.4 Hz), 91.0, 70.6, 56.3, 40.3. **<sup>19</sup>F NMR** (376 MHz, Chloroform-*d*) δ -103.9, -114.9. **HRMS (FTMS+c ESI)** calcd for C<sub>29</sub>H<sub>22</sub>F<sub>2</sub>NOS<sup>+</sup> ([M]+H<sup>+</sup>) = 470.1385, Found 470.1376; **IR (neat)**: 3064, 1682, 1596, 1502, 1462, 1225, 1156, 835, 743, 701 cm<sup>-1</sup>

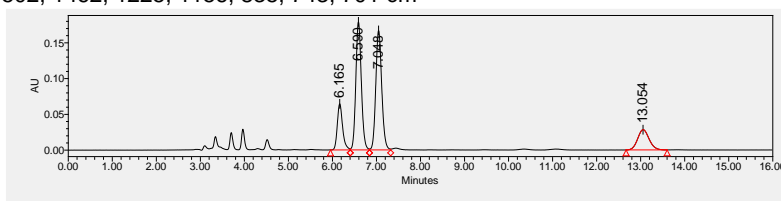

|   | Retention Time | Area    | % Area |
|---|----------------|---------|--------|
| 1 | 6.165          | 540557  | 12.96  |
| 2 | 6.590          | 1557441 | 37.33  |
| 3 | 7.048          | 1562679 | 37.46  |
| 4 | 13.054         | 511249  | 12.25  |

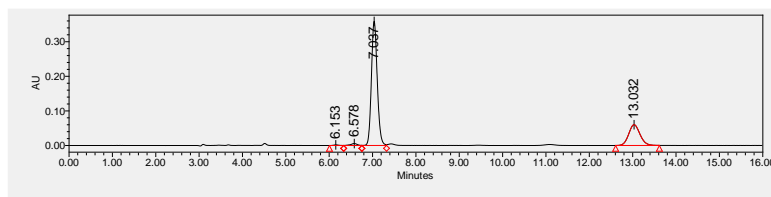

|   | Retention Time | Area    | % Area |
|---|----------------|---------|--------|
| 1 | 6.153          | 14738   | 0.33   |
| 2 | 6.578          | 59045   | 1.31   |
| 3 | 7.037          | 3355368 | 74.29  |
| 4 | 13.032         | 1087190 | 24.07  |

**1-(3a-Methyl-1-phenyl-1,2,3,3a-tetrahydrobenzo[d]pyrrolo[2,1-b]thiazol-3-yl)ethan-1-one (3qa)**

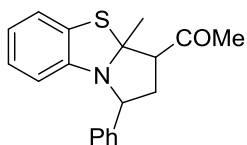

**(C<sub>25</sub>H<sub>21</sub>NOS)** Prepared according to the general procedure for 96 h. 20.0 mg, 65% yield; yellow oil.  $[\alpha]^{20}_D = +138.9$  (c 0.31, CH<sub>2</sub>Cl<sub>2</sub>). 53:47 d.r. (determined by <sup>1</sup>H NMR), 74% ee for the major isomer and 77% ee for the minor isomer. **HPLC** (Chiral **IE** column), *i*PrOH/*n*Hexane = 10/90, Flow rate: 1.0 mL/min, 227 nm, *t*<sub>major isomer</sub> = 5.63 min (major), 5.18 min (minor); *t*<sub>minor isomer</sub> = 7.30 min (major), 6.97 min (minor). Major isomer: **<sup>1</sup>H NMR** (400 MHz, CDCl<sub>3</sub>) δ 7.41 – 7.36 (m, 3H), 7.34 – 7.28 (m, 2H), 7.06 – 7.01 (m, 1H), 6.84 – 6.76 (m, 2H), 6.26 – 6.15 (m, 1H), 4.47 (dd, *J* = 6.8, 10.4 Hz, 1H), 3.75 (dd, *J* = 6.8, 12.8 Hz, 1H), 2.50 – 2.41 (m, 1H), 2.41 – 2.33 (m, 1H), 2.31 (s, 3H), 1.64 (s, 3H). **<sup>13</sup>C{<sup>1</sup>H} NMR** (100 MHz, CDCl<sub>3</sub>) δ 205.2, 148.7, 144.3, 132.2, 129.0, 127.6, 126.2, 125.4, 123.5, 121.7, 115.4, 82.8, 68.5, 60.5, 38.0, 33.6, 29.8. **HRMS (FTMS+c ESI)** calcd for C<sub>25</sub>H<sub>22</sub>NOS<sup>+</sup> ([M]+H<sup>+</sup>) = 310.1260, Found 310.1256; **IR (neat)**: 2969, 1710, 1579, 1466, 1360, 1272, 1264, 1219, 1169, 1133, 1029, 749, 702 cm<sup>-1</sup>

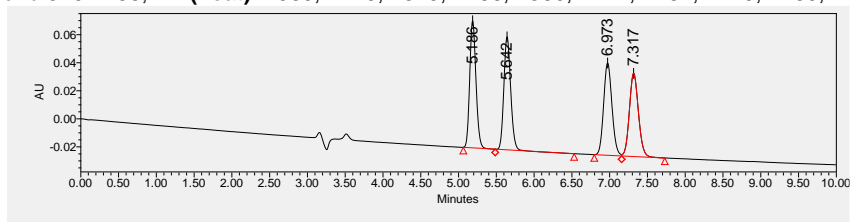

|   | Retention Time | Area   | % Area |
|---|----------------|--------|--------|
| 1 | 5.186          | 519417 | 25.62  |
| 2 | 5.642          | 509869 | 25.15  |



|   |       |        |       |
|---|-------|--------|-------|
| 3 | 6.973 | 504657 | 24.89 |
| 4 | 7.317 | 493617 | 24.35 |

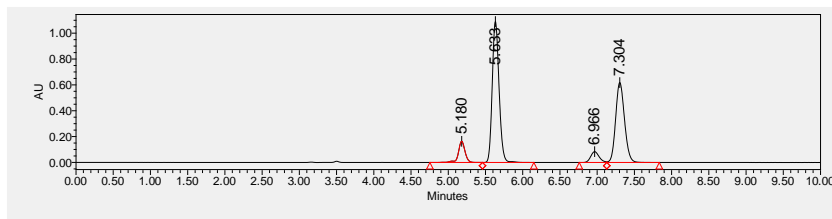

|   | Retention Time | Area    | % Area |
|---|----------------|---------|--------|
| 1 | 5.180          | 1012704 | 7.37   |
| 2 | 5.633          | 6934463 | 50.49  |
| 3 | 6.966          | 659977  | 4.81   |
| 4 | 7.304          | 5126702 | 37.33  |

### 6-phenyl-7,7a-dihydrobenzo[d]indeno[1',2':2,3]pyrrolo[2,1-b]thiazol-8(6H)-one (3ra)

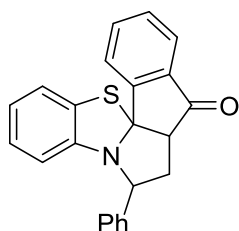

( $C_{23}H_{17}NOS$ ) Prepared according to the general procedure. 30.7 mg, 86% yield; yellow foam. Melting point: 50 – 56 °C.  $[\alpha]_D^{20} = +154.5$  (c 0.61,  $CH_2Cl_2$ ). 86:14 d.r. (determined by  $^1H$  NMR), 70% ee for the major isomer and 80% ee for the minor isomer. HPLC (Chiral **IB** column), *n*PrOH/*n*Hexane = 5/95, Flow rate: 1.0 mL/min, 227 nm,  $t_{major\ isomer} = 9.76$  min (major), 8.52 min (minor);  $t_{minor\ isomer} = 10.96$  min (major), 6.88 min (minor). Major isomer:  $^1H$  NMR (400 MHz,  $CDCl_3$ )  $\delta$  7.68 – 7.64 (m, 2H), 7.64 – 7.60 (m, 1H), 7.49 – 7.42 (m, 1H), 7.25 – 7.19 (m, 6H), 6.99 – 6.91 (m, 1H), 6.89 – 6.80 (m, 1H), 6.33 – 6.25 (m, 1H), 4.76 (dd,  $J = 6.8, 8.8$  Hz, 1H), 3.73 (dd,  $J = 7.6, 10.0$  Hz, 1H), 2.93 – 2.83 (m, 1H), 2.27 – 2.17 (m, 1H).  $^{13}C\{^1H\}$  NMR (100 MHz,  $CDCl_3$ )  $\delta$  203.5, 156.5, 147.6, 141.5, 136.7, 132.7, 132.1, 129.8, 128.7, 127.8, 127.2, 125.4, 125.4, 124.0, 123.2, 121.3, 116.1, 88.6, 74.0, 59.3, 38.3. HRMS (FTMS+c ESI) calcd for  $C_{23}H_{18}NOS^+$  ( $[M]+H^+$ ) = 356.1104, Found 356.1096; IR (neat): 3059, 1718, 1599, 1463, 1264, 733, 701  $cm^{-1}$

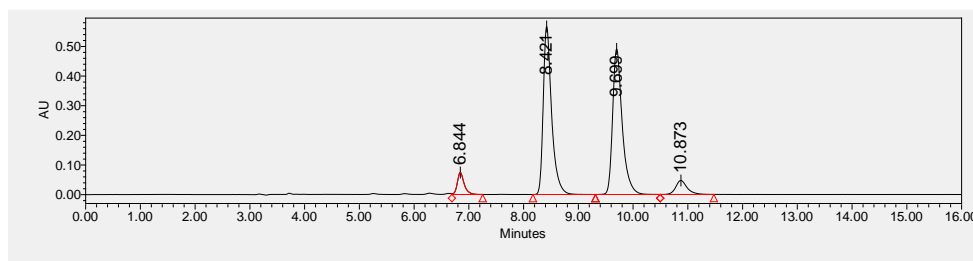

|   | Retention Time | Area    | % Area |
|---|----------------|---------|--------|
| 1 | 6.844          | 646158  | 4.83   |
| 2 | 8.421          | 6055085 | 45.23  |
| 3 | 9.699          | 5996084 | 44.79  |
| 4 | 10.873         | 691078  | 5.16   |

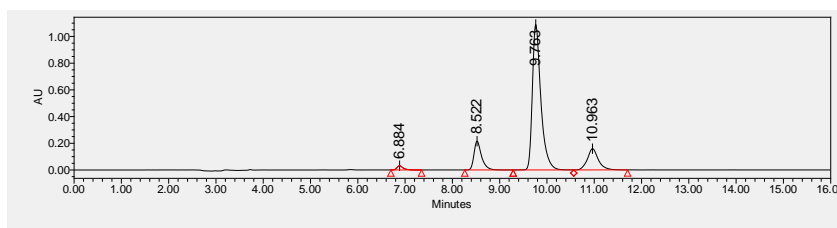

|   | Retention Time | Area     | % Area |
|---|----------------|----------|--------|
| 1 | 6.884          | 288471   | 1.53   |
| 2 | 8.522          | 2389299  | 12.69  |
| 3 | 9.763          | 13592745 | 72.18  |
| 4 | 10.963         | 2560749  | 13.60  |

### Methyl 3a-methyl-1-phenyl-1,2,3,3a-tetrahydrobenzo[d]pyrrolo[2,1-b]thiazole-3-carboxylate (3sa)

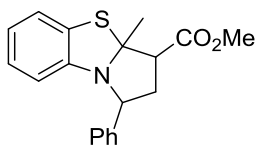

( $C_{19}H_{19}NO_2S$ ) Prepared according to the general procedure for 48 h. 26.9 mg, 83% yield; yellow oil.  $[\alpha]_D^{20} = +115.6$  (c 0.55,  $CH_2Cl_2$ ). 51:49 d.r. (determined by  $^1H$  NMR), 57% ee for the major isomer and 56% ee for the minor isomer. HPLC (Chiral **AD-H** column), *n*PrOH/*n*Hexane = 2/98, Flow rate: 1.0 mL/min, 227 nm,  $t_{major\ isomer} = 10.20$  min (major), 7.90 min (minor);  $t_{minor\ isomer} = 8.64$  min (major), 6.89 min (minor). Major isomer:  $^1H$  NMR (400 MHz,  $CDCl_3$ )  $\delta$  7.51 – 7.35 (m, 4H), 7.34 – 7.31 (m, 1H), 7.13 – 7.07 (m, 1H), 6.81 – 6.74 (m, 2H), 6.21 – 6.14 (m, 1H), 4.47 (dd,  $J = 6.4, 10.4$  Hz, 1H), 3.77 (s, 3H), 3.26 (t,  $J = 7.2$  Hz, 1H), 2.64 – 2.53 (m, 1H), 2.29 – 2.21 (m, 1H), 1.71 (s, 3H).  $^{13}C\{^1H\}$  NMR (100 MHz,  $CDCl_3$ )  $\delta$  172.2, 147.7, 144.0,

129.6, 129.0, 127.7, 126.4, 125.1, 121.9, 121.2, 112.5, 83.3, 70.6, 54.2, 52.1, 37.4, 29.8. **HRMS (FTMS+c ESI)** calcd for  $C_{20}H_{19}NO_2S^+$  ( $[M]+H^+$ ) = 326.1209, Found 326.1214; **IR (neat)**: 2978, 1736, 1493, 1265, 1202, 1027, 734, 701  $cm^{-1}$

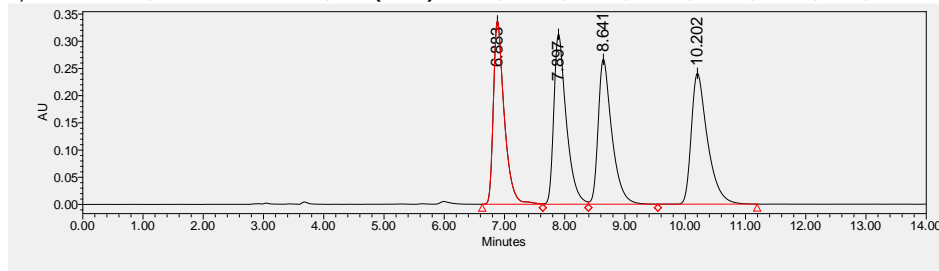

|   | Retention Time | Area    | % Area |
|---|----------------|---------|--------|
| 1 | 6.883          | 4203113 | 24.20  |
| 2 | 7.897          | 4483622 | 25.81  |
| 3 | 8.641          | 4191738 | 24.13  |
| 4 | 10.202         | 4490682 | 25.85  |

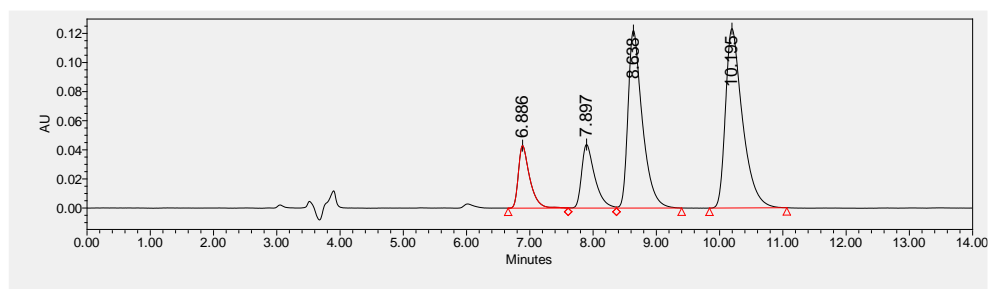

|   | Retention Time | Area    | % Area |
|---|----------------|---------|--------|
| 1 | 6.886          | 537875  | 9.99   |
| 2 | 7.897          | 629990  | 11.70  |
| 3 | 8.638          | 1915871 | 35.59  |
| 4 | 10.195         | 2299287 | 42.71  |

**Ethyl 1,3a-diphenyl-1,2,3,3a-tetrahydrobenzo[d]pyrrolo[2,1-b]thiazole-3-carboxylate (3ta)**

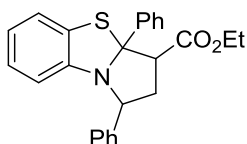

( $C_{25}H_{23}NO_2S$ ) Prepared according to the general procedure for 48 h. 27.3 mg, 68% yield; yellow oil.  $[\alpha]_D^{20} = +253.6$  (c 0.55,  $CH_2Cl_2$ ). 82:18 d.r. (determined by  $^1H$  NMR), 38% ee for the major isomer and 50% ee for the minor isomer. **HPLC** (Chiral **AD-H** column), *i*PrOH/*n*Hexane = 10/90, Flow rate: 1.0 mL/min, 227 nm,  $t_{major\ isomer} = 6.15$  min (major), 4.75 min (minor);  $t_{minor\ isomer} = 7.14$  min (major), 9.85 min (minor). Major isomer:  $^1H$  NMR (400 MHz,  $CDCl_3$ )  $\delta$  7.80 – 7.76 (m, 2H), 7.56 – 7.50 (m, 2H), 7.44 – 7.31 (m, 5H), 7.27 – 7.21 (m, 1H), 7.02 – 6.97 (m, 1H), 6.85 – 6.74 (m, 2H), 6.47 – 6.41 (m, 1H), 4.78 (dd,  $J = 6.8, 8.8$  Hz, 1H), 4.27 (q,  $J = 7.2$  Hz, 2H), 3.75 (dd,  $J = 3.6, 7.6$  Hz, 1H), 2.88 – 2.76 (m, 1H), 2.24 – 2.10 (m, 1H), 1.32 (t,  $J = 7.2$  Hz, 3H).  $^{13}C\{^1H\}$  NMR (100 MHz,  $CDCl_3$ )  $\delta$  172.0, 148.5, 148.2, 143.3, 132.1, 128.9, 128.5, 128.1, 127.8, 127.5, 127.4, 125.5, 124.9, 124.0, 121.4, 115.8, 90.7, 70.7, 61.4, 56.0, 38.6, 14.3. **HRMS (FTMS+c ESI)** calcd for  $C_{25}H_{23}NNaO_2S^+$  ( $[M]+Na^+$ ) = 424.1342, Found 424.1349; **IR (neat)**: 2927, 1733, 1462, 1255, 1180, 1027, 742, 698  $cm^{-1}$

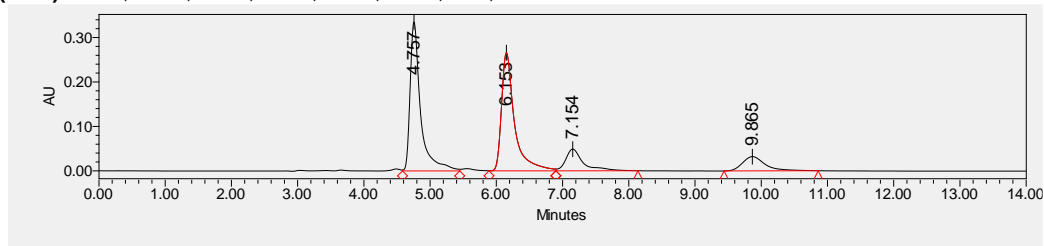

|   | Retention Time | Area    | % Area |
|---|----------------|---------|--------|
| 1 | 4.757          | 3695380 | 41.18  |
| 2 | 6.153          | 3620707 | 40.35  |
| 3 | 7.154          | 891947  | 9.94   |
| 4 | 9.865          | 765376  | 8.53   |

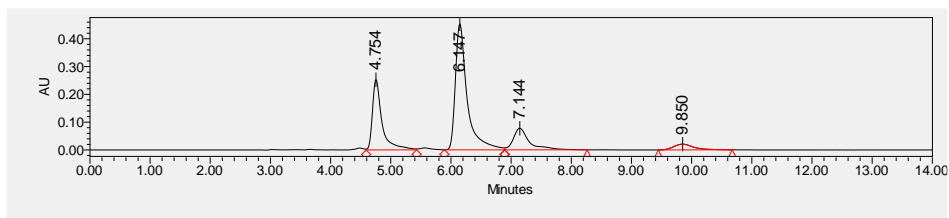

|   | Retention Time | Area    | % Area |
|---|----------------|---------|--------|
| 1 | 4.754          | 2807752 | 25.76  |
| 2 | 6.147          | 6177256 | 56.68  |
| 3 | 7.144          | 1436587 | 13.18  |
| 4 | 9.850          | 477009  | 4.38   |

**(7-Chloro-1,3a-diphenyl-1,2,3,3a-tetrahydrobenzo[d]pyrrolo[2,1-b]thiazol-3-yl)(phenyl)methanone (3ab)**

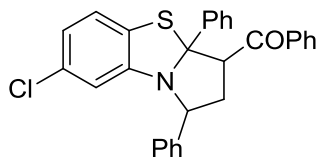

( $C_{29}H_{22}ClNOS$ ) Prepared according to the general procedure for 48 h. 40.0 mg, 85% yield; yellow foam. Melting point: 74 – 78 °C.  $[\alpha]_D^{20} = +446.1$  (c 0.77,  $CH_2Cl_2$ ). 85:15 d.r. (determined by  $^1H$  NMR), 92% ee for the major isomer and 91% ee for the minor isomer. **UPCC** (Chiral **OJ-3** column), EtOH/ $CO_2 = 10/90$ , Flow rate: 1.5 mL/min, 227 nm,  $t_{major\ isomer} = 11.50$  min (major), 10.53 min (minor);  $t_{minor\ isomer} = 9.74$  min (major), 9.29 min (minor). Major isomer:  $^1H$  NMR (400 MHz,  $CDCl_3$ )  $\delta$  7.89 – 7.84 (m, 2H), 7.79 – 7.73 (m, 2H), 7.60 – 7.54 (m, 3H), 7.48 – 7.42 (m, 4H), 7.39 – 7.29 (m, 3H), 7.27 – 7.21 (m, 1H), 6.94 – 6.90 (m, 1H), 6.84 – 6.78 (m, 1H), 6.66 – 6.61 (m, 1H), 4.84 (dd,  $J = 6.0, 8.4$  Hz, 1H), 4.70 (t,  $J = 7.2$  Hz, 1H), 2.99 – 2.89 (m, 1H), 2.42 – 2.27 (m, 1H).  $^{13}C\{^1H\}$  NMR (100 MHz,  $CDCl_3$ )  $\delta$  198.3, 149.9, 146.9, 143.7, 137.0, 133.7, 131.4, 130.3, 129.1, 129.0, 128.7, 128.6, 127.9, 127.8, 126.9, 125.7, 123.9, 122.1, 115.8, 91.5, 70.7, 55.6, 40.1. **HRMS (FTMS+c ESI)** calcd for  $C_{29}H_{23}^{35}ClNOS^+$  ( $[M]+H^+$ ) = 468.1183, Found 468.1188; calcd for  $C_{29}H_{23}^{37}ClNOS^+$  ( $[M]+H^+$ ) = 470.1154, Found 470.1165; **IR (neat)**: 3059, 1680, 1575, 1449, 1357, 1264, 1219, 1079, 739, 697  $cm^{-1}$

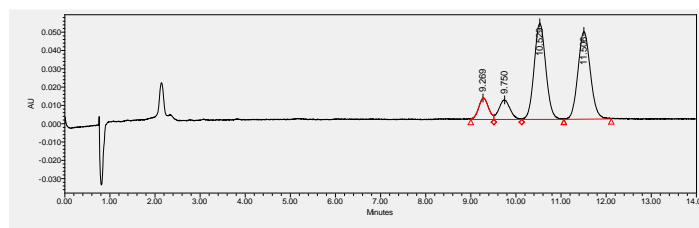

|   | Retention Time | Area   | % Area |
|---|----------------|--------|--------|
| 1 | 9.269          | 177304 | 7.99   |
| 2 | 9.750          | 182691 | 8.23   |
| 3 | 10.529         | 940894 | 42.41  |
| 4 | 11.506         | 917612 | 41.36  |

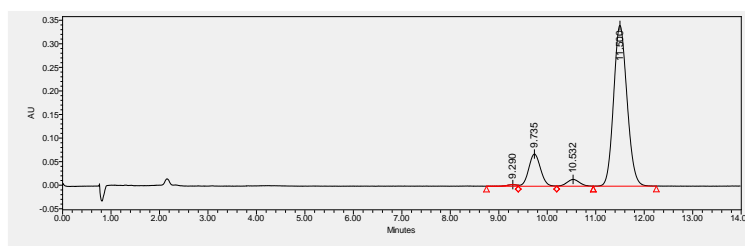

|   | Retention Time | Area    | % Area |
|---|----------------|---------|--------|
| 1 | 9.290          | 52294   | 0.65   |
| 2 | 9.735          | 1156337 | 14.39  |
| 3 | 10.532         | 261797  | 3.26   |
| 4 | 11.500         | 6564697 | 81.70  |

**[1-(3-Mercaptophenyl)-2,5-diphenyl-4,5-dihydro-1H-pyrrol-3-yl](phenyl)methanone (3ac)**

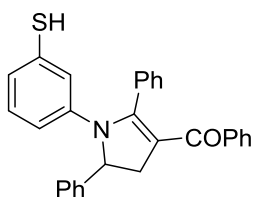

( $C_{29}H_{23}NOS$ ) Prepared according to the general procedure for 24 h. 17.5 mg, 40% yield; yellow oil.  $[\alpha]_D^{20} = +185.8$  (c 0.10,  $CH_2Cl_2$ ). 94% ee. **HPLC** (Chiral **IG** column), *i*PrOH/*n*Hexane = 20/80, Flow rate: 1.0 mL/min, 230 nm,  $t_{major} = 22.80$  min,  $t_{minor} = 15.52$  min.  $^1H$  NMR (400 MHz,  $CDCl_3$ )  $\delta$  7.52 – 7.46 (m, 2H), 7.46 – 7.39 (m, 2H), 7.37 – 7.30 (m, 1H), 7.27 – 7.22 (m, 2H), 7.11 – 7.02 (m, 4H), 7.00 – 6.92 (m, 4H), 6.84 – 6.77 (m, 1H), 6.77 – 6.71 (m, 1H), 6.50 – 6.44 (m, 1H), 6.40 – 6.28 (m, 1H), 5.19 (dd,  $J = 4.8, 11.2$  Hz, 1H), 3.95 (dd,  $J = 11.2, 15.2$  Hz, 1H), 3.13 (s, 1H), 3.08 (dd,  $J = 4.8, 15.2$  Hz, 1H).  $^{13}C\{^1H\}$  NMR (100 MHz,  $CDCl_3$ )  $\delta$  193.5, 157.6, 143.3, 143.1, 140.5, 131.2, 131.2, 130.2, 129.9, 129.3, 129.3, 129.0, 128.6, 128.0, 128.0, 127.3, 126.1, 124.7, 123.8, 120.6, 114.2, 68.9, 41.9. **HRMS (FTMS+c ESI)** calcd for  $C_{29}H_{24}NOS^+$  ( $[M]+H^+$ ) = 434.1573, Found 434.1578; **IR (neat)**: 3056, 2925, 2852, 1581, 1555, 1477, 1373, 1264, 736, 699  $cm^{-1}$

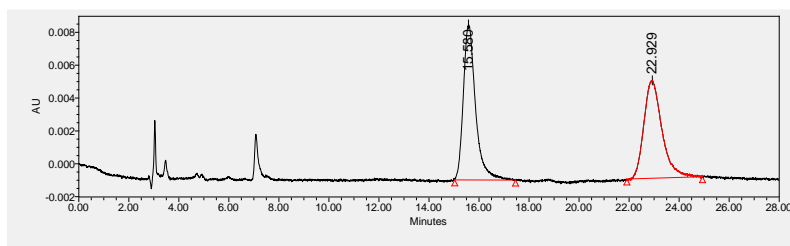

|   | Retention Time | Area   | % Area |
|---|----------------|--------|--------|
| 1 | 15.580         | 320385 | 51.72  |
| 2 | 22.929         | 299047 | 48.28  |

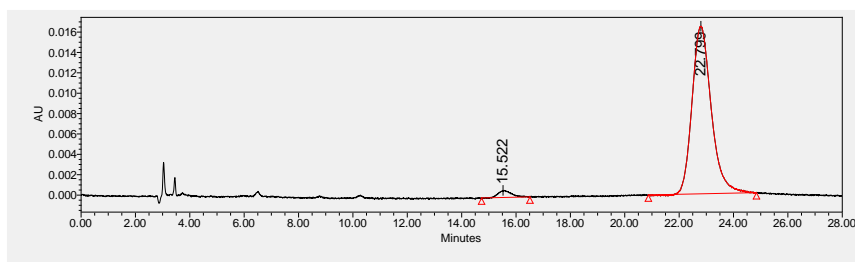

|   | Retention Time | Area   | % Area |
|---|----------------|--------|--------|
| 1 | 15.522         | 23598  | 2.83   |
| 2 | 22.799         | 809265 | 97.17  |

**(R)-[1-(2-hydroxyphenyl)-2,5-diphenyl-4,5-dihydro-1H-pyrrol-3-yl](phenyl)methanone (3ad)**

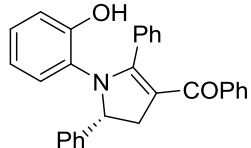

( $C_{29}H_{23}NO_2$ ) Prepared according to the general procedure for 96 h. 9.9 mg, 24% yield; yellow oil.  $[\alpha]_D^{20} = -156.6$  (c 0.20, MeOH). 71% ee. HPLC (Chiral IA column), *n*PrOH/*n*Hexane = 20/80, Flow rate: 1.0 mL/min, 227 nm, *t* = 6.83 min (major), 6.01 min (minor);  $^1H$  NMR (400 MHz,  $d_6$ -DMSO)  $\delta$  9.71 (s, 1H), 7.50 – 7.45 (m, 2H), 7.37 – 7.30 (m, 2H), 7.27 – 7.20 (m, 1H), 7.12 – 7.07 (m, 2H), 7.06 – 7.01 (m, 1H), 6.97 – 6.89 (m, 5H), 6.86 – 6.75 (m, 3H), 6.65 – 6.50 (m, 2H), 6.42 – 6.30 (m, 1H), 3.35 (dd, *J* = 9.2, 11.6 Hz, 1H), 3.86 (dd, *J* = 12.0, 15.2 Hz, 1H), 3.00 (dd, *J* = 9.2, 15.2 Hz, 1H).  $^{13}C\{^1H\}$  NMR (100 MHz,  $d_6$ -

DMSO)  $\delta$ 190.27, 153.63, 141.31, 131.18, 129.59, 128.56, 128.46, 128.19, 127.95, 127.55, 127.51, 127.45, 127.15, 126.85, 126.73, 118.29, 115.84, 79.14, 67.15, 40.65. HRMS (FTMS+c ESI) calcd for  $C_{29}H_{24}NO_2^+$  ( $[M]+H^+$ ) = 418.1802, Found 418.1810; IR (neat): 3394, 1659, 1265, 1024, 1005, 1029, 822, 759, 729  $cm^{-1}$

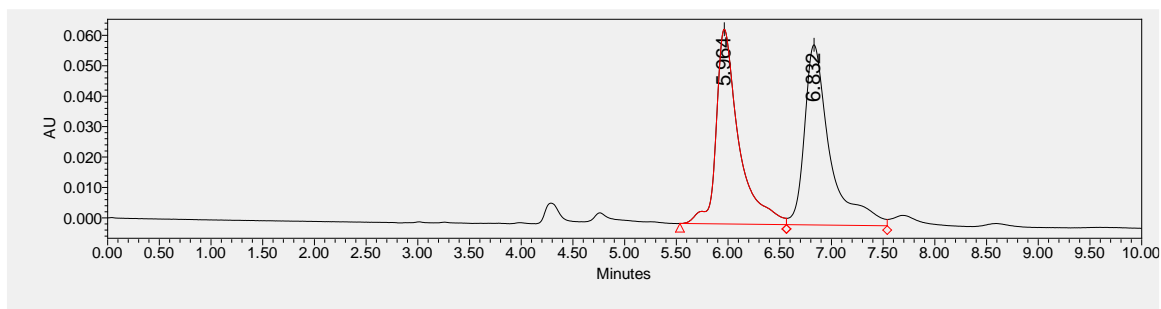

|   | Retention Time | Area    | % Area |
|---|----------------|---------|--------|
| 1 | 5.964          | 975666  | 49.02  |
| 2 | 6.832          | 1014731 | 50.98  |

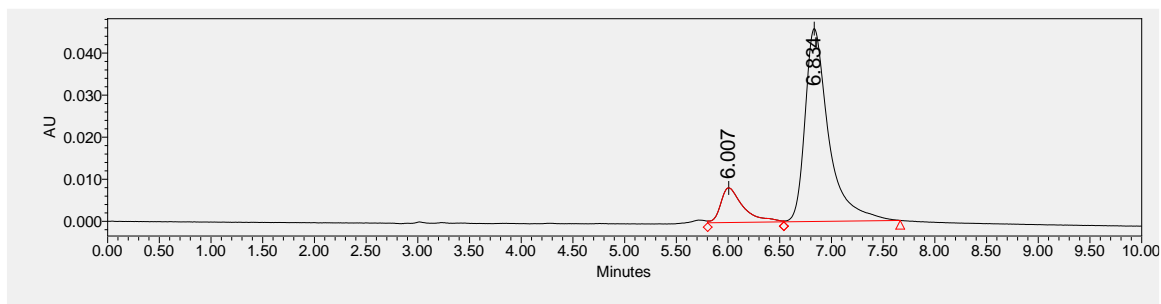

|   | Retention Time | Area | % Area |
|---|----------------|------|--------|
| 1 | 6.007          |      |        |
| 2 | 6.834          |      |        |

|   |       |        |       |
|---|-------|--------|-------|
| 1 | 6.007 | 125008 | 14.64 |
| 2 | 6.834 | 728667 | 85.36 |

**{1-(3-Methoxyphenyl)-3a-phenyl-1,2,3,3a-tetrahydrobenzo[d]pyrrolo[2,1-b]thiazol-3-yl}(phenyl)methanol (4)**

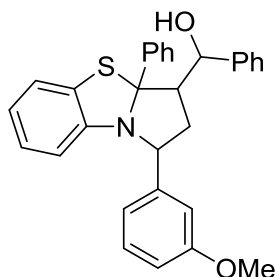

( $C_{30}H_{27}NO_2S$ ) 99% yield; yellow oil.  $[\alpha]^{20}_D = +455.0$  (c 0.40,  $CH_2Cl_2$ ). HPLC (Chiral ID column),  $iPrOH/nHexane = 20/80$ , Flow rate: 1.0 mL/min, 230 nm, tr (minor) = 7.41 min, tr (major) = 8.87 min;  $^1H$  NMR (400 MHz,  $CDCl_3$ )  $\delta$  7.94 – 7.86 (m, 2H), 7.42 – 7.31 (m, 6H), 7.31 – 7.26 (m, 1H), 7.26 – 7.20 (m, 2H), 7.12 – 7.07 (m, 1H), 7.03 – 6.96 (m, 2H), 6.90 – 6.78 (m, 3H), 6.50 – 6.42 (m, 1H), 5.04 (dd,  $J = 3.6, 9.2$  Hz, 1H), 4.44 (t,  $J = 7.6$  Hz, 1H), 3.75 (s, 3H), 3.24 – 3.11 (m, 1H), 2.71 (d,  $J = 3.2$  Hz, 1H), 1.92 – 1.82 (m, 2H).  $^{13}C\{^1H\}$  NMR (100 MHz,  $CDCl_3$ )  $\delta$  160.0, 149.7, 147.9, 145.0, 142.7, 131.8, 129.8, 128.8, 128.4, 128.4, 127.2, 127.2, 126.1, 125.0, 123.8, 121.6, 119.7, 115.7, 113.1, 112.9, 93.5, 69.4, 77.2, 56.8, 55.3, 39.7. HRMS (FTMS+c ESI) calcd for  $C_{30}H_{28}NO_2S^+$  ( $[M]+H^+$ ) = 466.1835, Found 466.1825; IR (neat): 3551, 3466, 3058, 2936, 1601, 1488, 1462, 1262, 1158, 1129, 1037, 893, 748,  $700\text{ cm}^{-1}$ .

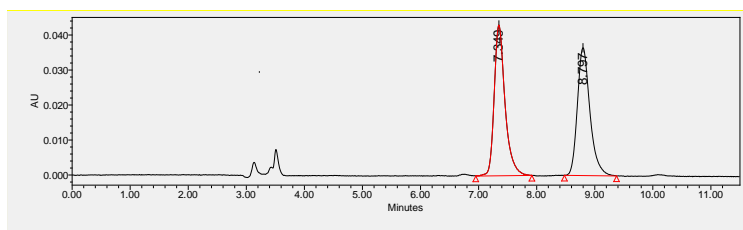

|   | Retention Time | Area   | % Area |
|---|----------------|--------|--------|
| 1 | 7.349          | 557022 | 50.36  |
| 2 | 8.797          | 548981 | 49.64  |

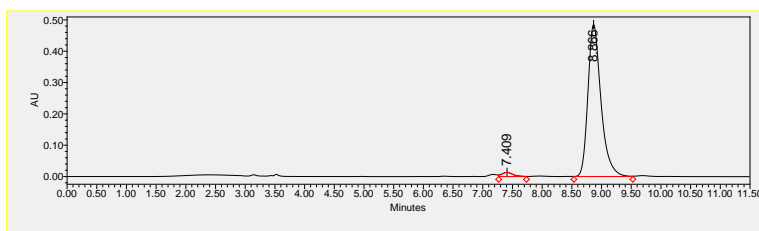

|   | Retention Time | Area    | % Area |
|---|----------------|---------|--------|
| 1 | 7.409          | 171807  | 2.27   |
| 2 | 8.866          | 7409782 | 97.73  |

**{1-(3-Methoxyphenyl)-4-oxido-3a-phenyl-1,2,3,3a-tetrahydrobenzo[d]pyrrolo[2,1-b]thiazol-3-yl}(phenyl)methanone (5)**

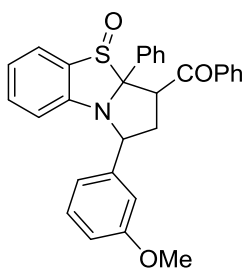

( $C_{30}H_{25}NO_2S$ ) 63% yield; yellow oil.  $[\alpha]^{20}_D = +883.7$  (c 0.10,  $CH_2Cl_2$ ). HPLC (Chiral IA column),  $iPrOH/nHexane = 20/80$ , Flow rate: 1.0 mL/min, 220 nm, tr (minor) = 14.07 min, tr (major) = 12.43 min;  $^1H$  NMR (400 MHz,  $CDCl_3$ )  $\delta$  8.24 – 8.17 (m, 2H), 7.74 – 7.69 (m, 1H), 7.68 – 7.64 (m, 1H), 7.61 – 7.55 (m, 2H), 7.46 – 7.39 (m, 1H), 7.37 – 7.32 (m, 2H), 7.32 – 7.27 (m, 1H), 7.24 – 7.20 (m, 2H), 7.19 – 7.16 (m, 1H), 7.15 – 7.10 (m, 2H), 7.05 – 7.00 (m, 1H), 7.00 – 6.95 (m, 1H), 6.62 – 6.56 (m, 1H), 5.24 (dd,  $J = 6.4, 12.0$  Hz, 1H), 4.67 (dd,  $J = 5.2, 11.6$  Hz, 1H), 3.89 (s, 3H), 3.26 – 3.12 (m, 1H), 2.71 – 2.61 (m, 1H).  $^{13}C\{^1H\}$  NMR (100 MHz,  $CDCl_3$ )  $\delta$  196.7, 160.1, 143.2, 137.9, 135.3, 134.8, 133.9, 133.7, 133.6, 130.1, 129.2, 129.0, 128.9, 128.6, 128.3, 128.0, 124.1, 120.1, 118.2, 113.6, 113.5, 101.0, 69.5, 55.3, 46.1, 41.9. HRMS (FTMS+c ESI) calcd for  $C_{30}H_{26}NO_2S^+$  ( $[M]+H^+$ ) = 480.1628, Found 480.1624; IR (neat): 3061, 3466, 3058, 2936, 1601, 1590, 1463, 1262, 1158, 1129, 1040, 755,  $700\text{ cm}^{-1}$ .

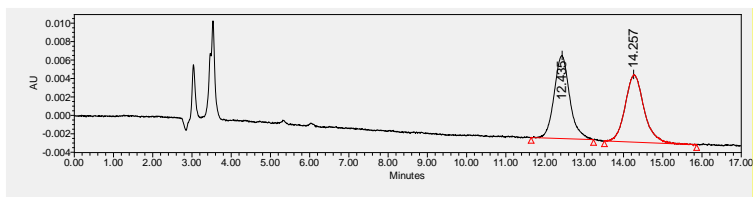

|   | Retention Time | Area   | % Area |
|---|----------------|--------|--------|
| 1 | 12.435         | 247055 | 50.28  |
| 2 | 14.257         | 244316 | 49.72  |

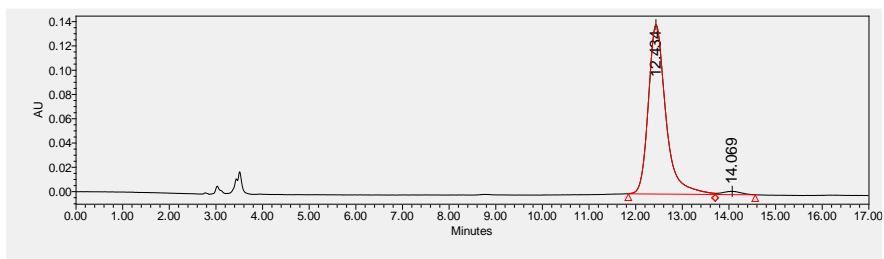

|   | Retention Time | Area    | % Area |
|---|----------------|---------|--------|
| 1 | 12.434         | 3634274 | 97.93  |
| 2 | 14.069         | 76644   | 2.07   |

## (L) Copies of NMR Spectra.

Compound **3aa**:

$^1\text{H}$  NMR (400 MHz,  $\text{CDCl}_3$ )

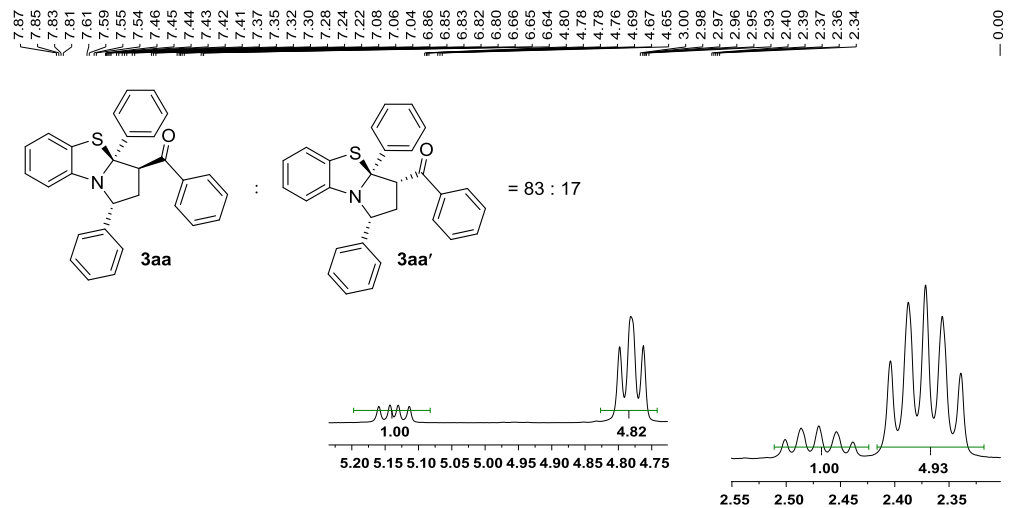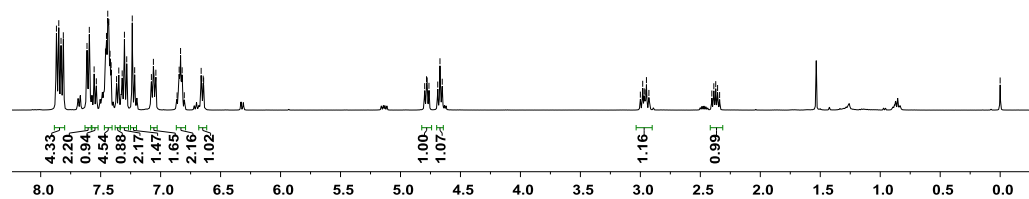

$^{13}\text{C}$  NMR (100 MHz,  $\text{CDCl}_3$ )

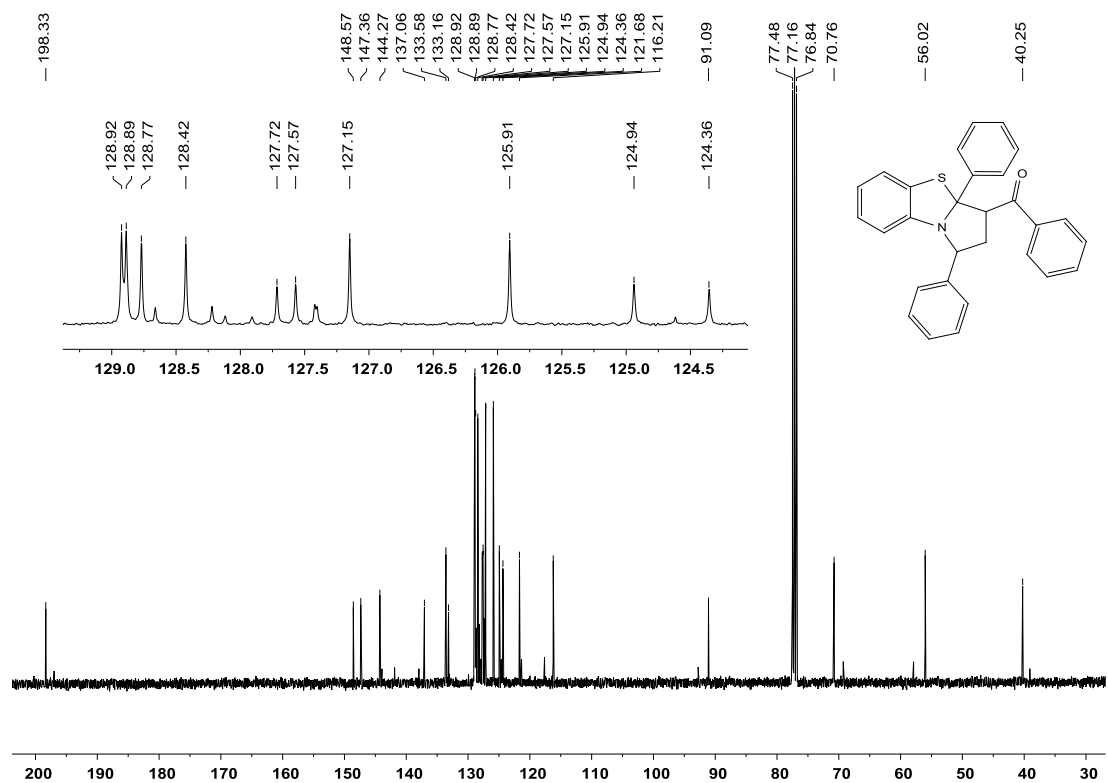

Compound **3ba**:

$^1\text{H}$  NMR (400 MHz,  $\text{CDCl}_3$ )

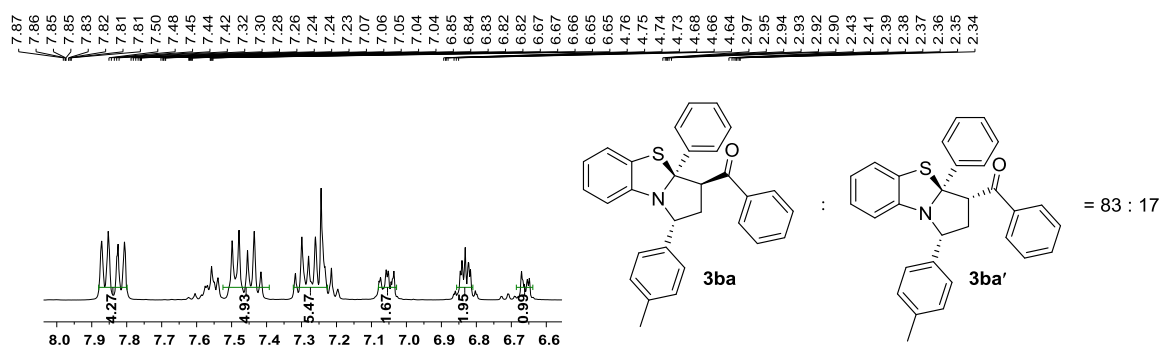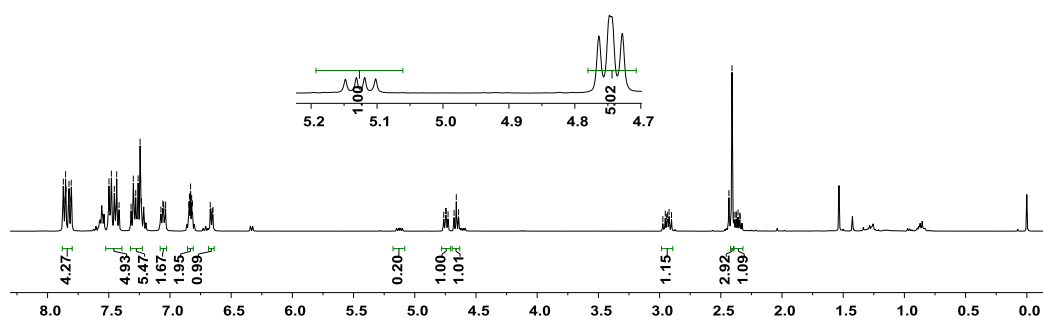

$^{13}\text{C}\{^1\text{H}\}$  NMR (100 MHz,  $\text{CDCl}_3$ )

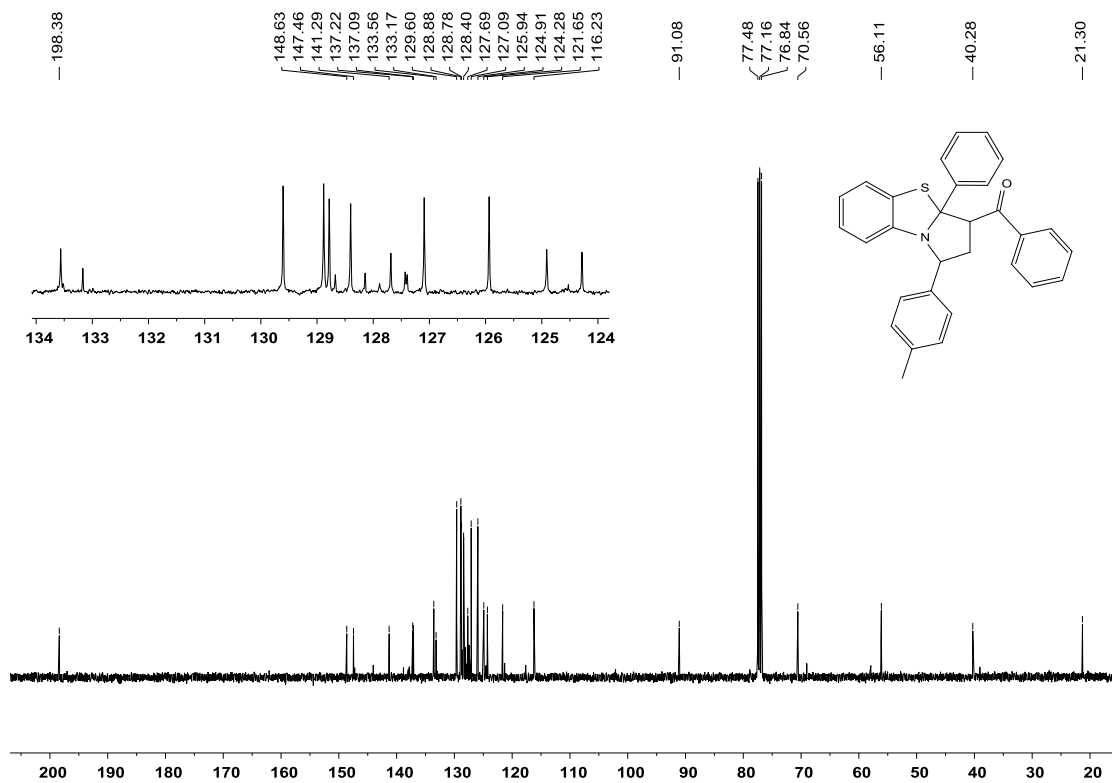



Compound **3ca**:

<sup>1</sup>H NMR (400 MHz, CDCl<sub>3</sub>)

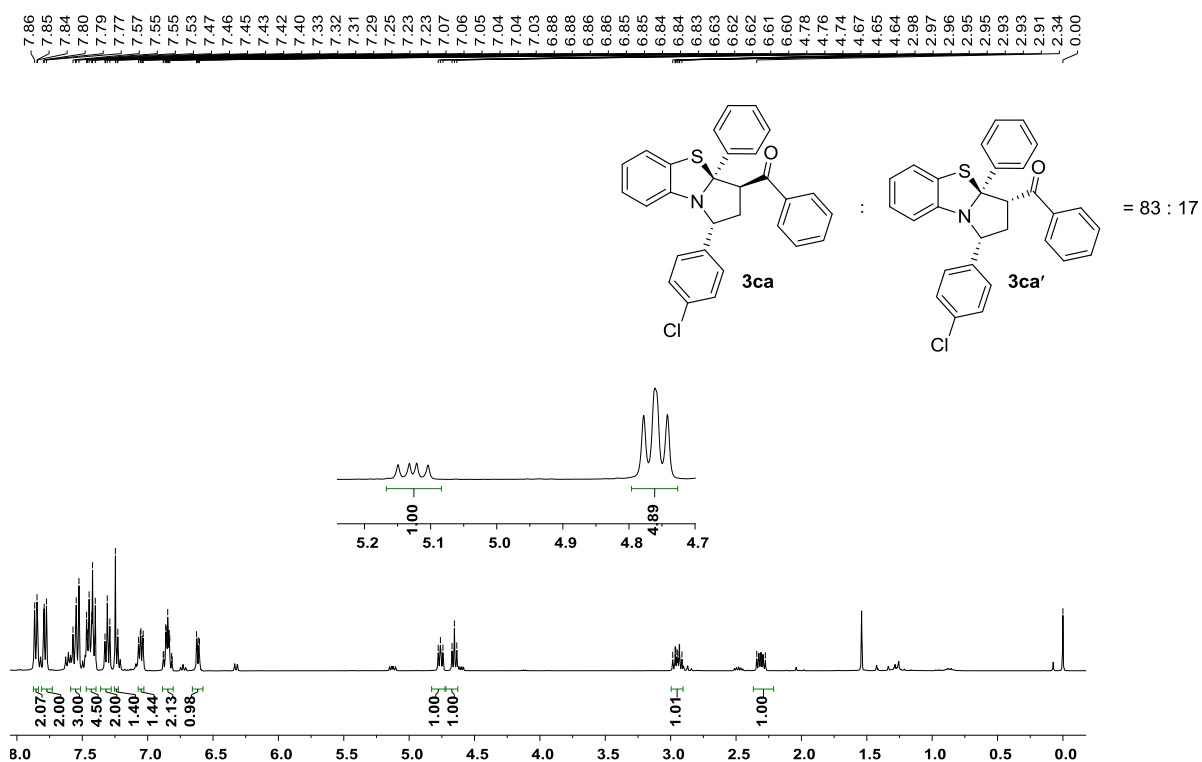

<sup>13</sup>C{<sup>1</sup>H} NMR (100 MHz, CDCl<sub>3</sub>)

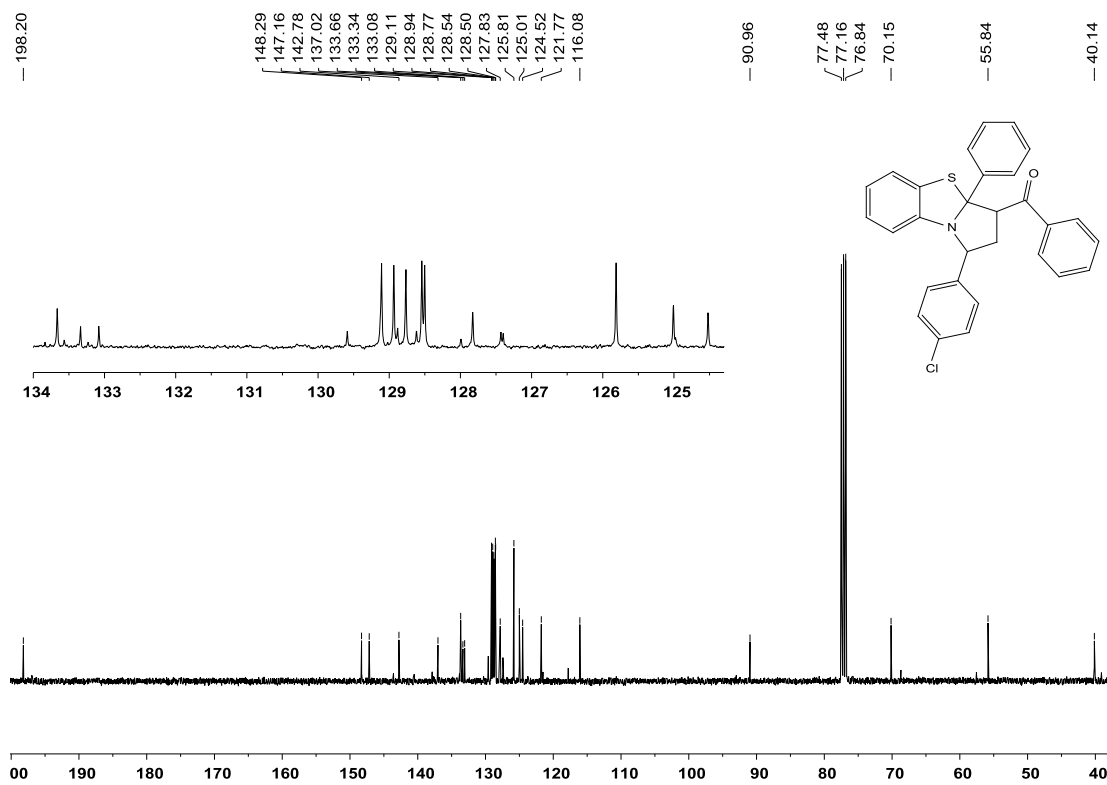

Compound **3da**:

$^1\text{H}$  NMR (400 MHz,  $\text{CDCl}_3$ )

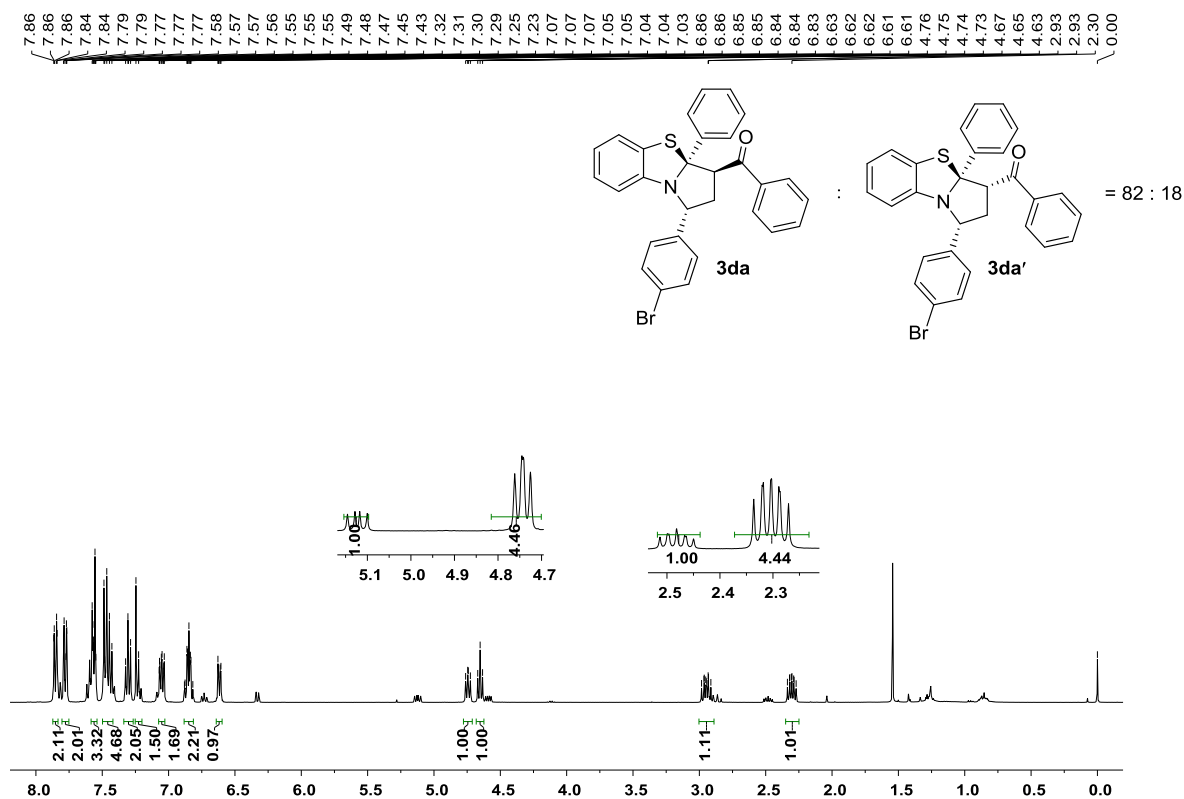

$^{13}\text{C}\{^1\text{H}\}$  NMR (100 MHz,  $\text{CDCl}_3$ )

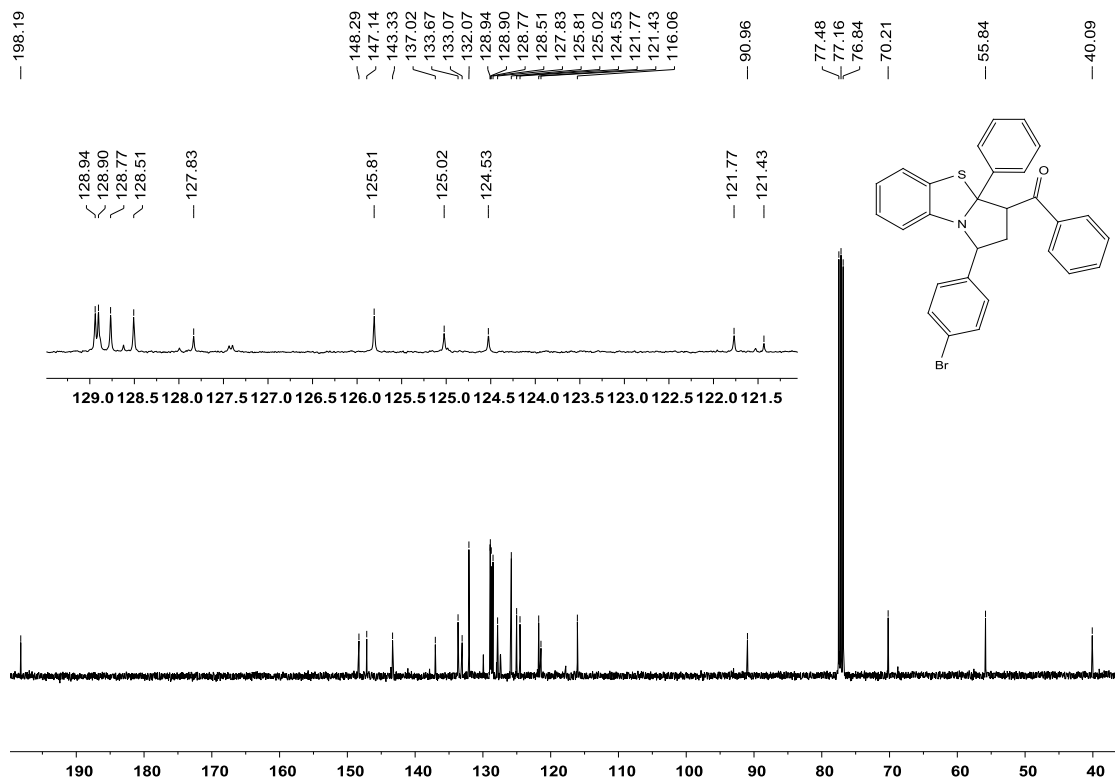

Compound **3ea**:

<sup>1</sup>H NMR (400 MHz, CDCl<sub>3</sub>)

7.87, 7.85, 7.85, 7.84, 7.83, 7.82, 7.81, 7.56, 7.54, 7.51, 7.49, 7.45, 7.45, 7.43, 7.36, 7.36, 7.35, 7.33, 7.32, 7.31, 7.31, 7.30, 7.29, 7.24, 7.24, 7.23, 7.22, 7.17, 7.15, 7.06, 7.04, 6.85, 6.84, 6.84, 6.83, 6.82, 6.68, 6.67, 6.67, 6.66, 6.66, 4.77, 4.75, 4.75, 4.73, 4.69, 4.67, 4.65, 2.96, 2.95, 2.94, 2.93, 2.41, 2.39, 2.37, 2.36, 0.00

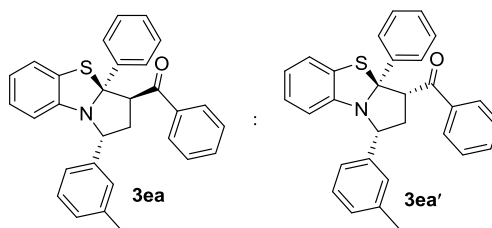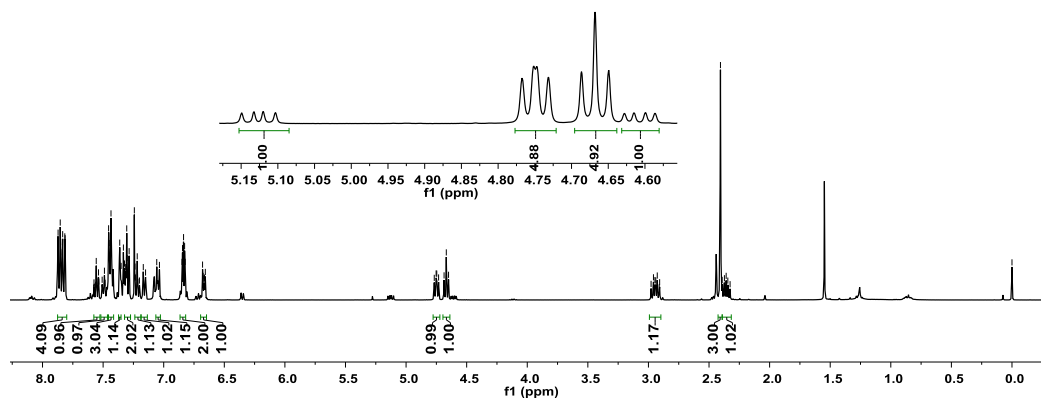

<sup>13</sup>C{<sup>1</sup>H} NMR (100 MHz, CDCl<sub>3</sub>)

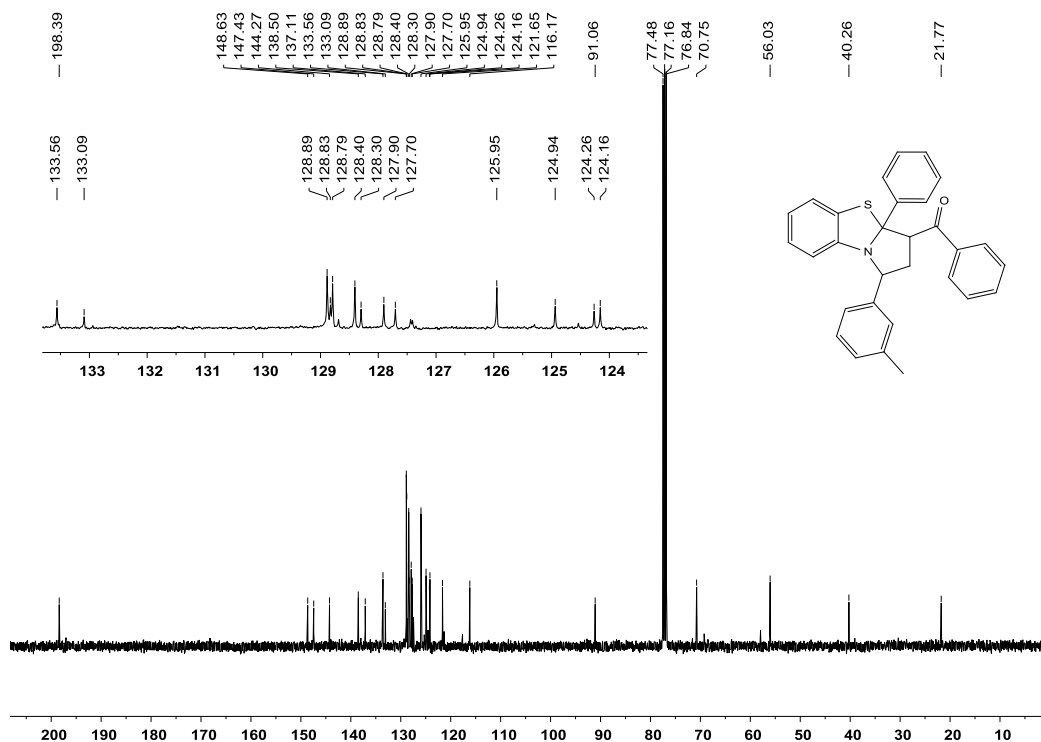

Compound 3fa:

<sup>1</sup>H NMR (400 MHz, CDCl<sub>3</sub>)

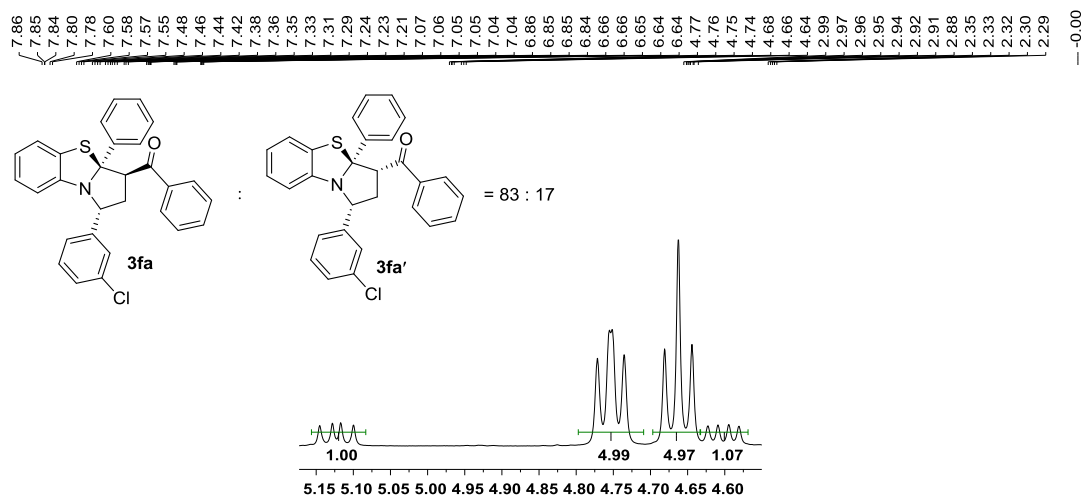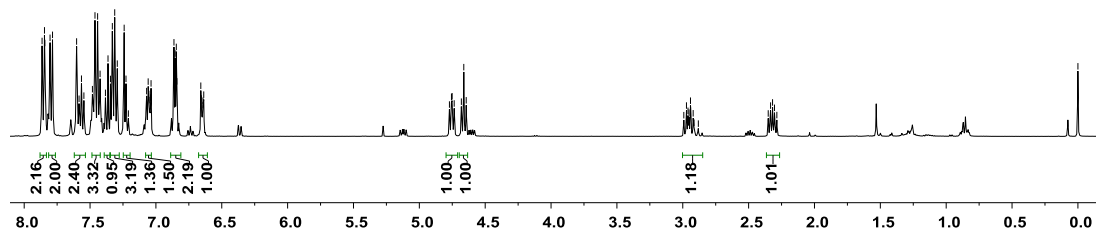

<sup>13</sup>C{<sup>1</sup>H} NMR (100 MHz, CDCl<sub>3</sub>)

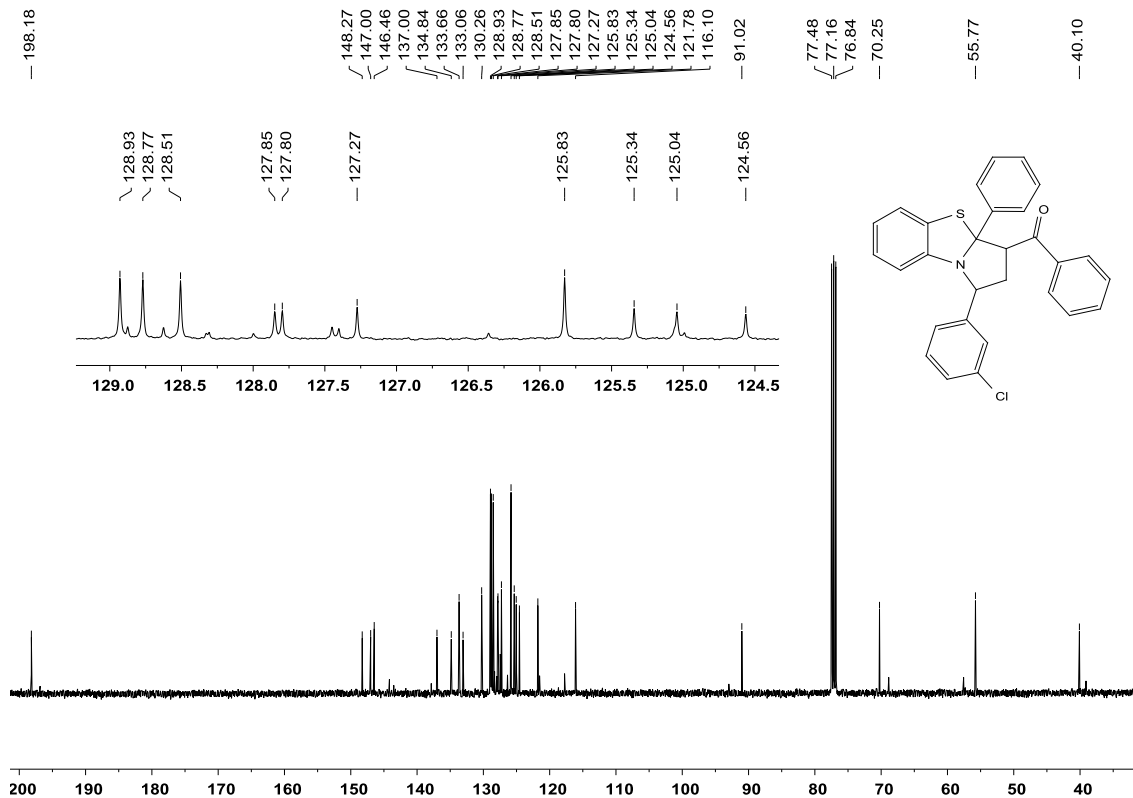

Compound **3ga**:

<sup>1</sup>H NMR (400 MHz, CDCl<sub>3</sub>)

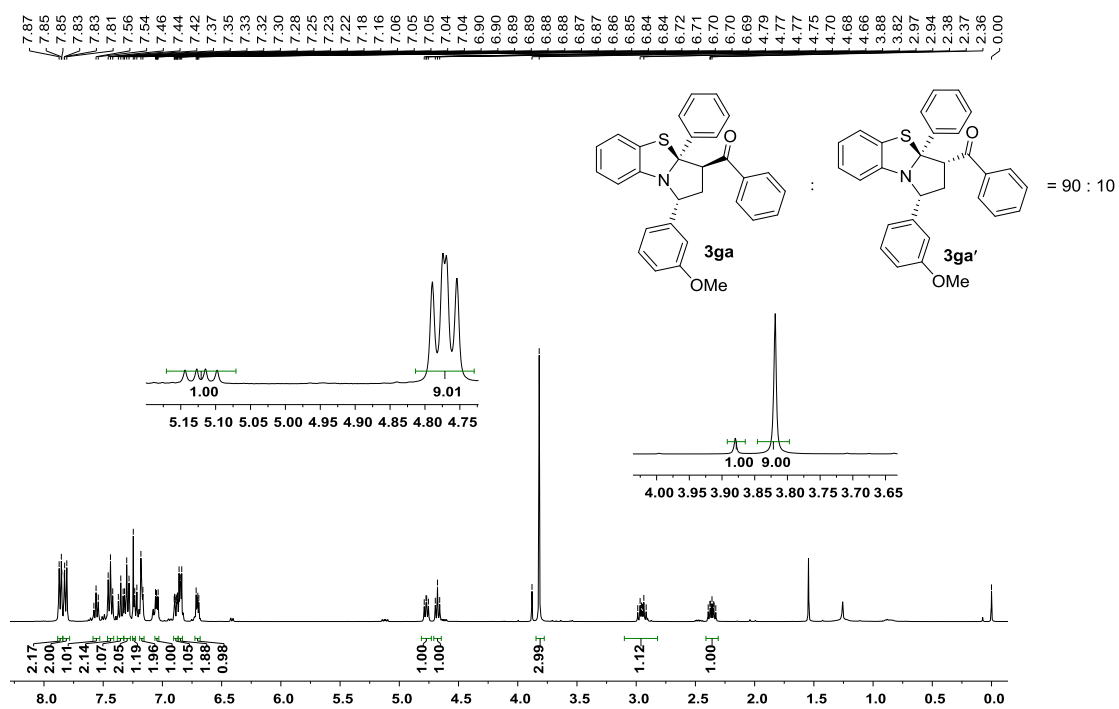

<sup>13</sup>C{<sup>1</sup>H} NMR (100 MHz, CDCl<sub>3</sub>)

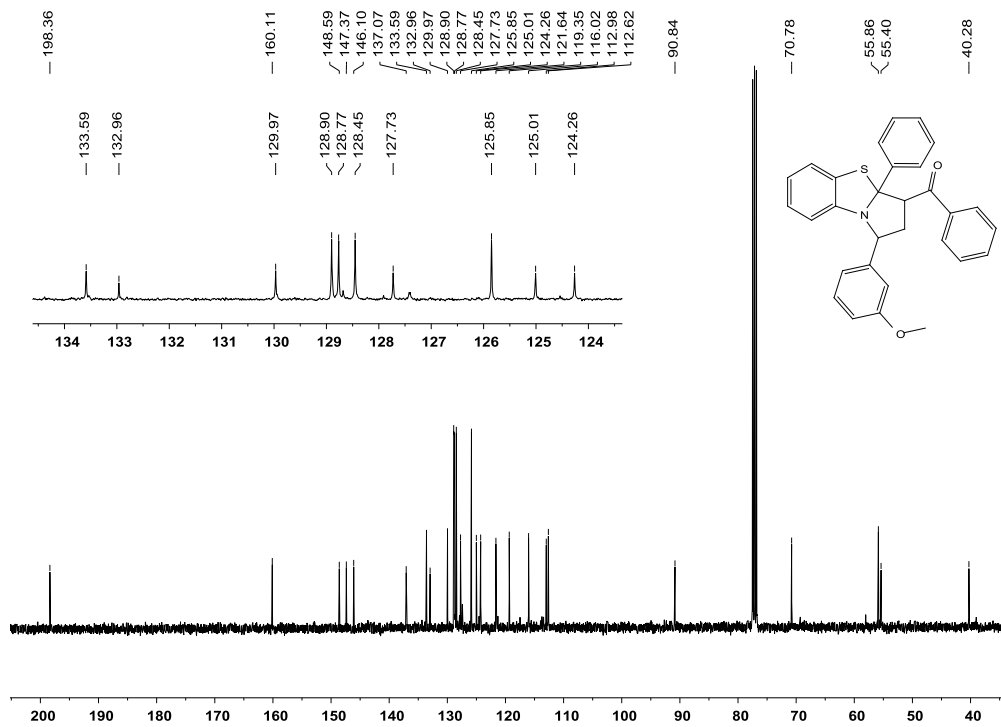

Compound **3ha**:

<sup>1</sup>H NMR (400 MHz, CDCl<sub>3</sub>)

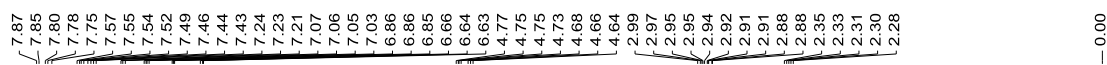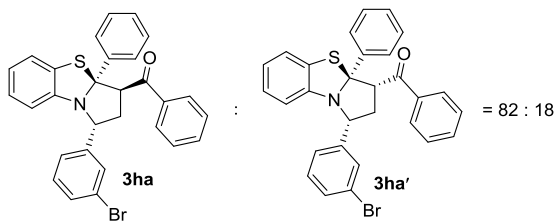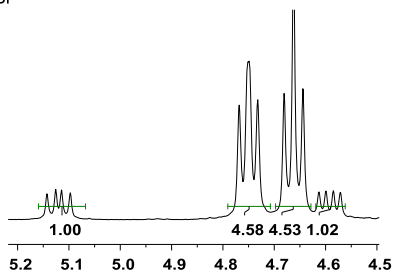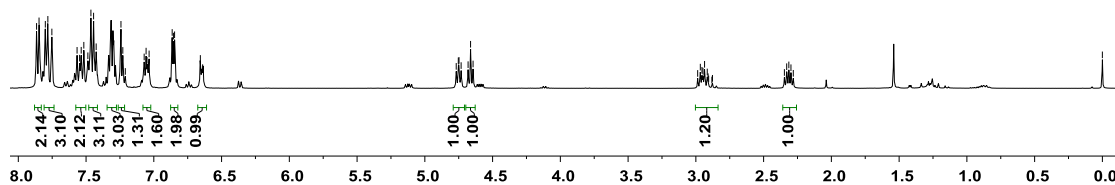

<sup>13</sup>C{<sup>1</sup>H} NMR (100 MHz, CDCl<sub>3</sub>)

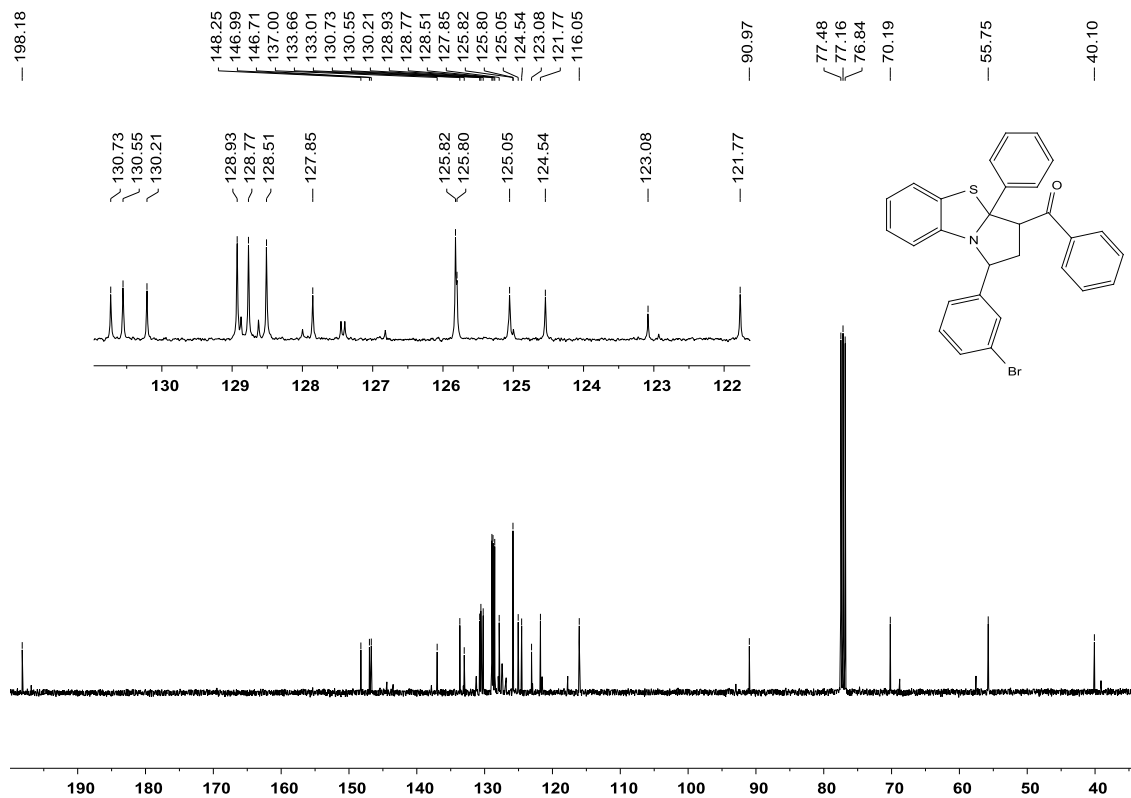

Compound **3ia**:

<sup>1</sup>H NMR (400 MHz, CDCl<sub>3</sub>)

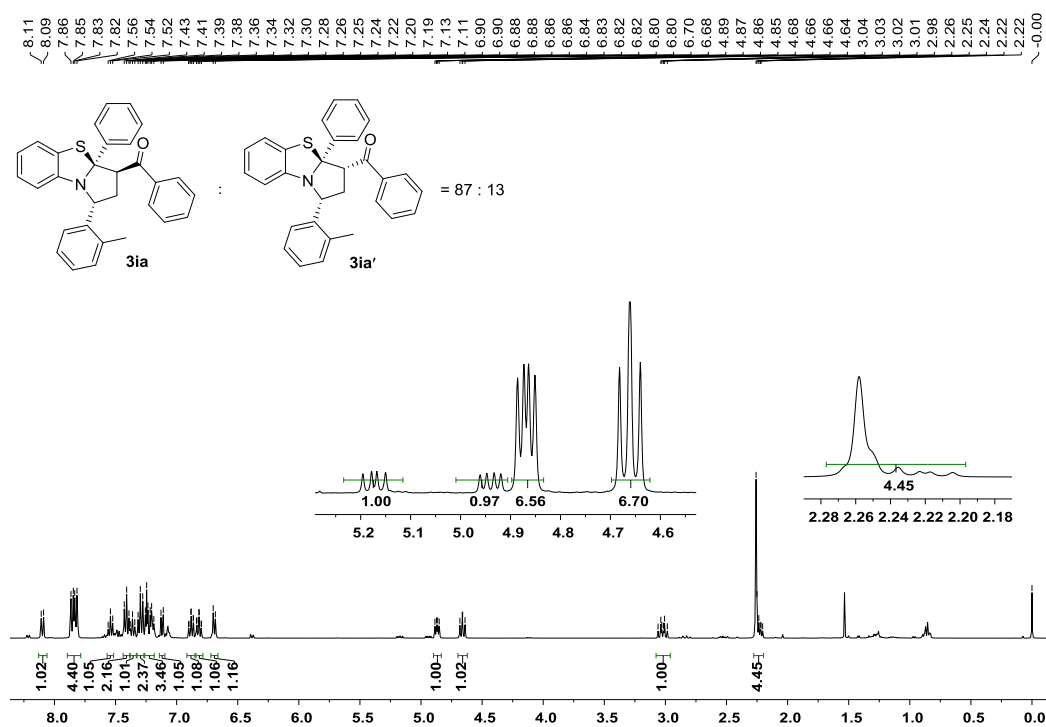

<sup>13</sup>C{<sup>1</sup>H} NMR (100 MHz, CDCl<sub>3</sub>)

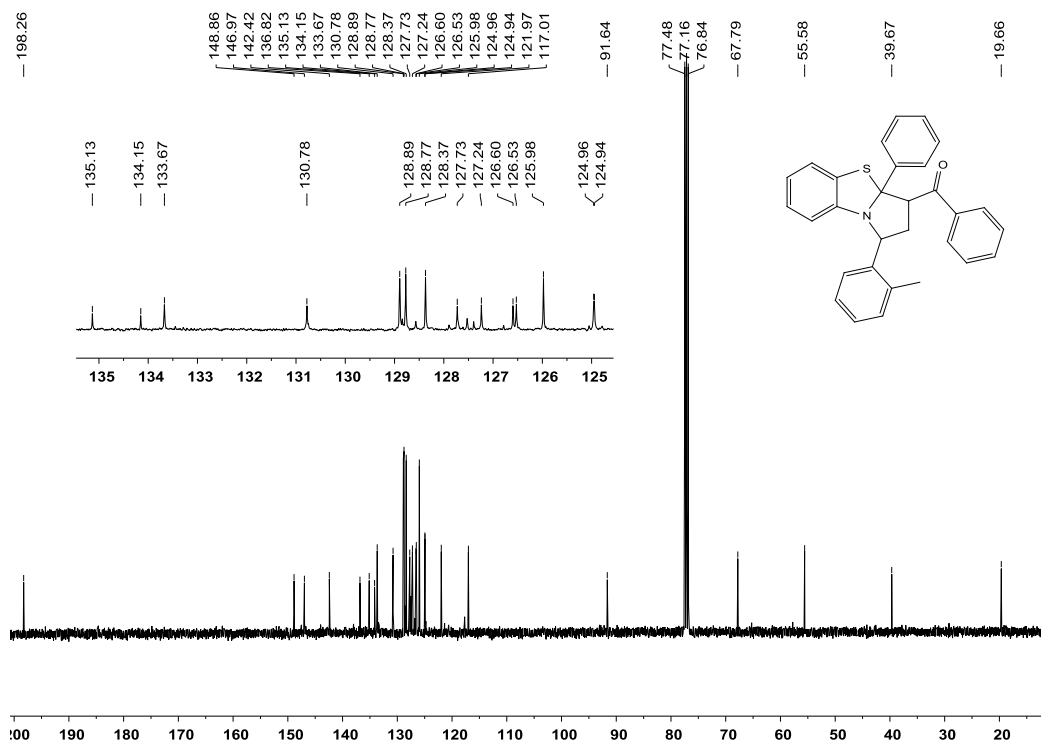

Compound **3ja**:

<sup>1</sup>H NMR (400 MHz, CDCl<sub>3</sub>)

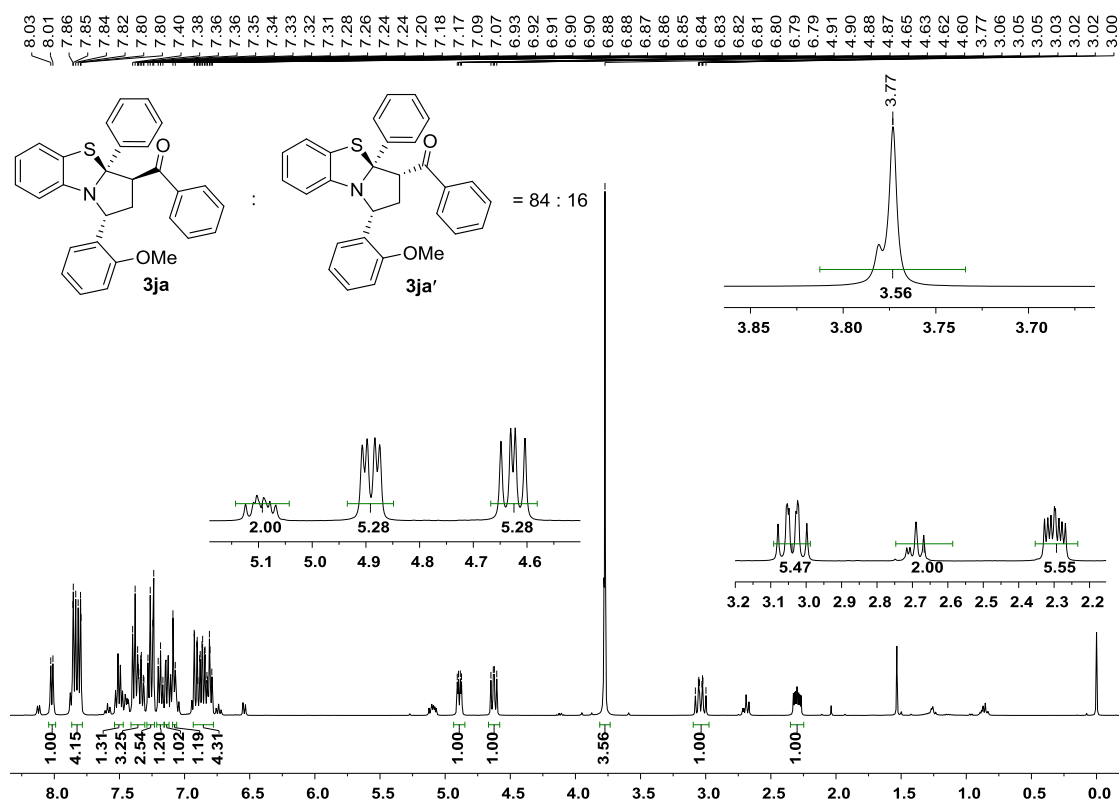

<sup>13</sup>C{<sup>1</sup>H} NMR (100 MHz, CDCl<sub>3</sub>)

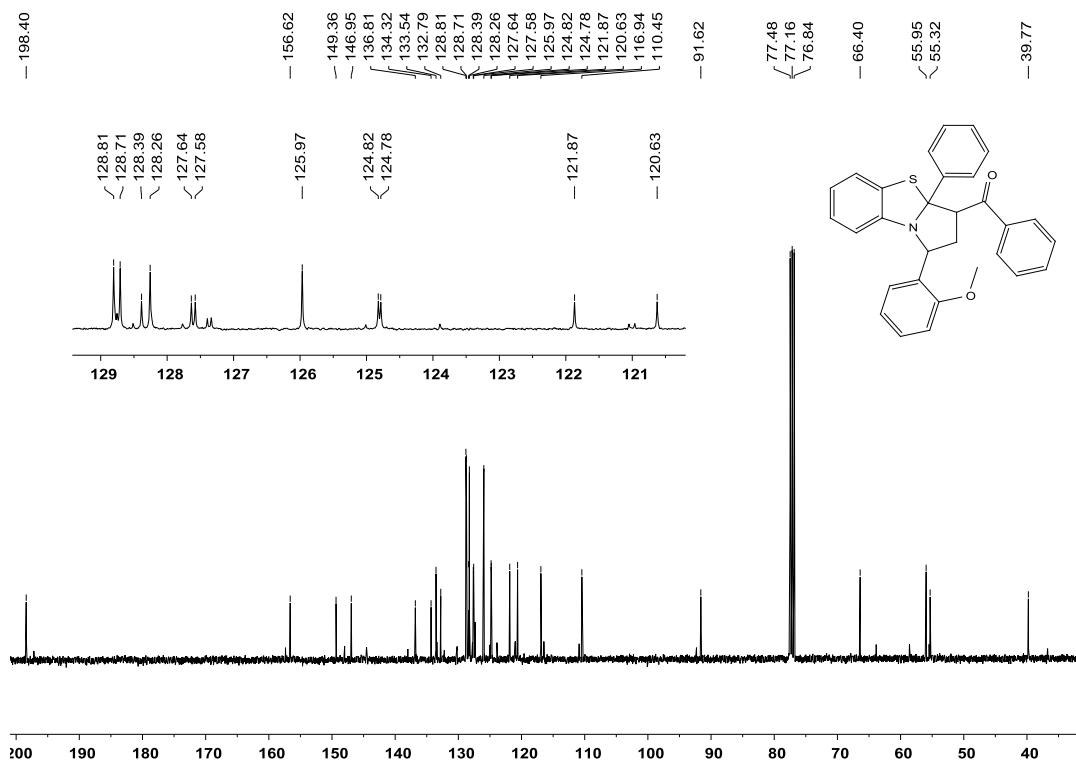



Compound **3ka**:

$^1\text{H}$  NMR (400 MHz,  $\text{CDCl}_3$ )

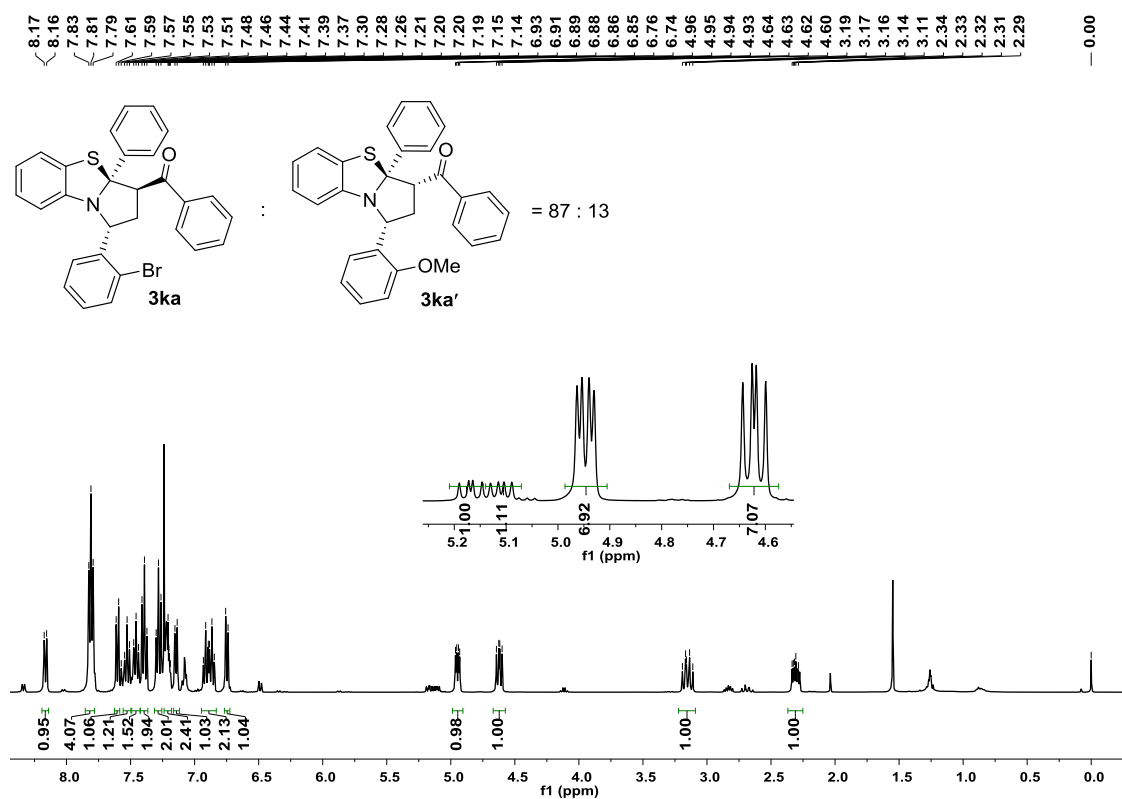

$^{13}\text{C}\{^1\text{H}\}$  NMR (100 MHz,  $\text{CDCl}_3$ )

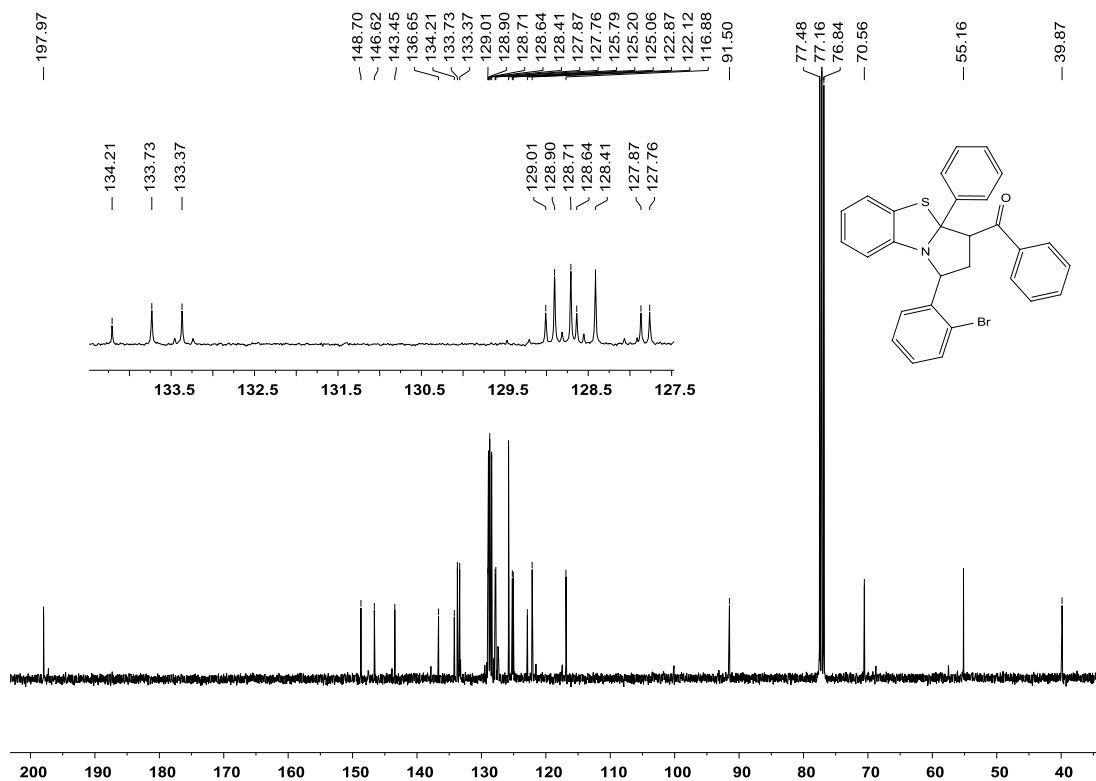

Compound **3la**:

<sup>1</sup>H NMR (400 MHz, CDCl<sub>3</sub>)

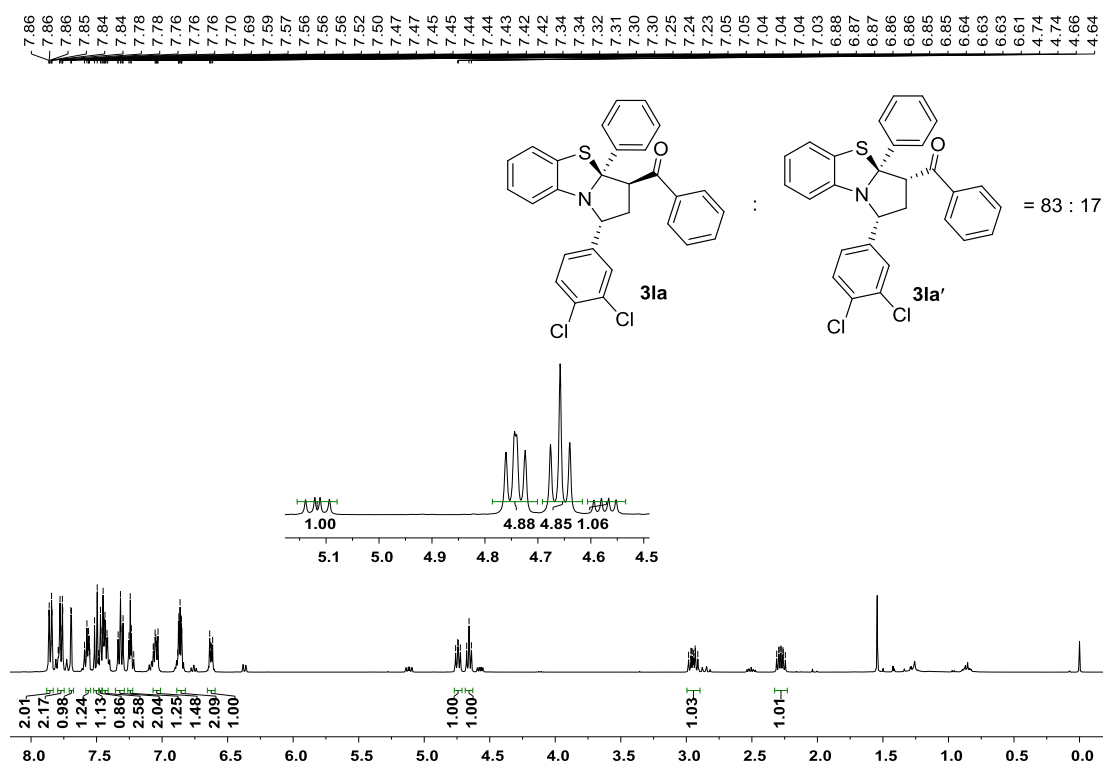

<sup>13</sup>C{<sup>1</sup>H} NMR (100 MHz, CDCl<sub>3</sub>)

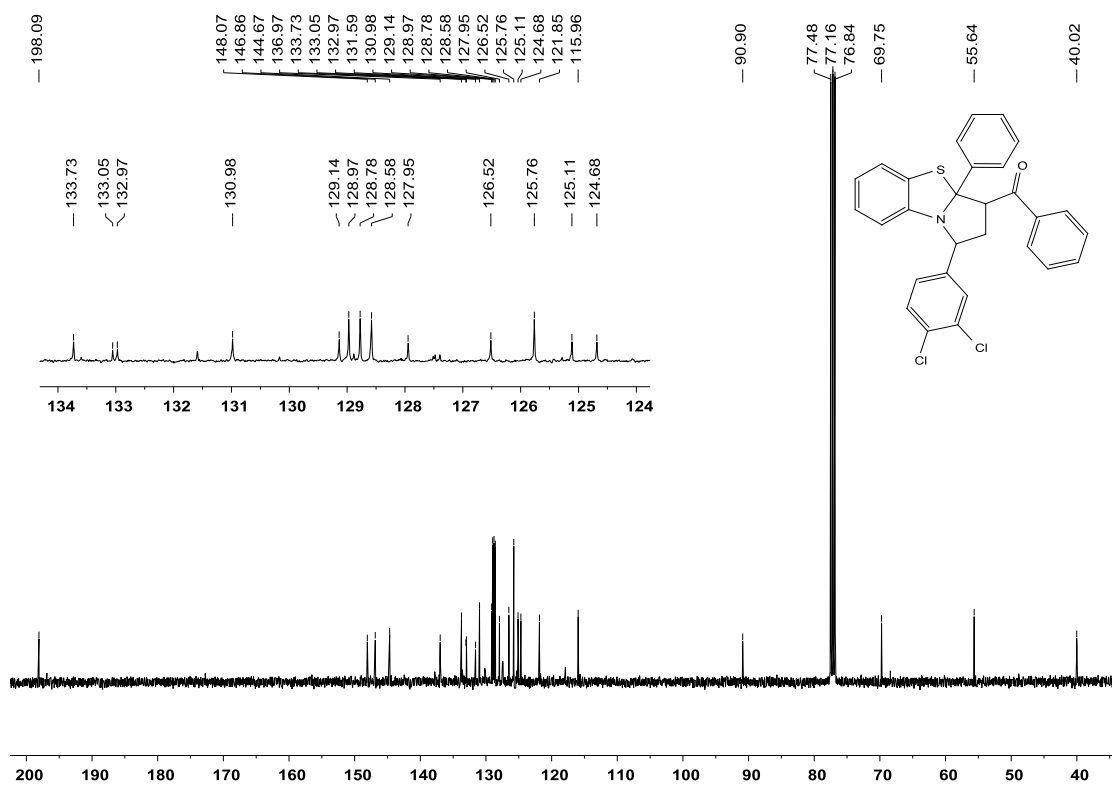

Compound **3ma**:

<sup>1</sup>H NMR (400 MHz, CDCl<sub>3</sub>)

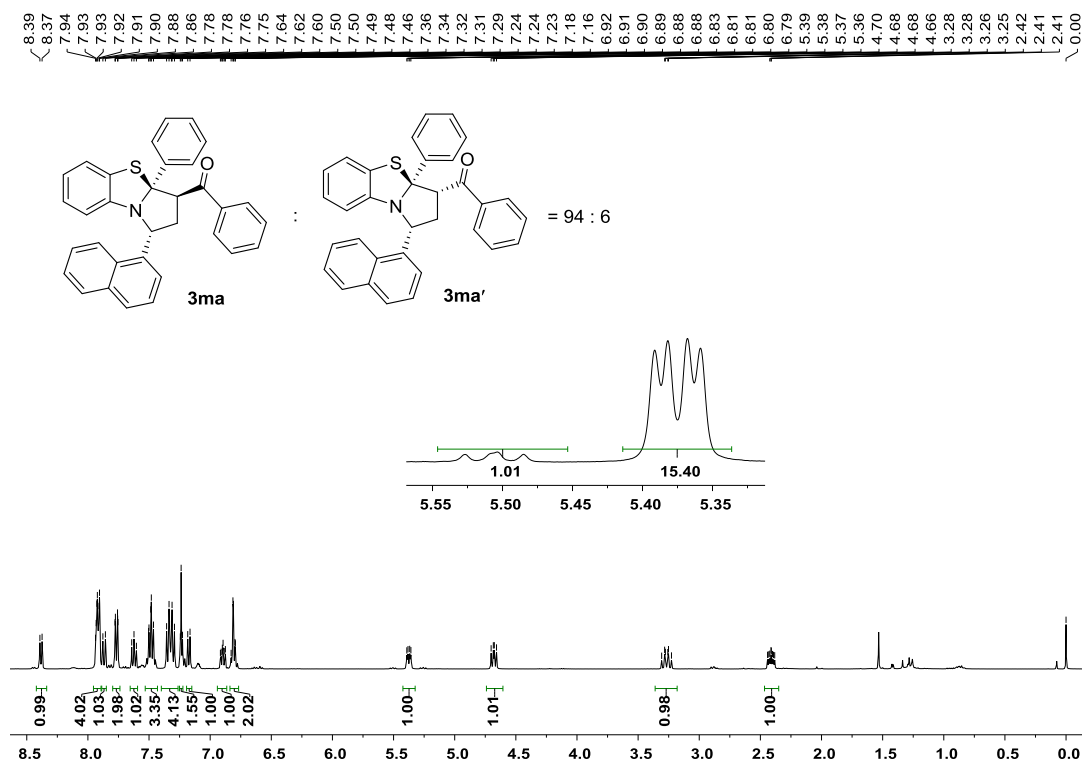

<sup>13</sup>C{<sup>1</sup>H} NMR (100 MHz, CDCl<sub>3</sub>)

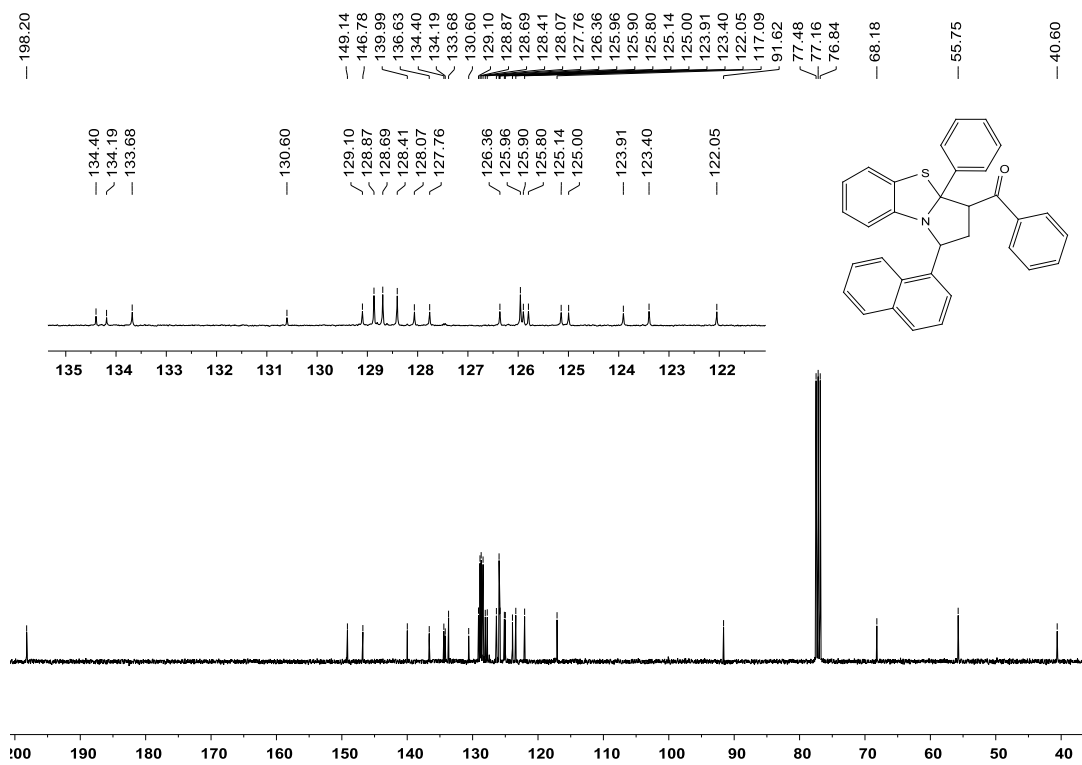

Compound **3na**:

<sup>1</sup>H NMR (400 MHz, CDCl<sub>3</sub>)

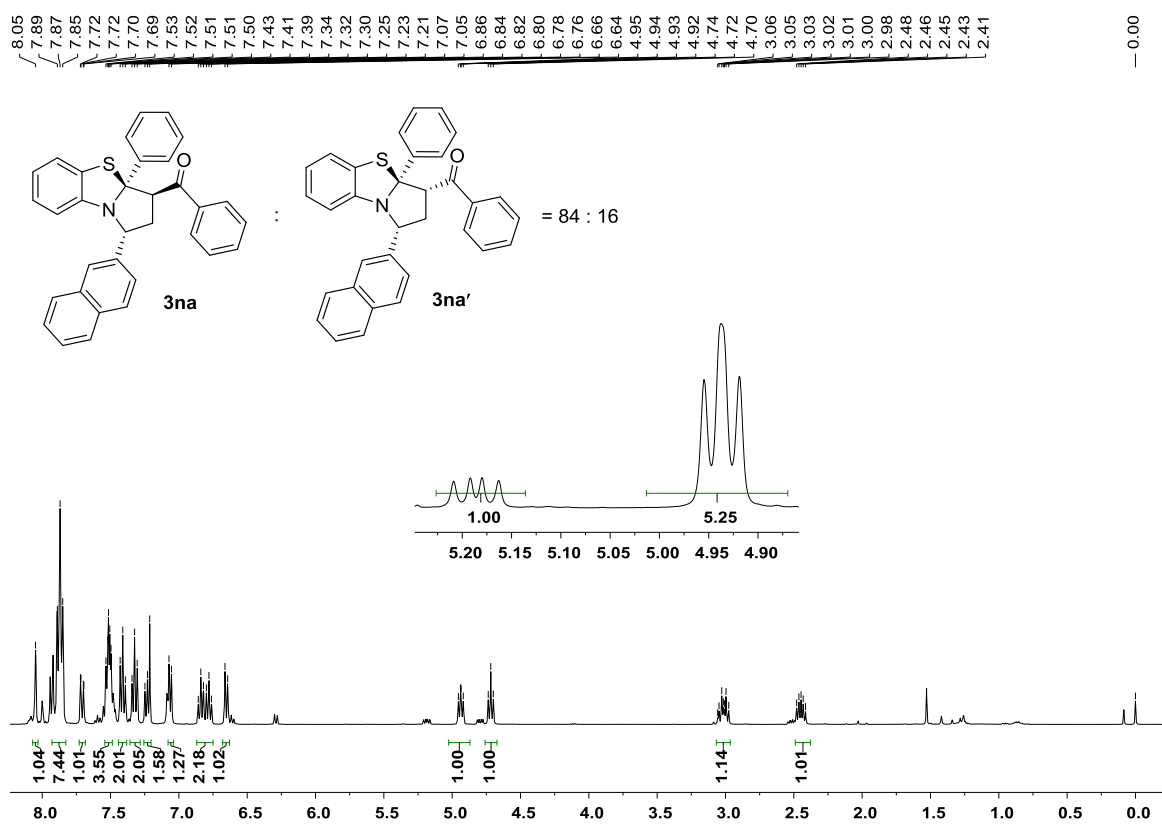

<sup>13</sup>C{<sup>1</sup>H} NMR (100 MHz, CDCl<sub>3</sub>)

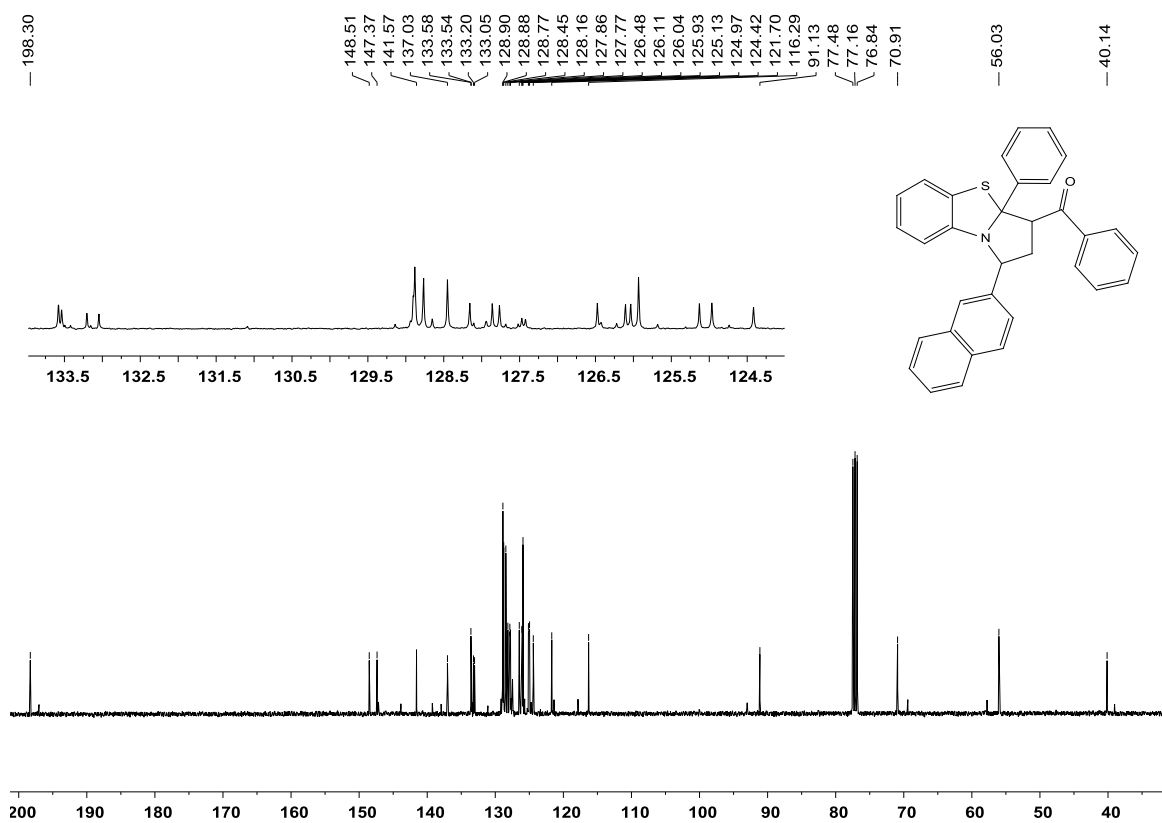

Compound **30a**:

$^1\text{H}$  NMR (400 MHz,  $\text{CDCl}_3$ )

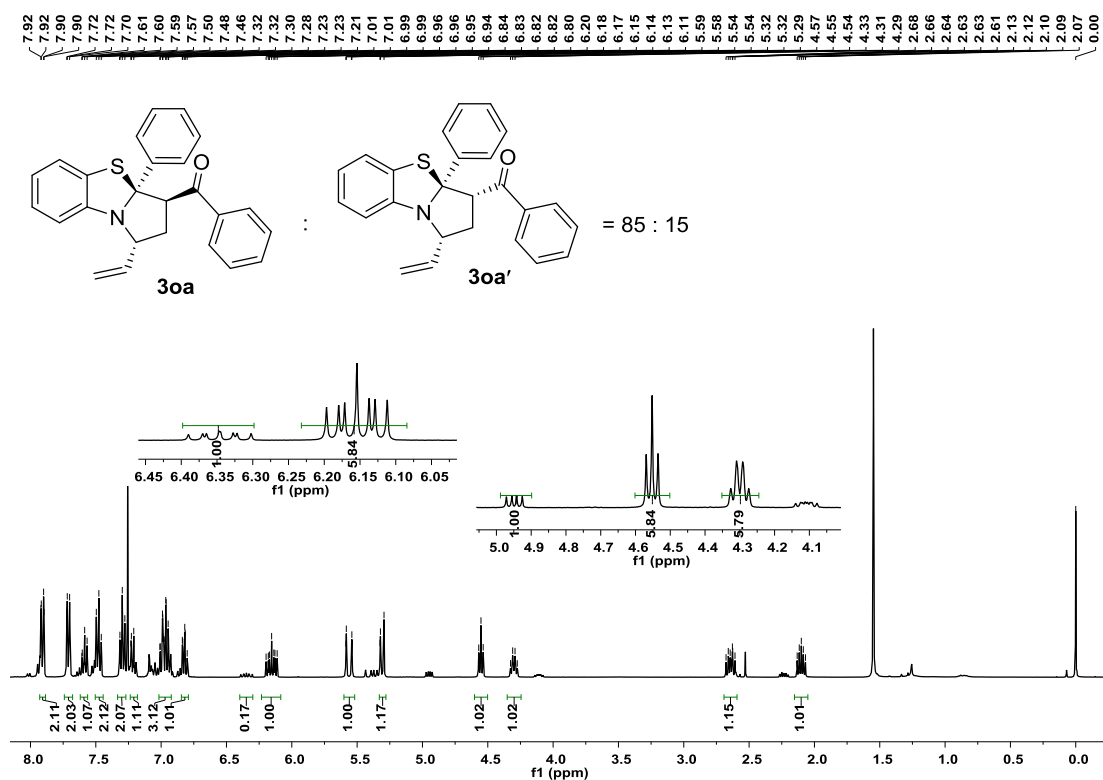

$^{13}\text{C}\{^1\text{H}\}$  NMR (100 MHz,  $\text{CDCl}_3$ )

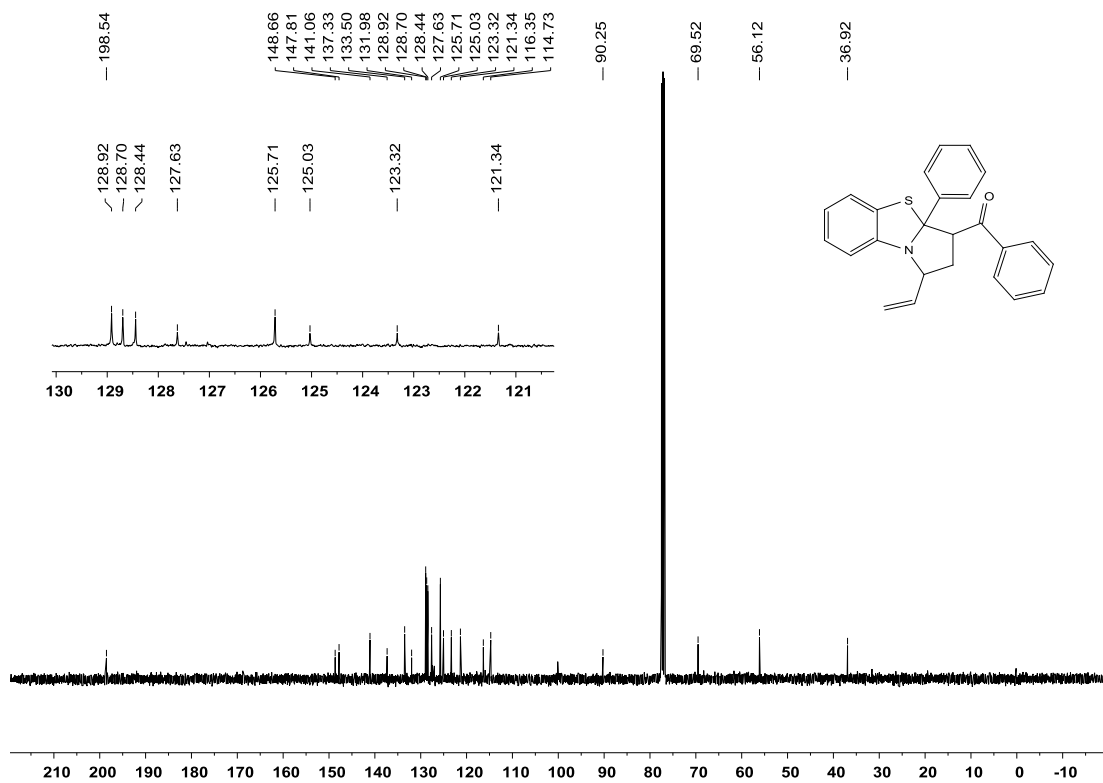

Compound **3pa**:

$^1\text{H}$  NMR (400 MHz,  $\text{CDCl}_3$ )

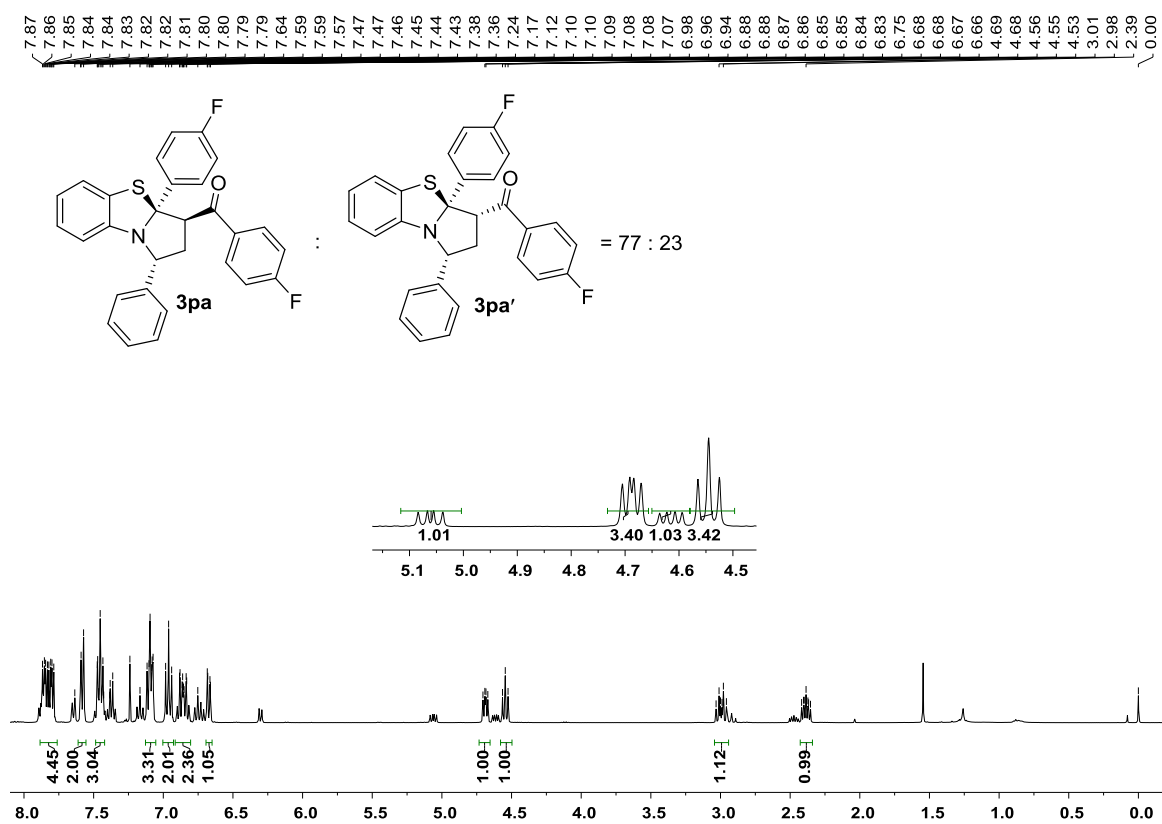

$^{13}\text{C}\{^1\text{H}\}$  NMR (100 MHz,  $\text{CDCl}_3$ )

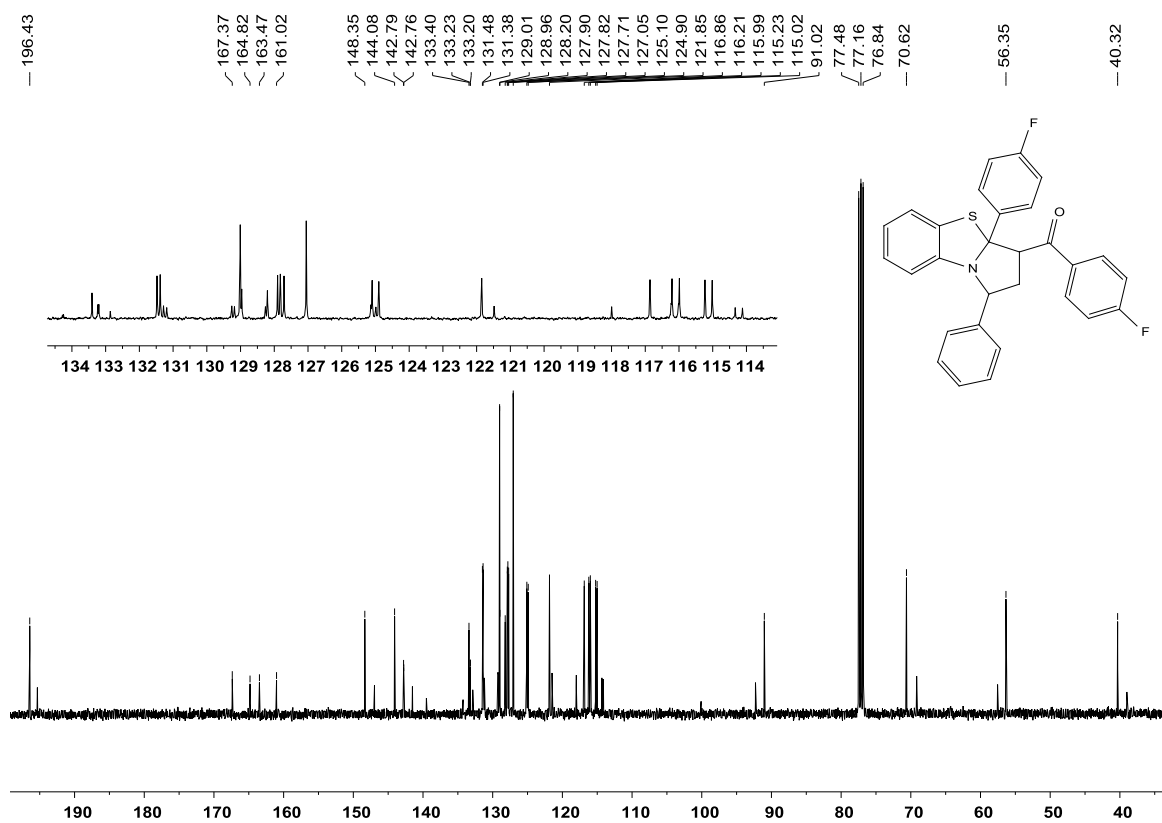

$^{19}\text{F}\{^1\text{H}\}$  NMR (376 MHz,  $\text{CDCl}_3$ )

-103.88  
-104.09

-114.54  
-114.92

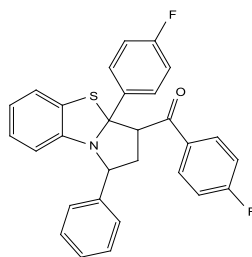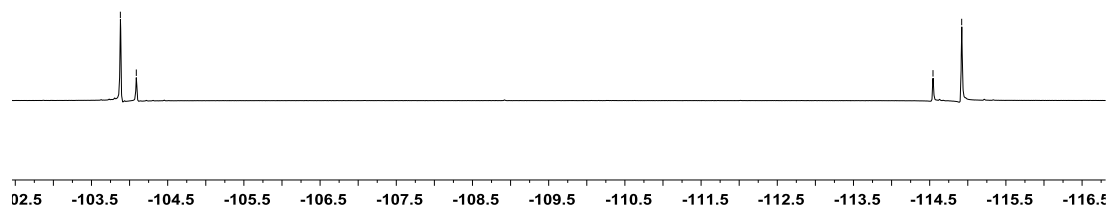

Compound **3qa**:

<sup>1</sup>H NMR (400 MHz, CDCl<sub>3</sub>)

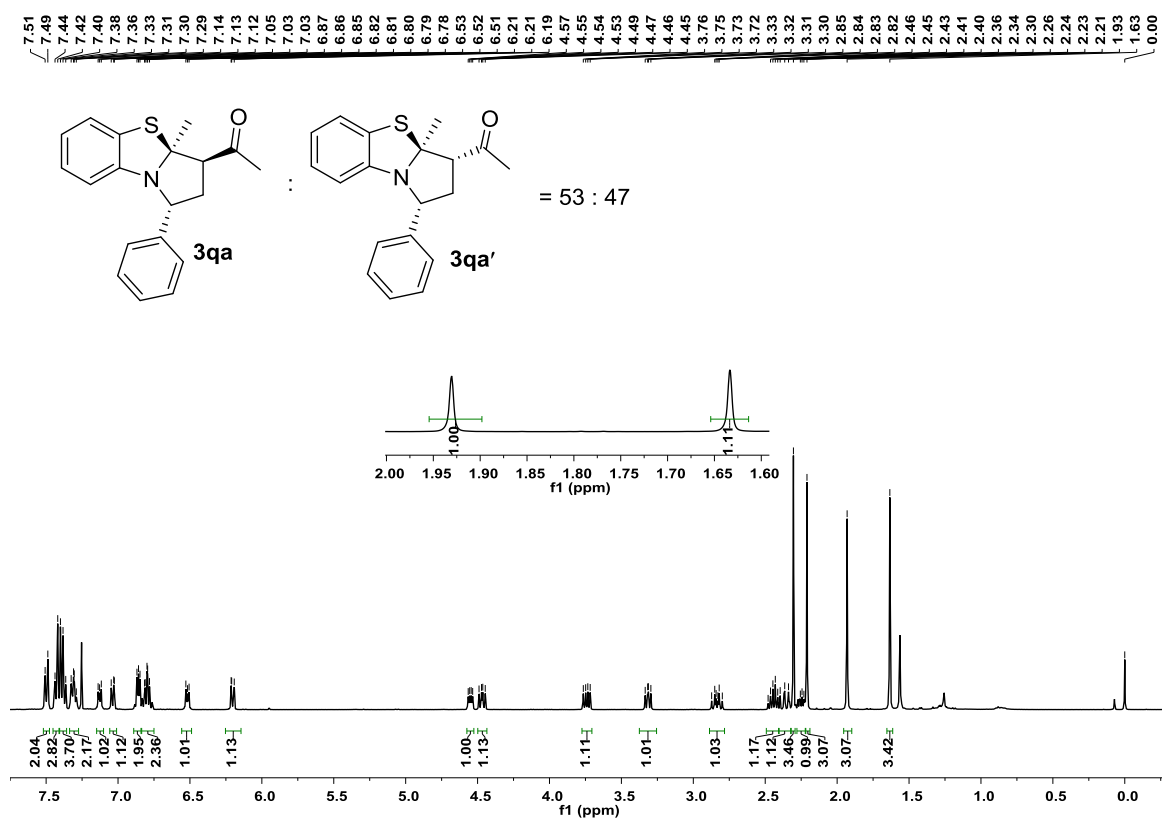

<sup>13</sup>C{<sup>1</sup>H} NMR (100 MHz, CDCl<sub>3</sub>)

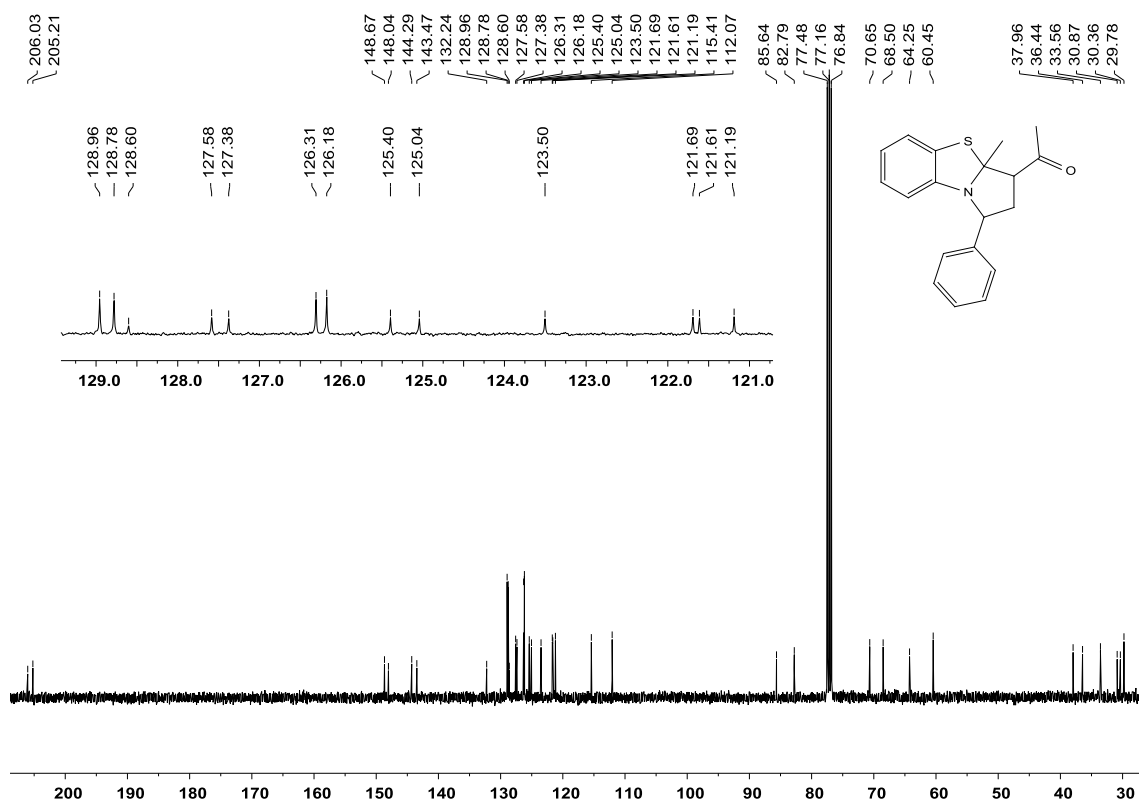



Compound 3ra:

<sup>1</sup>H NMR (400 MHz, CDCl<sub>3</sub>)

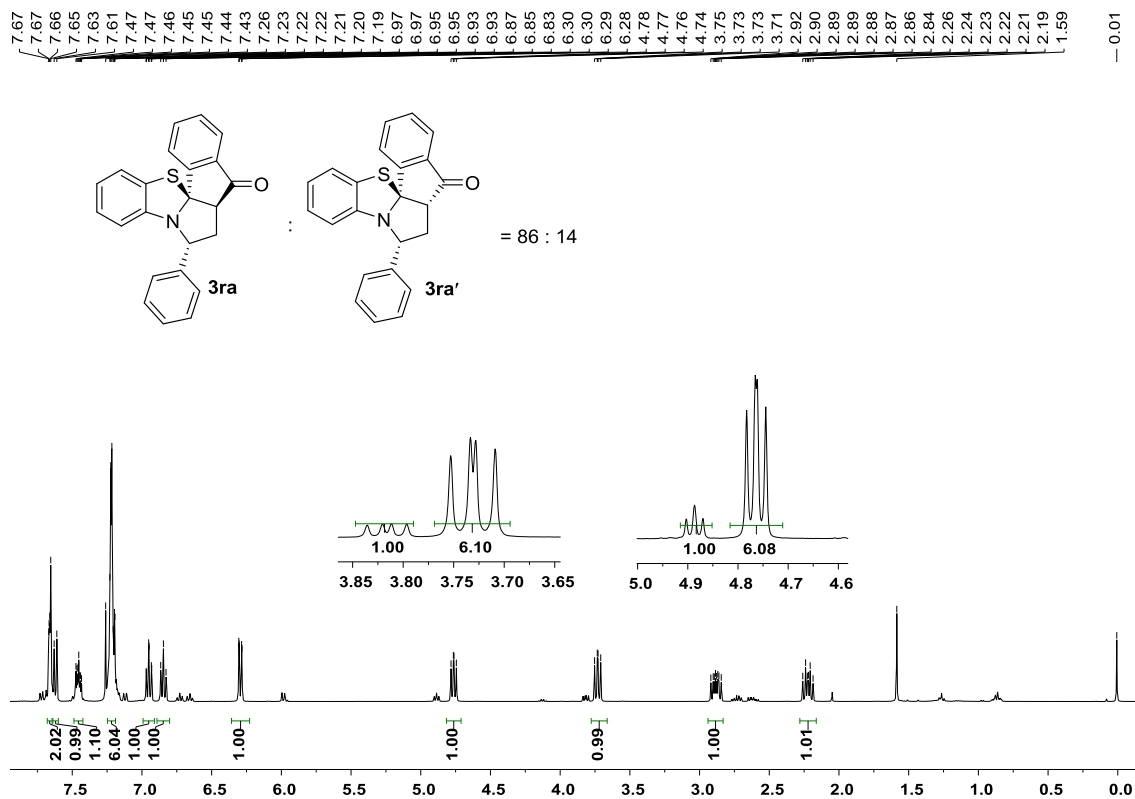

<sup>13</sup>C{<sup>1</sup>H} NMR (100 MHz, CDCl<sub>3</sub>)

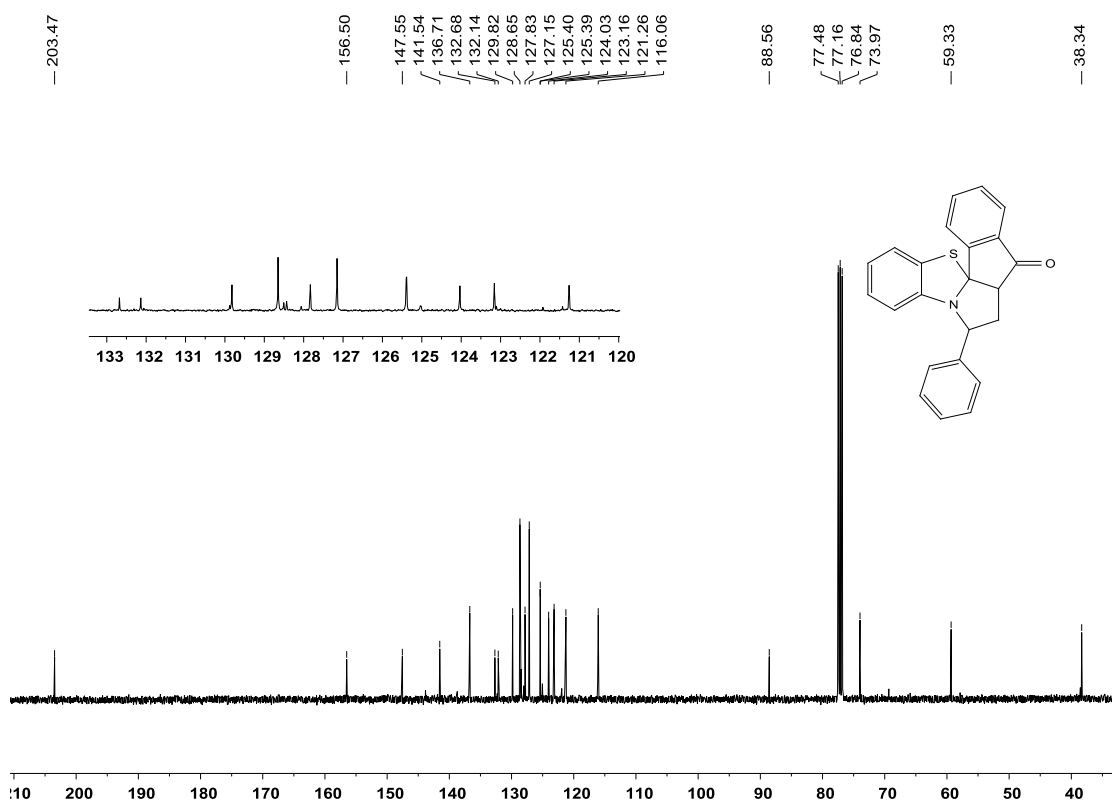

Compound **3sa**:

$^1\text{H}$  NMR (400 MHz,  $\text{CDCl}_3$ )

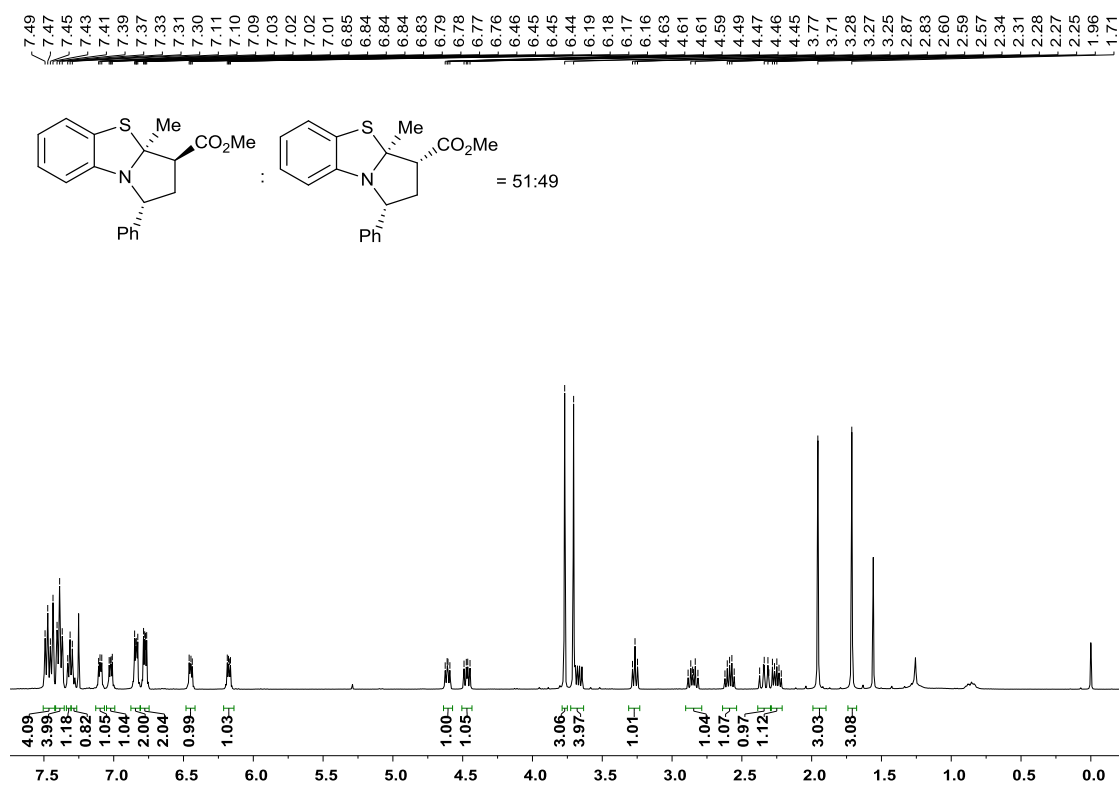

$^{13}\text{C}\{^1\text{H}\}$  NMR (100 MHz,  $\text{CDCl}_3$ )

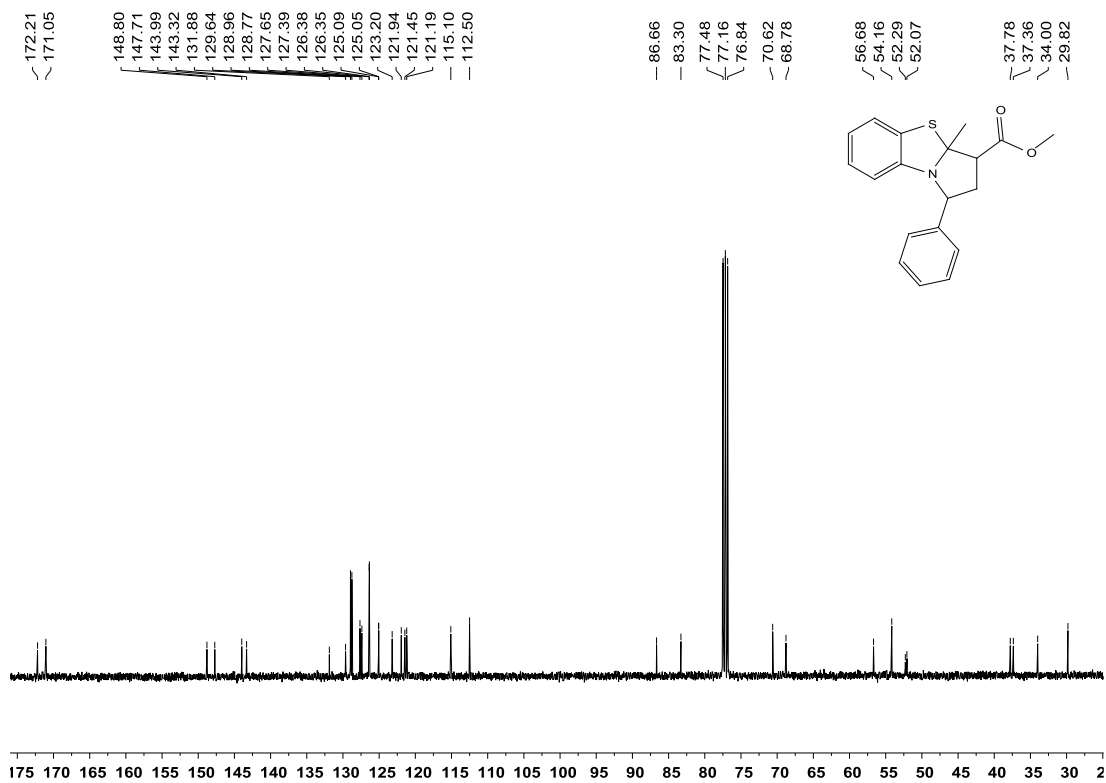

Compound **3ta**:

$^1\text{H}$  NMR (400 MHz,  $\text{CDCl}_3$ )

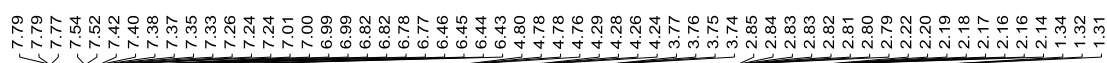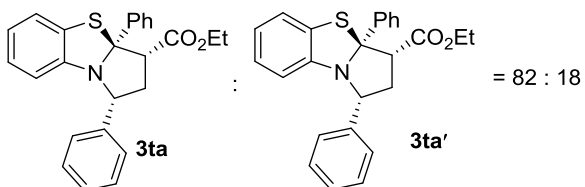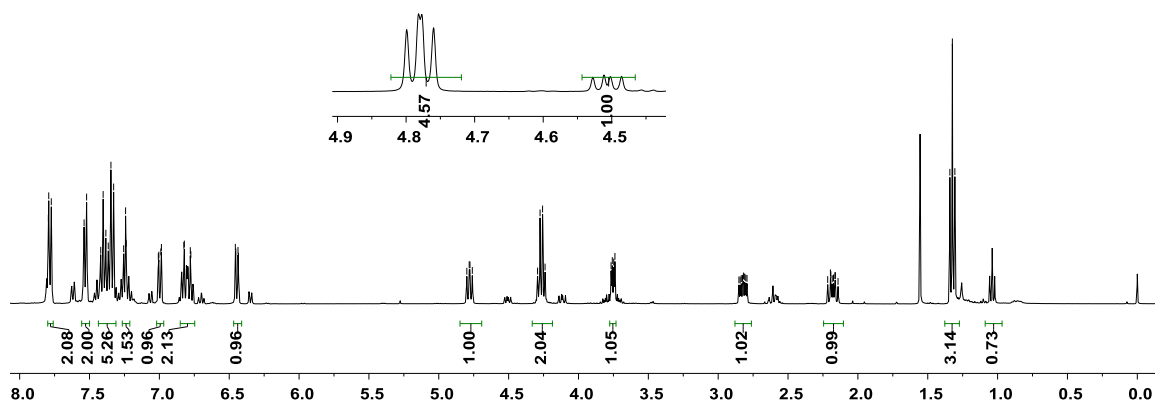

$^{13}\text{C}\{^1\text{H}\}$  NMR (100 MHz,  $\text{CDCl}_3$ )

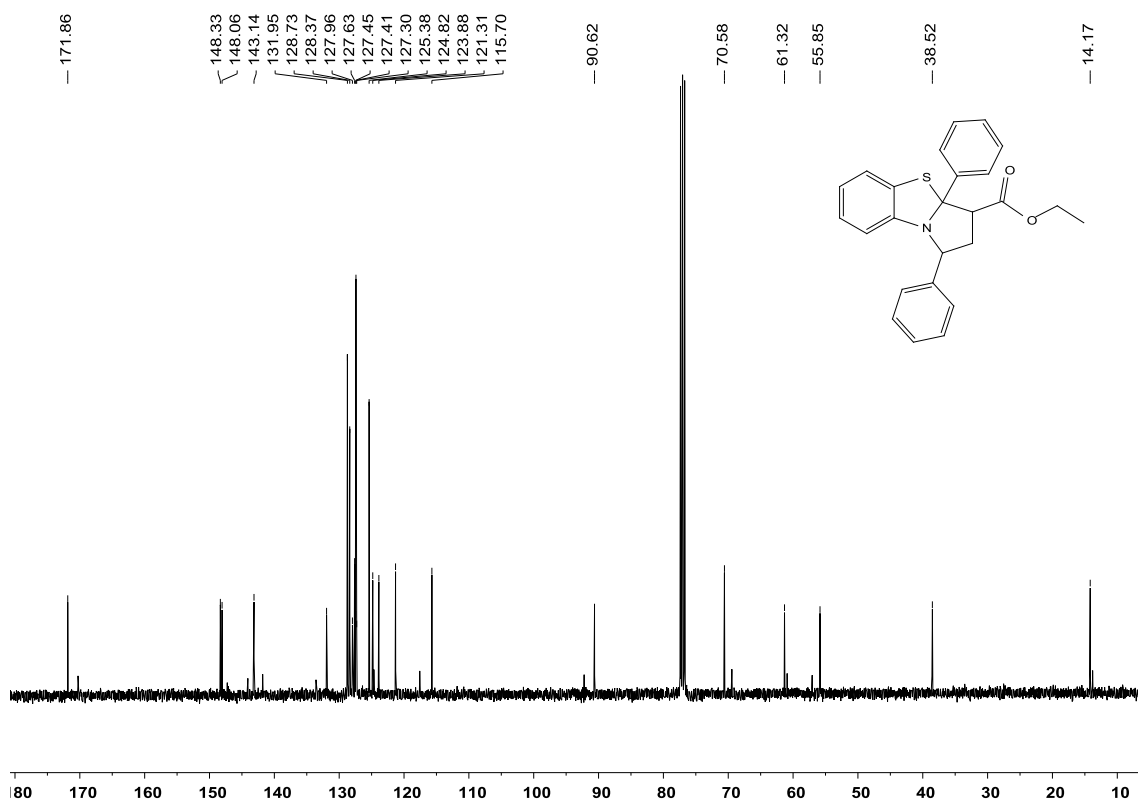

Compound **3ab**:

<sup>1</sup>H NMR (400 MHz, CDCl<sub>3</sub>)

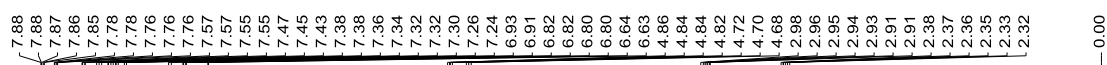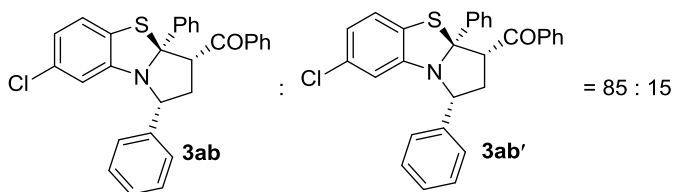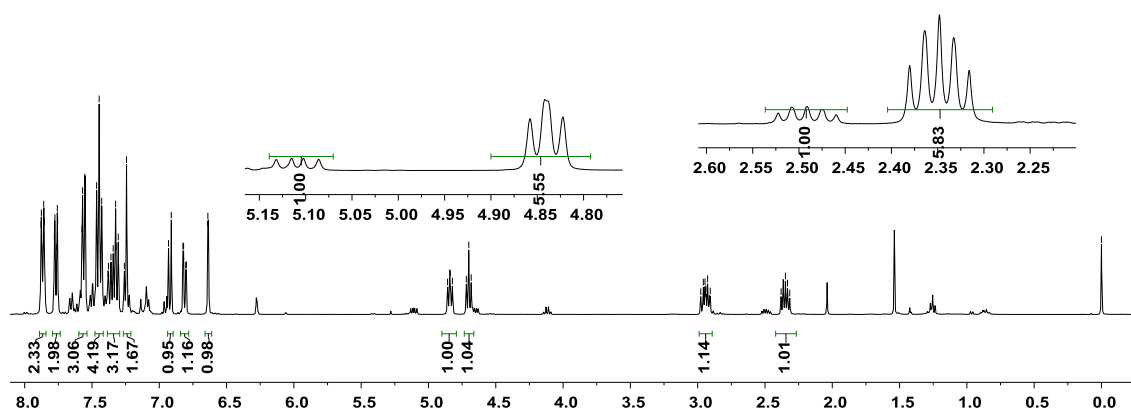

<sup>13</sup>C{<sup>1</sup>H} NMR (100 MHz, CDCl<sub>3</sub>)

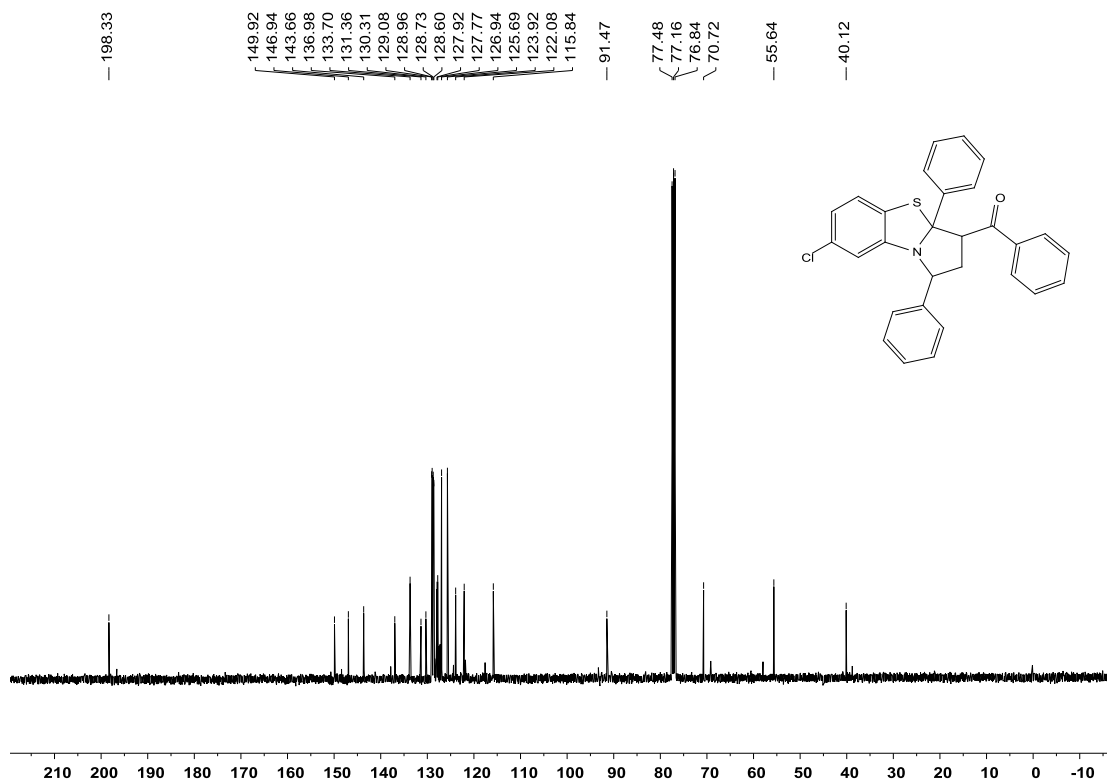

Compound **3ac**:

$^1\text{H}$  NMR (400 MHz,  $\text{CDCl}_3$ )

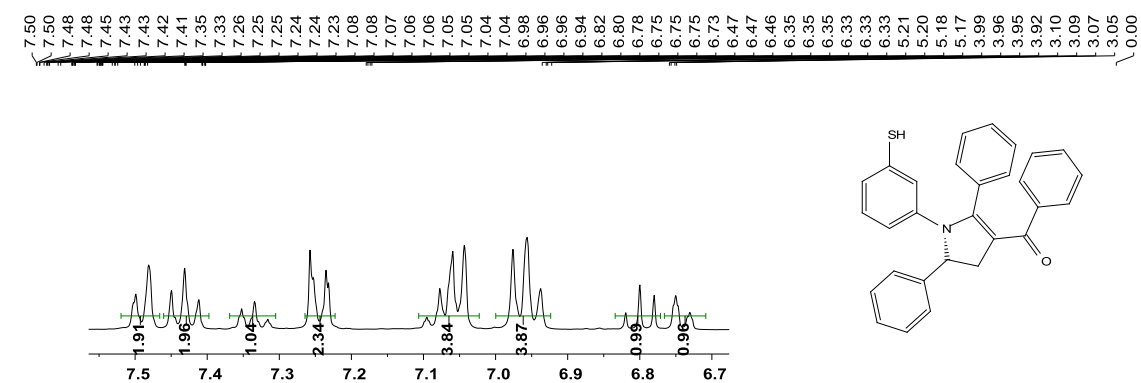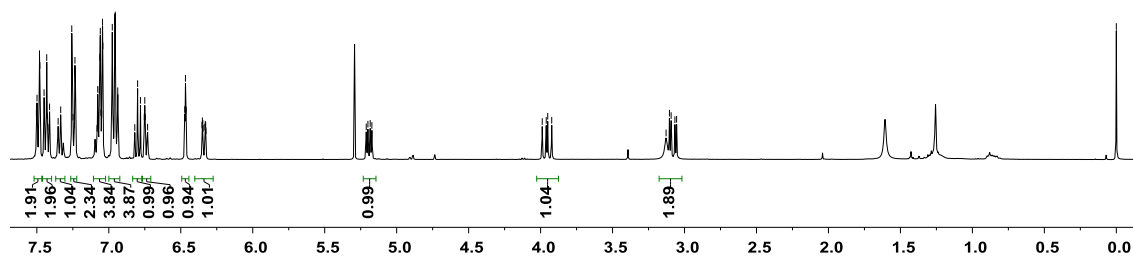

$^{13}\text{C}\{^1\text{H}\}$  NMR (100 MHz,  $\text{CDCl}_3$ )

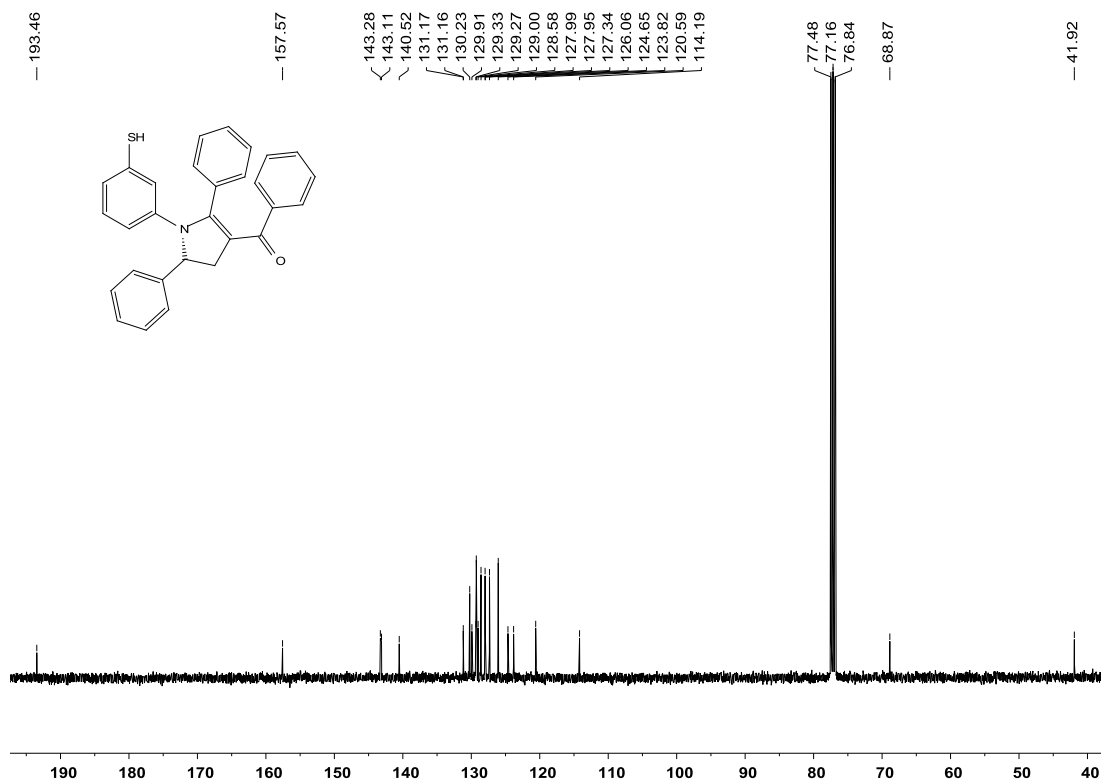

Compound **3ad**:

$^1\text{H}$  NMR (400 MHz,  $d_6$ -DMSO)

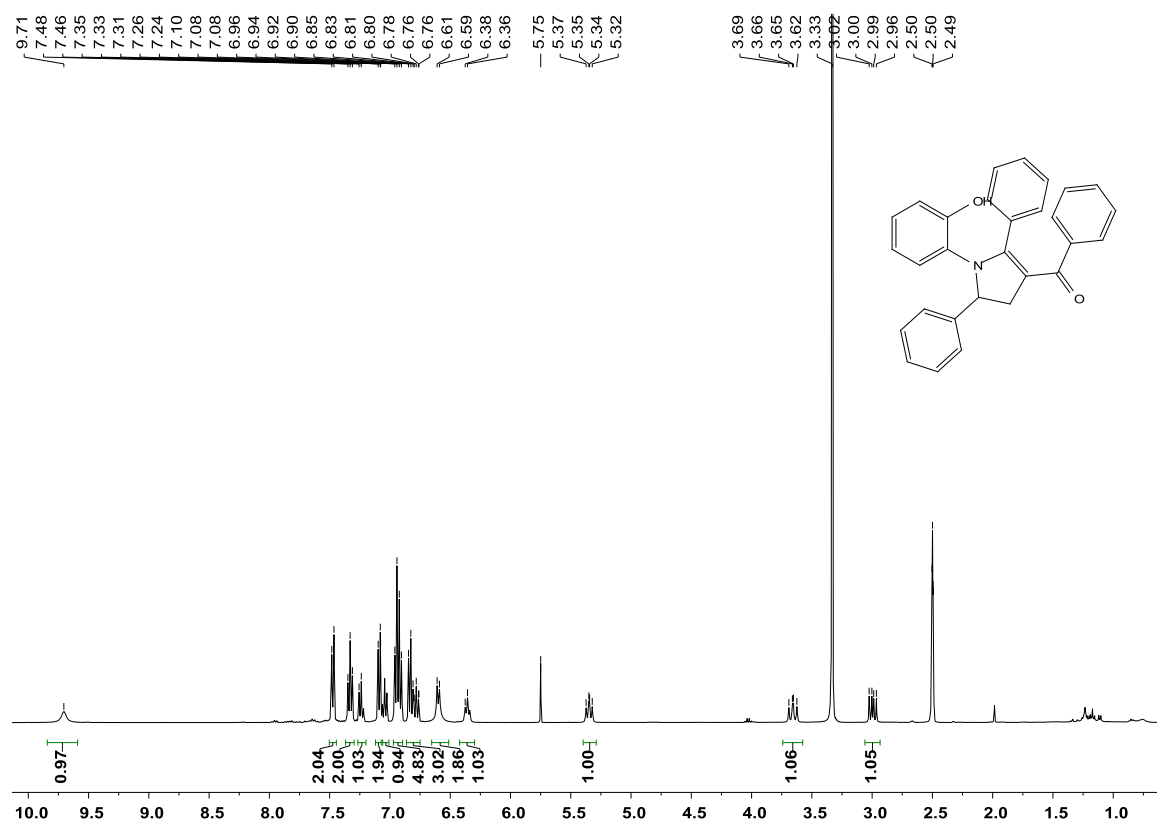

$^{13}\text{C}\{^1\text{H}\}$  NMR (100 MHz,  $d_6$ -DMSO)

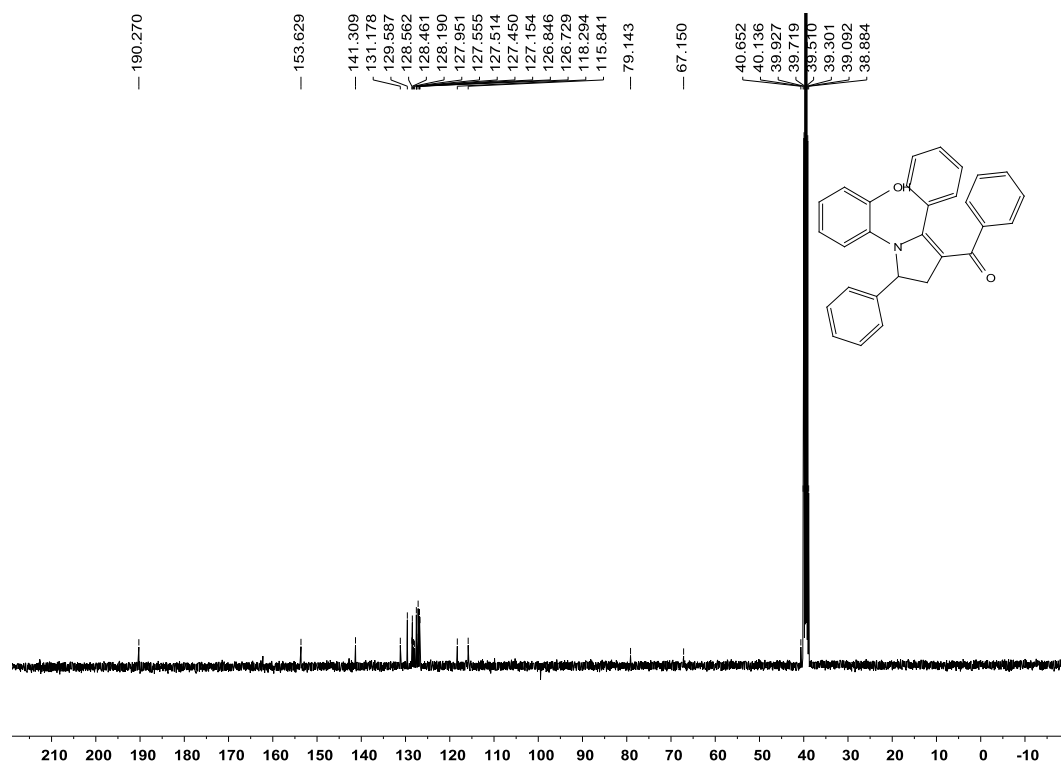

Compound 4:

<sup>1</sup>H NMR (400 MHz, CDCl<sub>3</sub>)

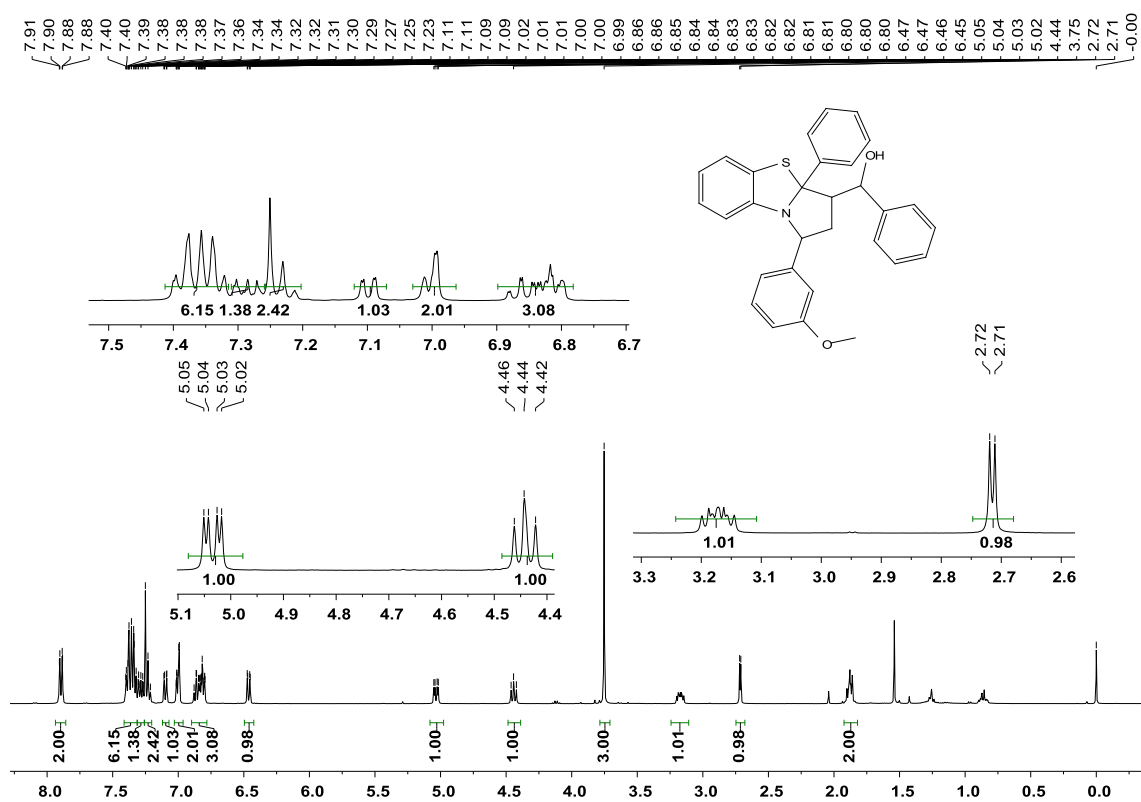

<sup>13</sup>C{<sup>1</sup>H} NMR (100 MHz, CDCl<sub>3</sub>)

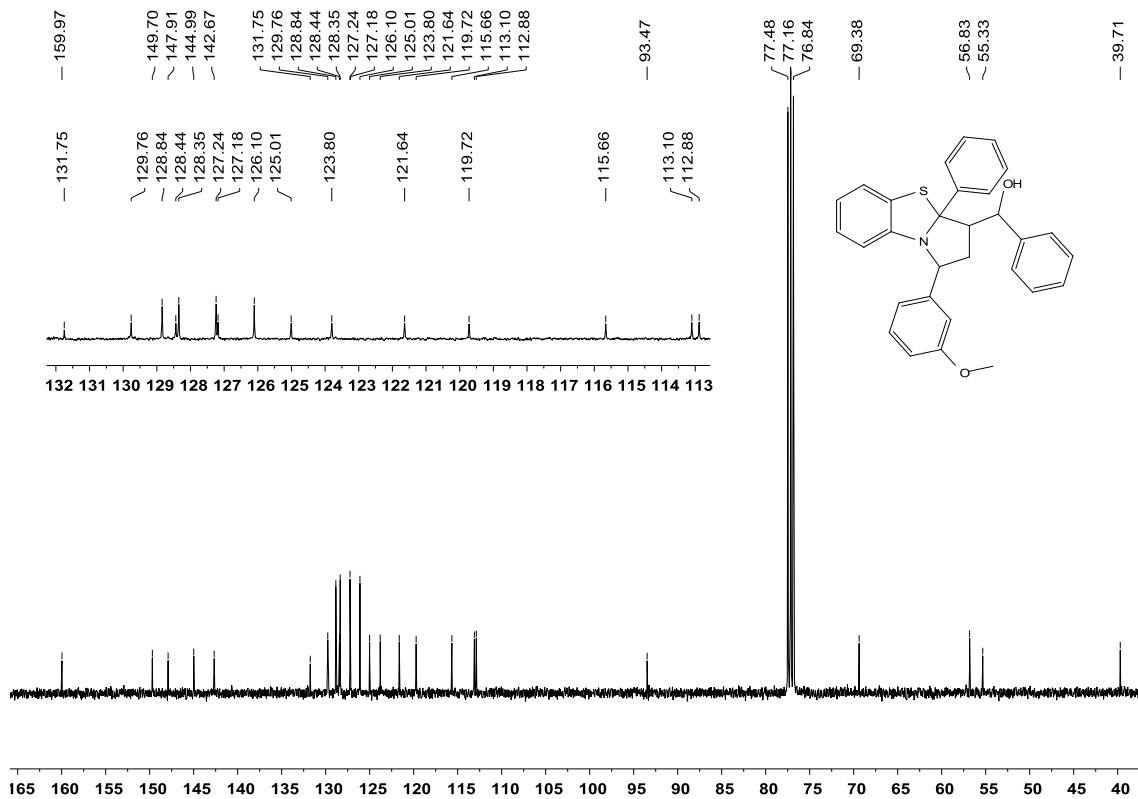

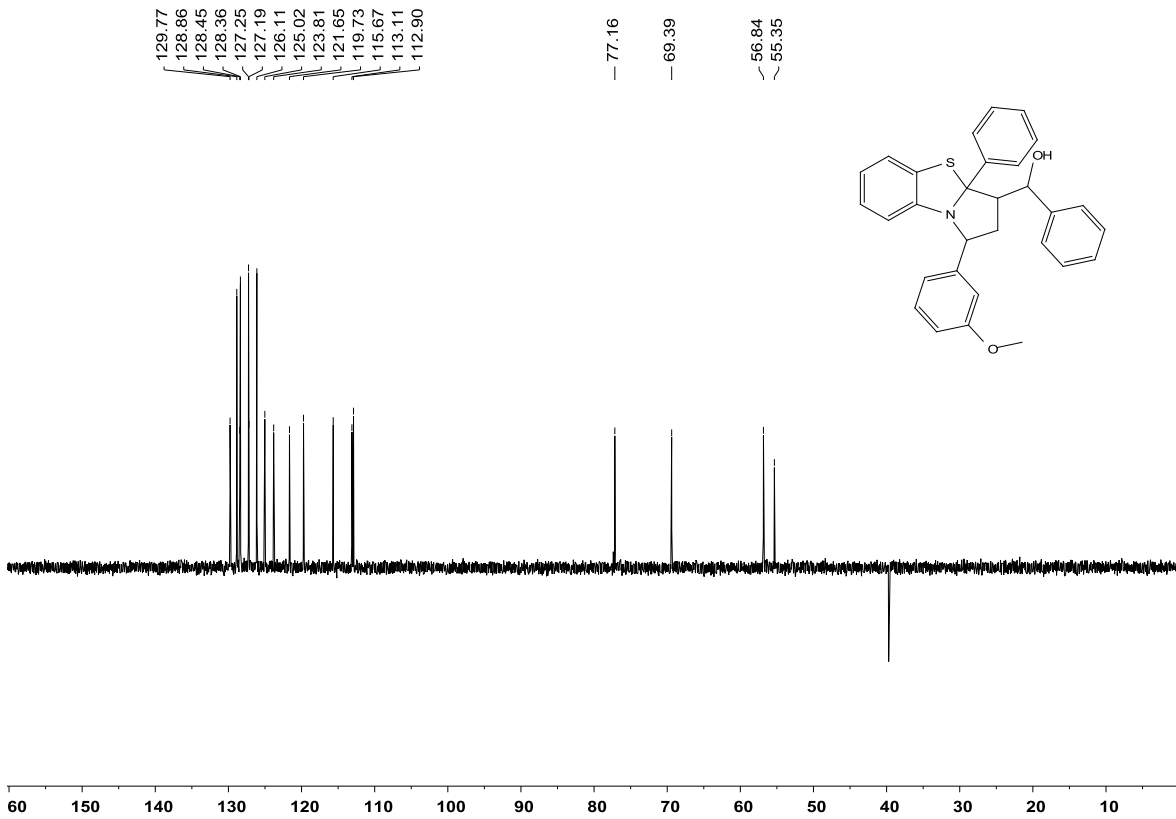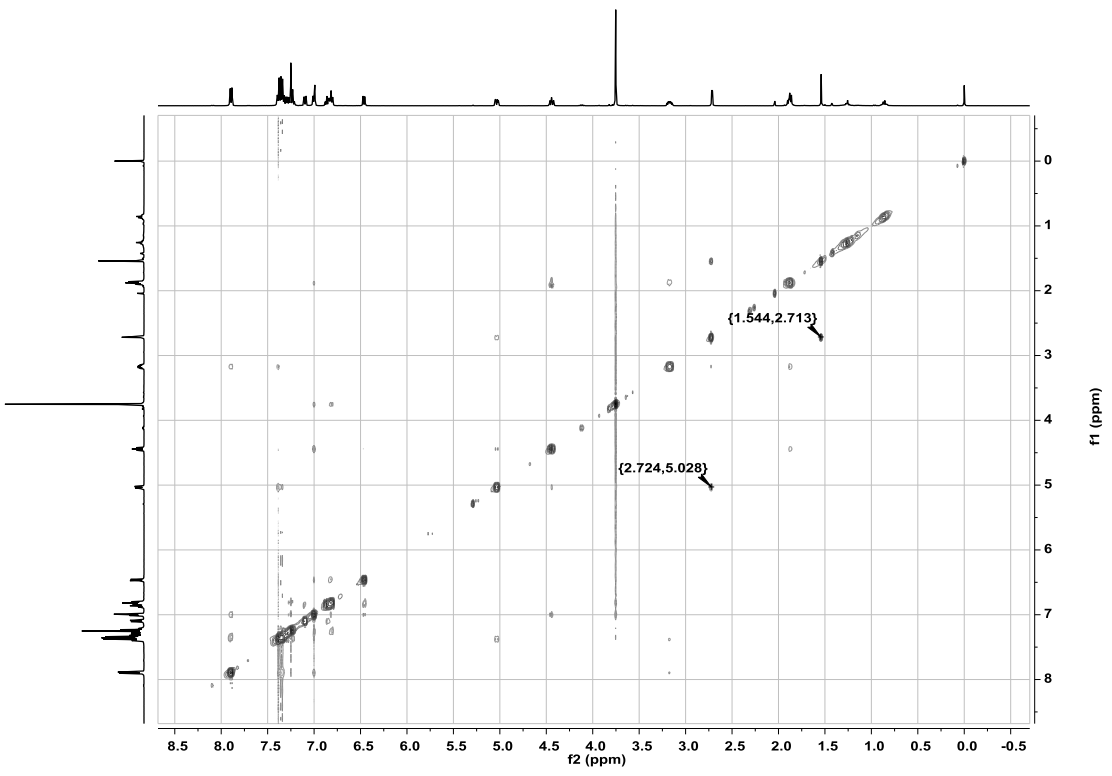



Compound 5:

$^1\text{H}$  NMR (400 MHz,  $\text{CDCl}_3$ )

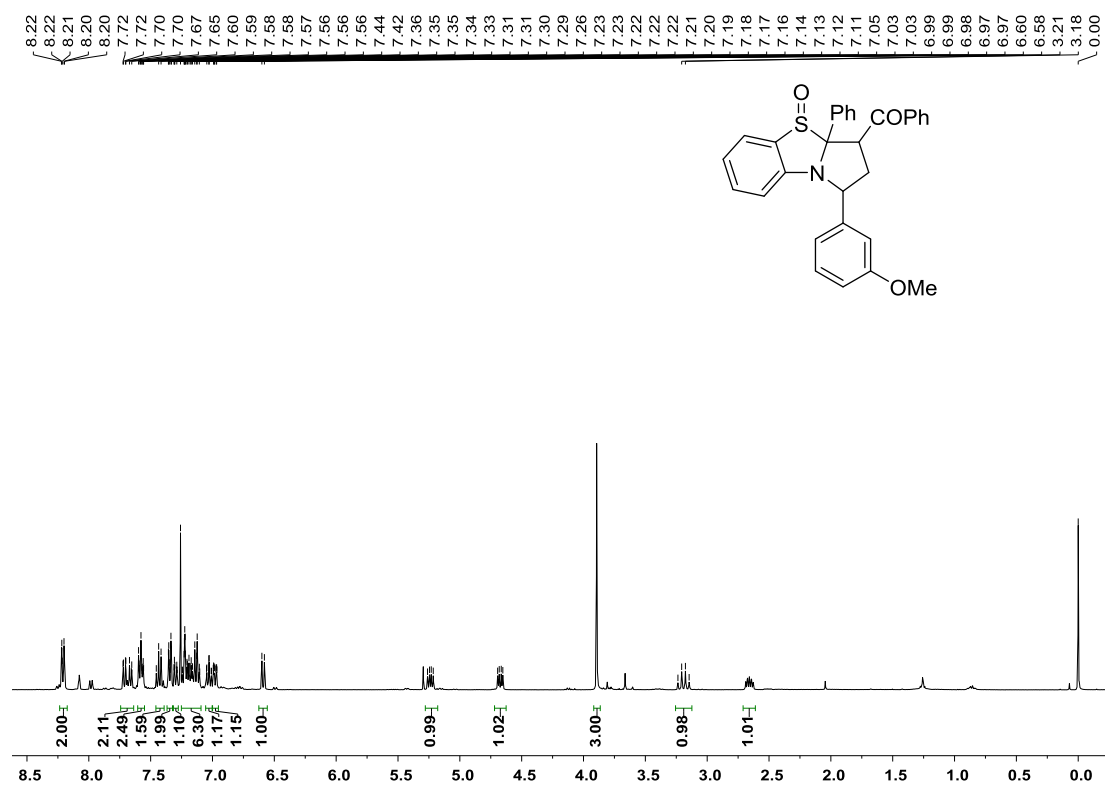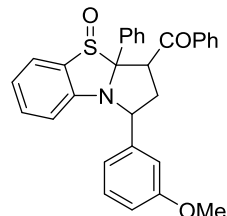

$^{13}\text{C}\{^1\text{H}\}$  NMR (100 MHz,  $\text{CDCl}_3$ )

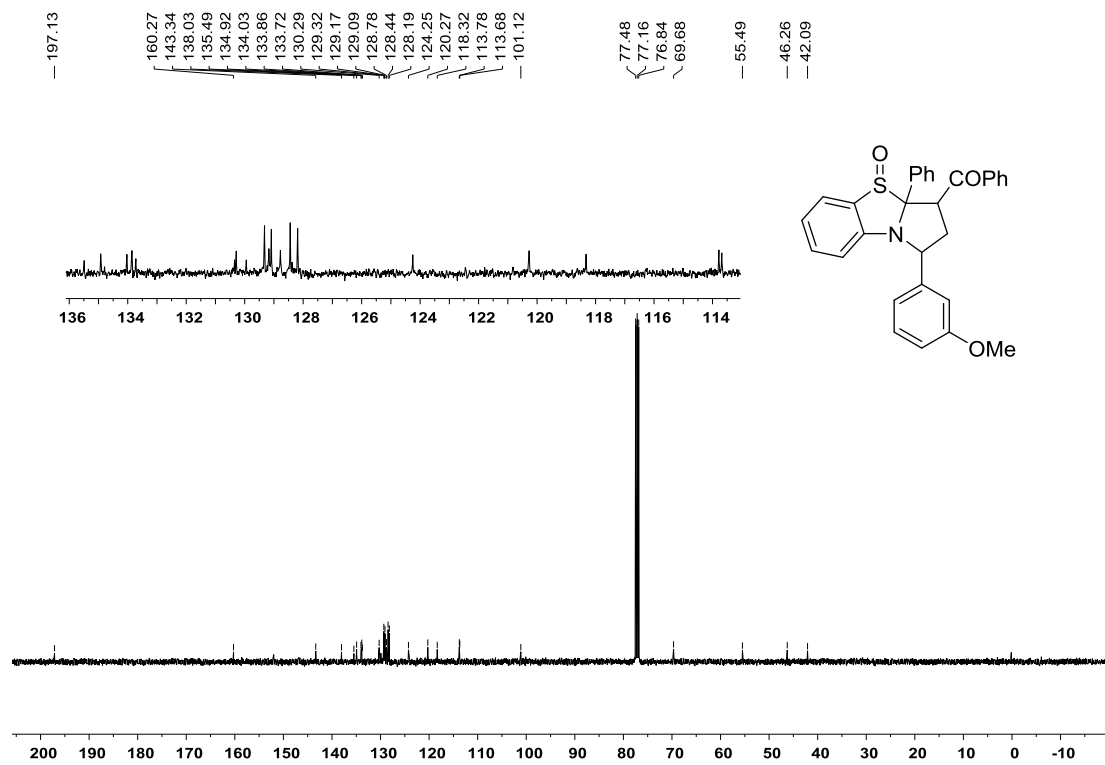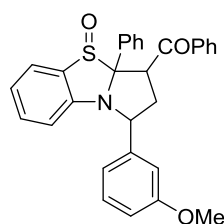

### (M) Copies of CD Spectra for Recovered D-A Cyclopropanes

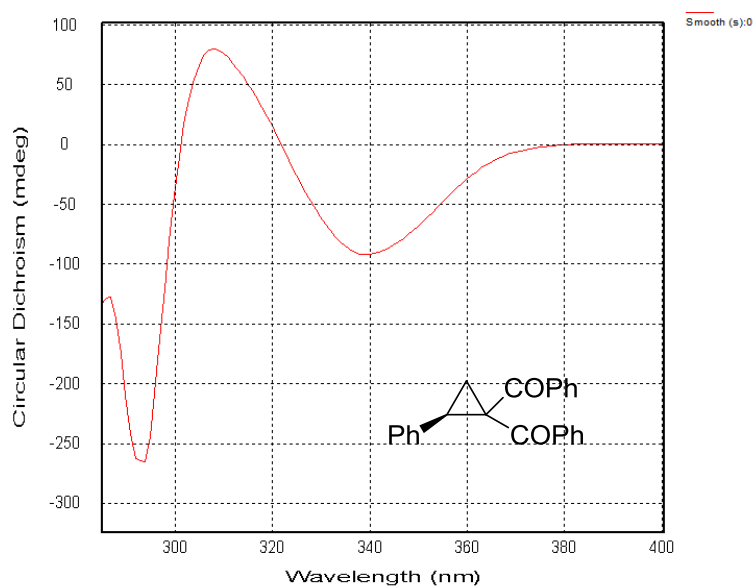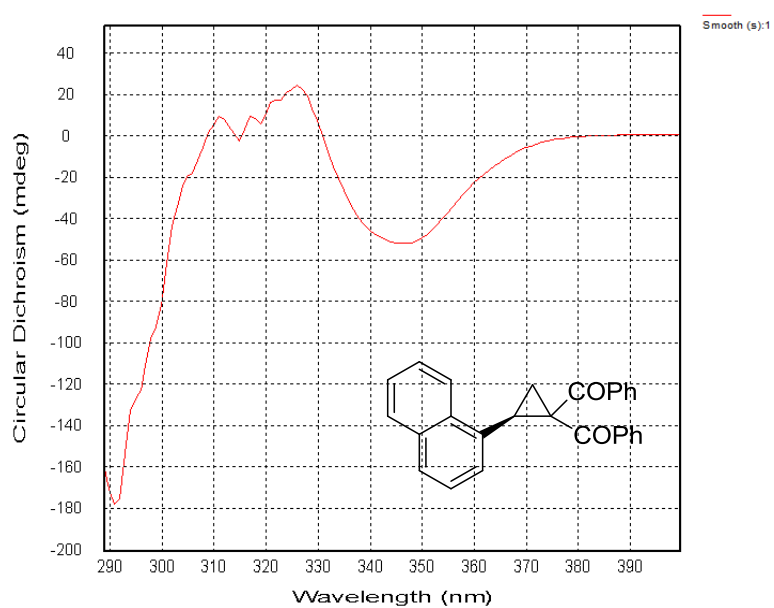

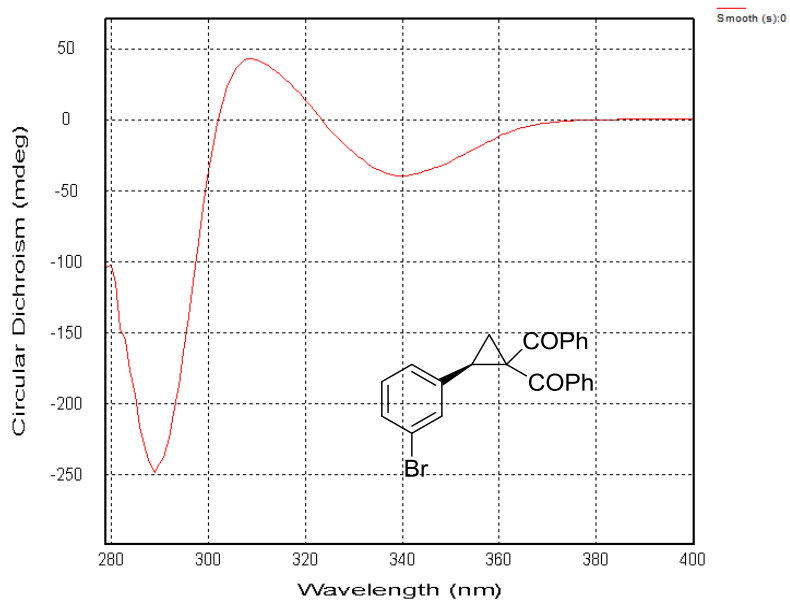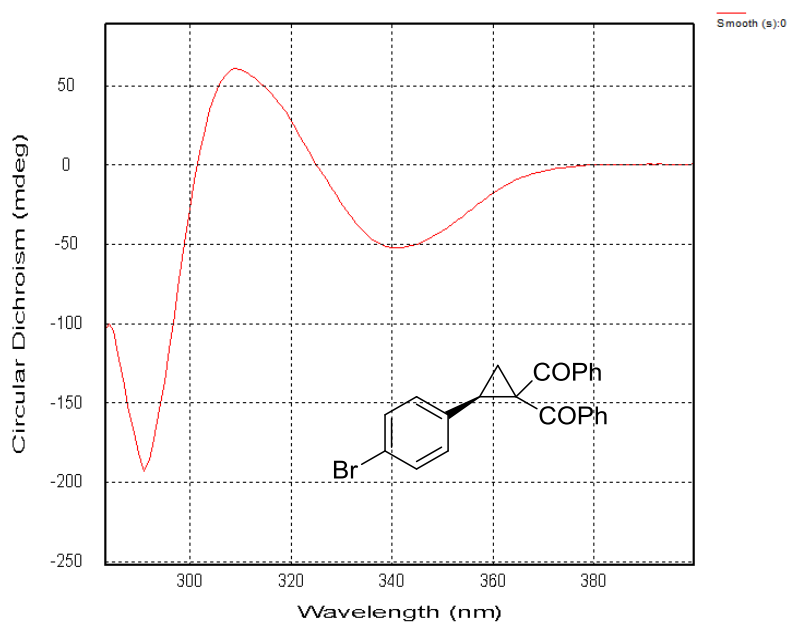

Supplement: d0cc05667g1.pdf [file d0cc05667g1.pdf]
